# Supplementary material for: Characterization of Venom Components and Their Phylogenetic Properties in Some Aculeate Bumblebees and Wasps
Source: PubMed Central journal article supplement (PMC7020409; doi:10.3390/toxins12010047), 2020-01-14
Supplement: toxins-12-00047-s001.pdf [file toxins-12-00047-s001.pdf]

# Supplementary Materials: Characterization of Venom Components and Their Phylogenetic Properties in Some Aculeate Bumblebees and Wasps

Kyungjae Andrew Yoon, Kyungmun Kim, Woo-Jin Kim, Woo Young Bang, Neung-Ho Ahn, Chang-Hwan Bae, Joo-Hong Yeo and Si Hyeock Lee

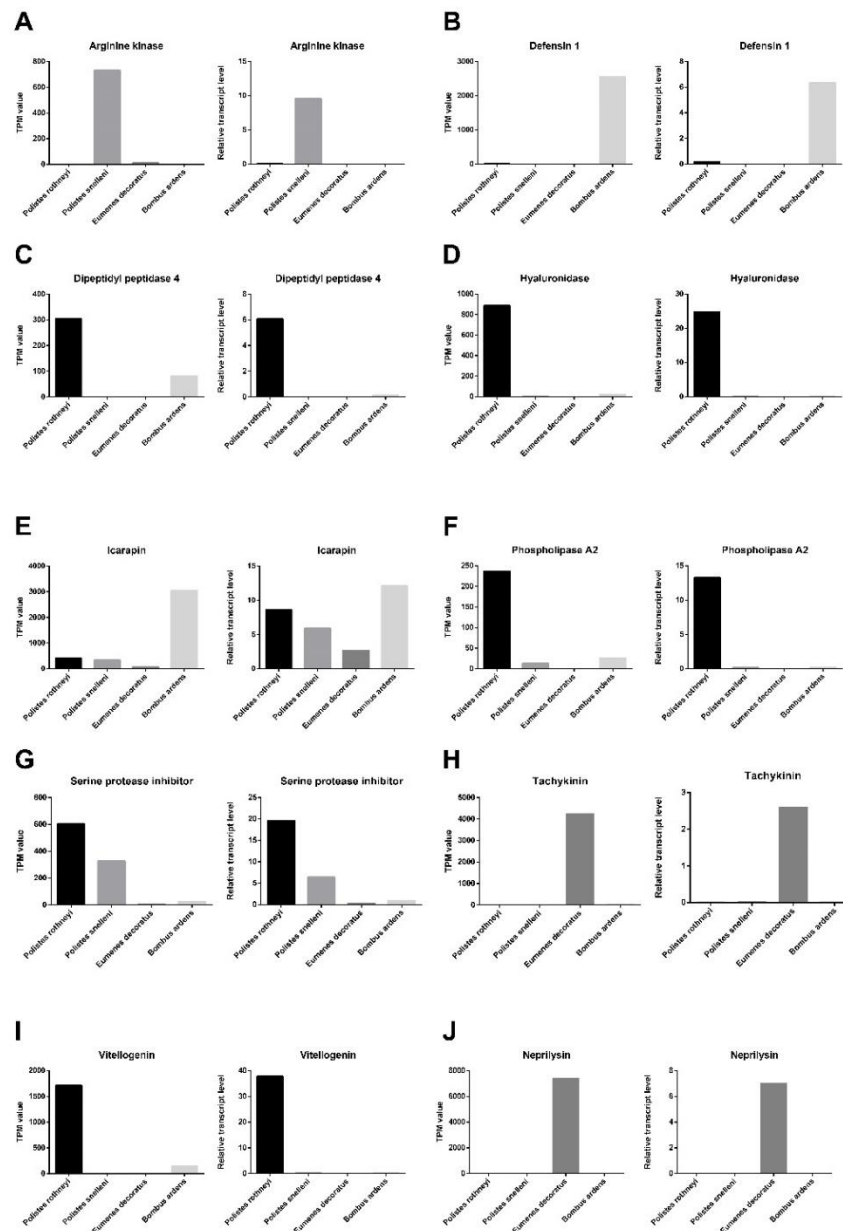

**Figure S1.** Comparison of the relative transcription levels and TPM values of A) arginine kinase, B) defensin 1, C) dipeptidyl peptidase 4, D) hyaluronidase, E) icarapin, F) phospholipase A2, G) serine protease inhibitor, H) tachykinin, I) vitellogenin and J) neprilysin from *P. rothneyi*, *P. snelleni*, *E. decoratus* and *B. ardens*.



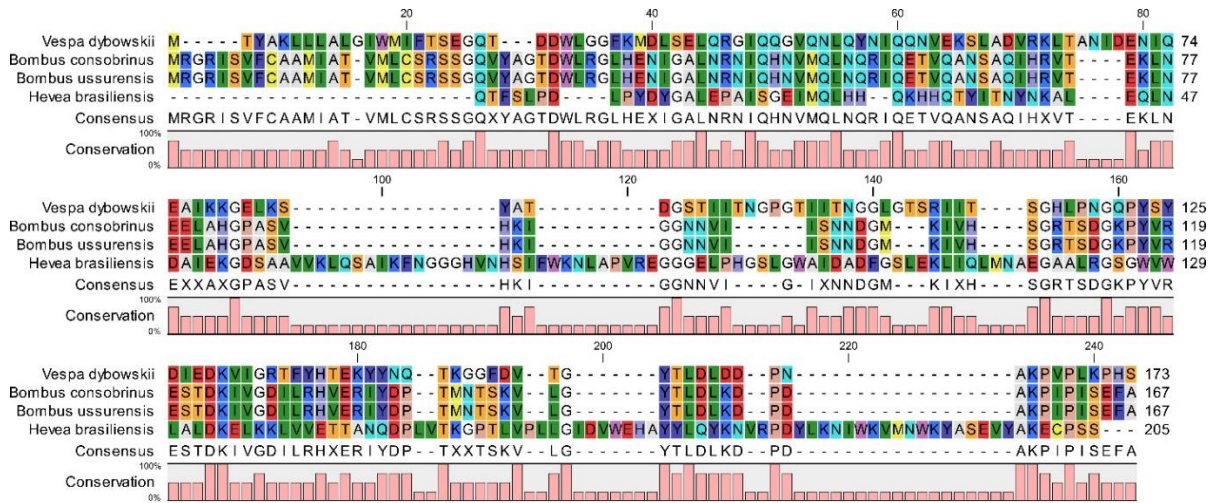

**Figure S4.** Amino acid alignments of uncharacterized protein 3 from *V. dybowskii*, *B. consobrinus*, *B. ussurrensis* and *Hevea brasiliensis*.

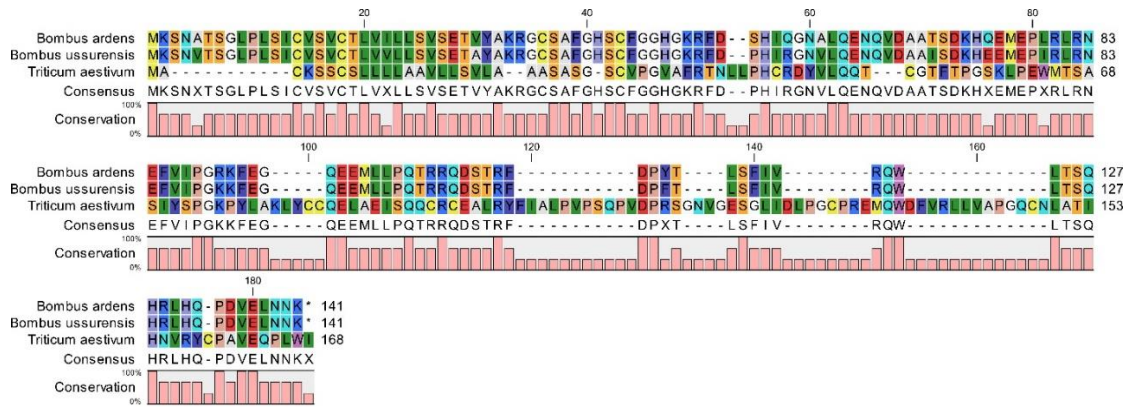

**Figure S5.** Amino acid alignments of uncharacterized protein 4 from *B. ardens*, *B. ussurrensis* and *Triticum aestivum*.

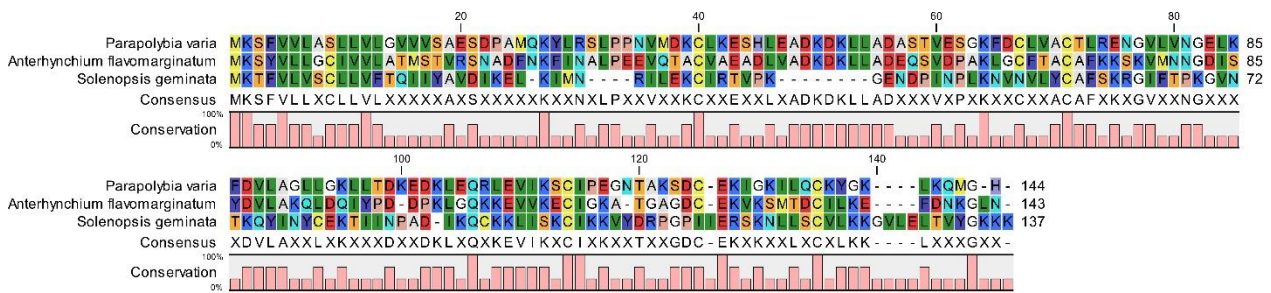

**Figure S6.** Amino acid alignments of uncharacterized protein 5 from *P. varia*, *A. flavomarginatum* and *S. geminata*.

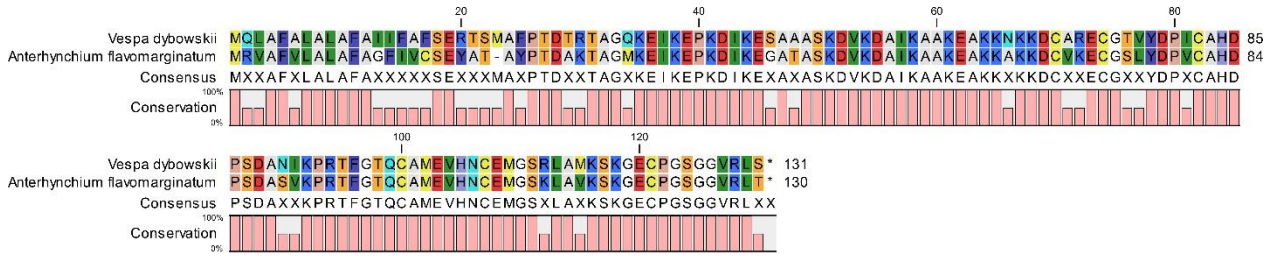

Figure S7. Amino acid alignments of uncharacterized protein 6 from *V. dybowskii* and *A. flavomarginatum*.

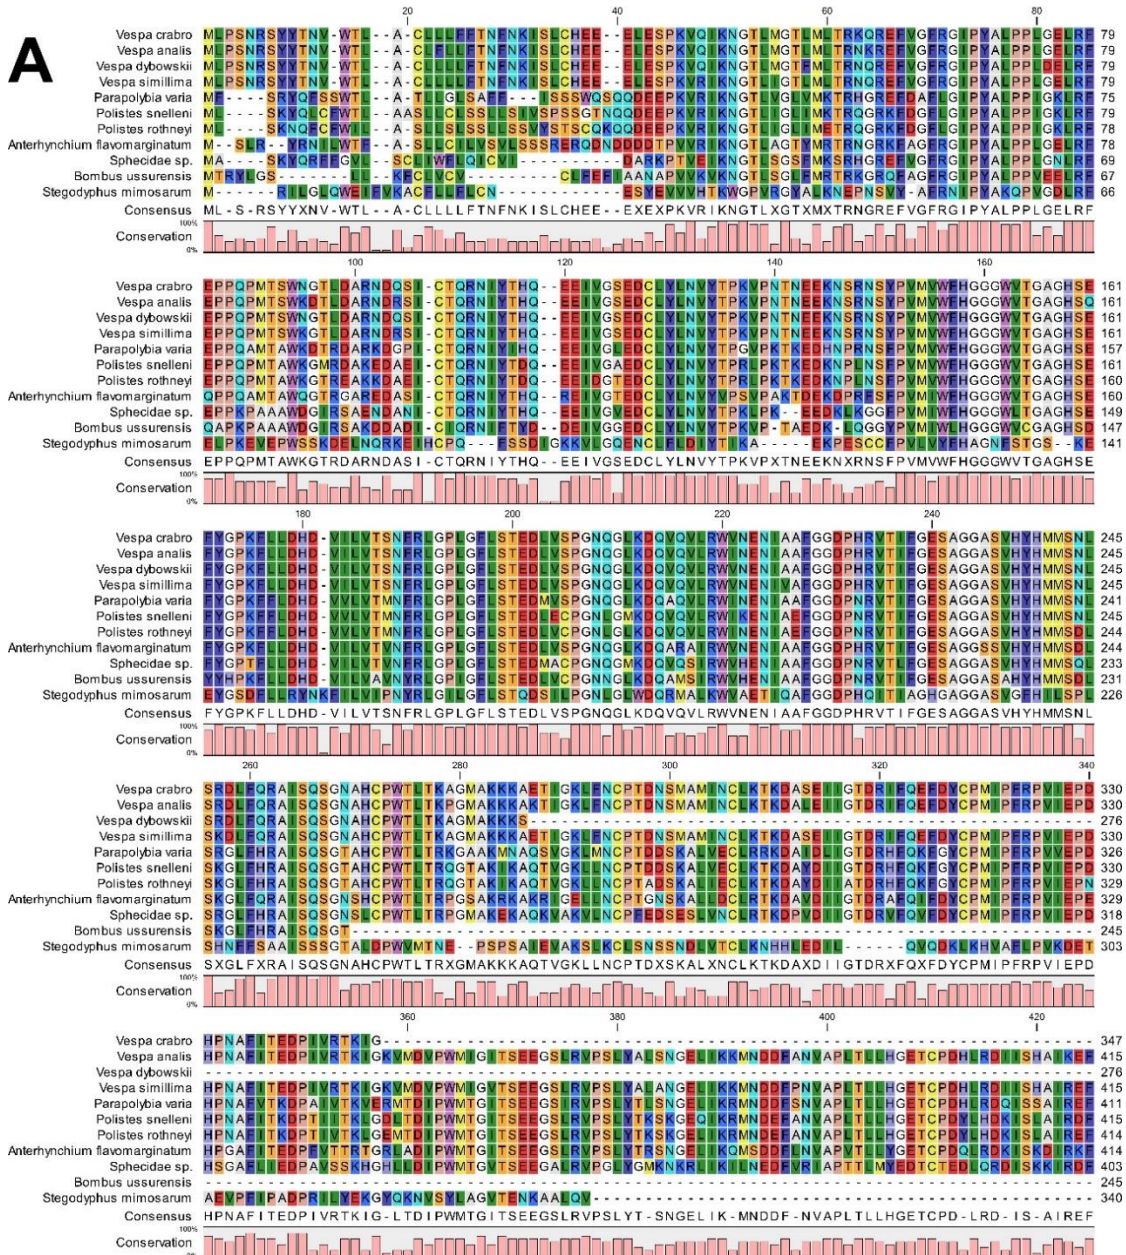

**A**

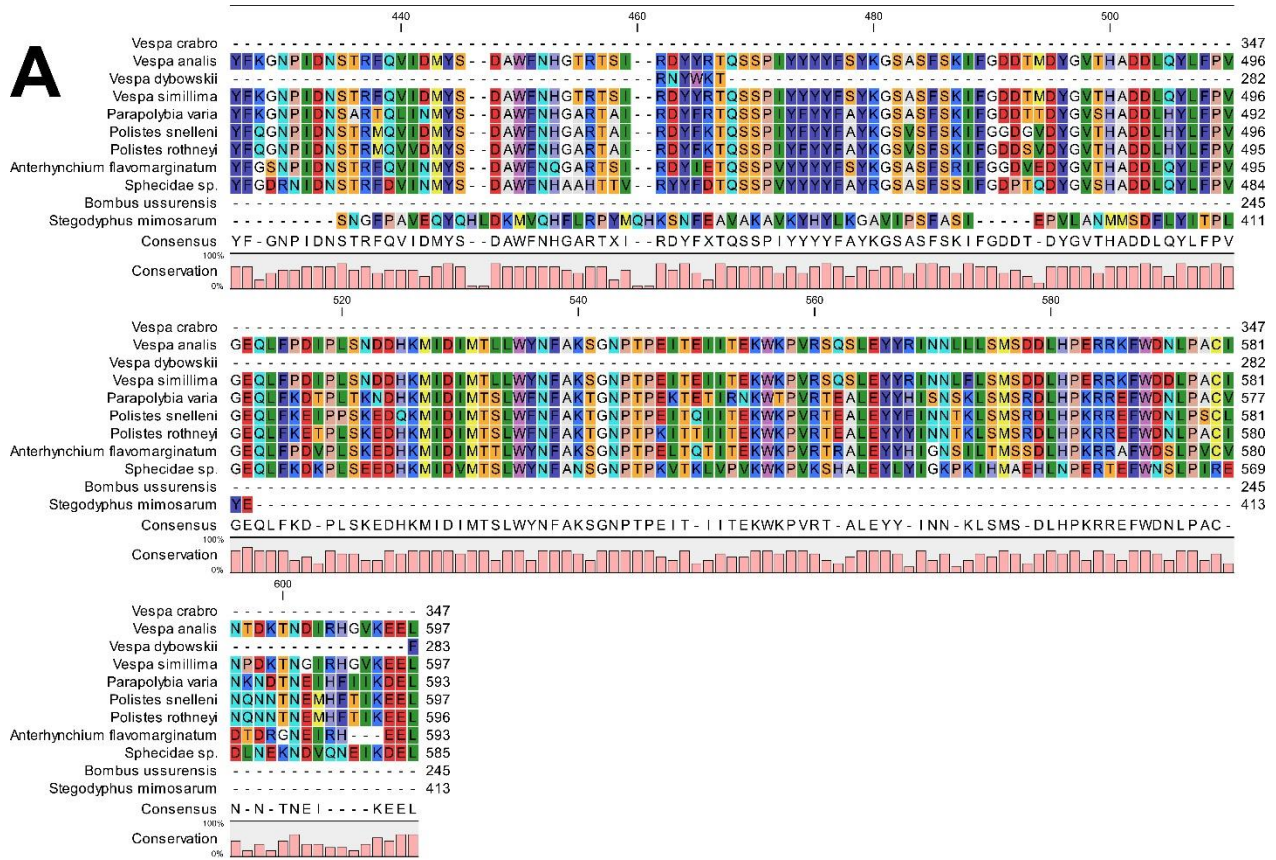

Figure S8B

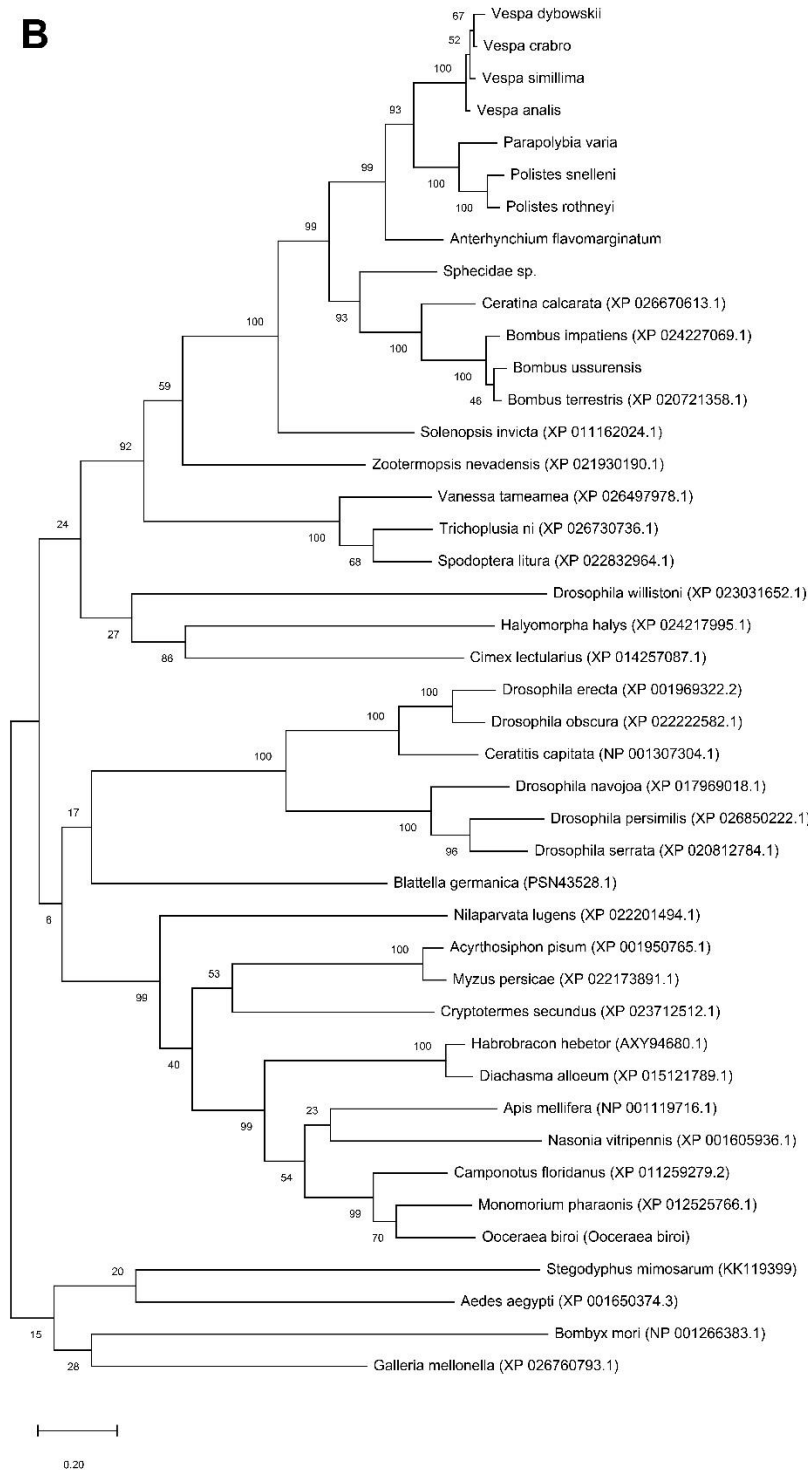

**Figure S8.** Amino acid alignments of carboxylesterase 6. A) Alignment of amino acid sequences from *V. crabro*, *V. analis*, *V. dybowskii*, *V. simillima*, *P. varia*, *P. snelleni*, *P. rothneyi*, *A. flavomarginatum*, *Sphecidae* sp., *B. ussurensis* and *S. mimosarum*. B) Phylogenetic analysis of carboxylesterase 6.



**A**

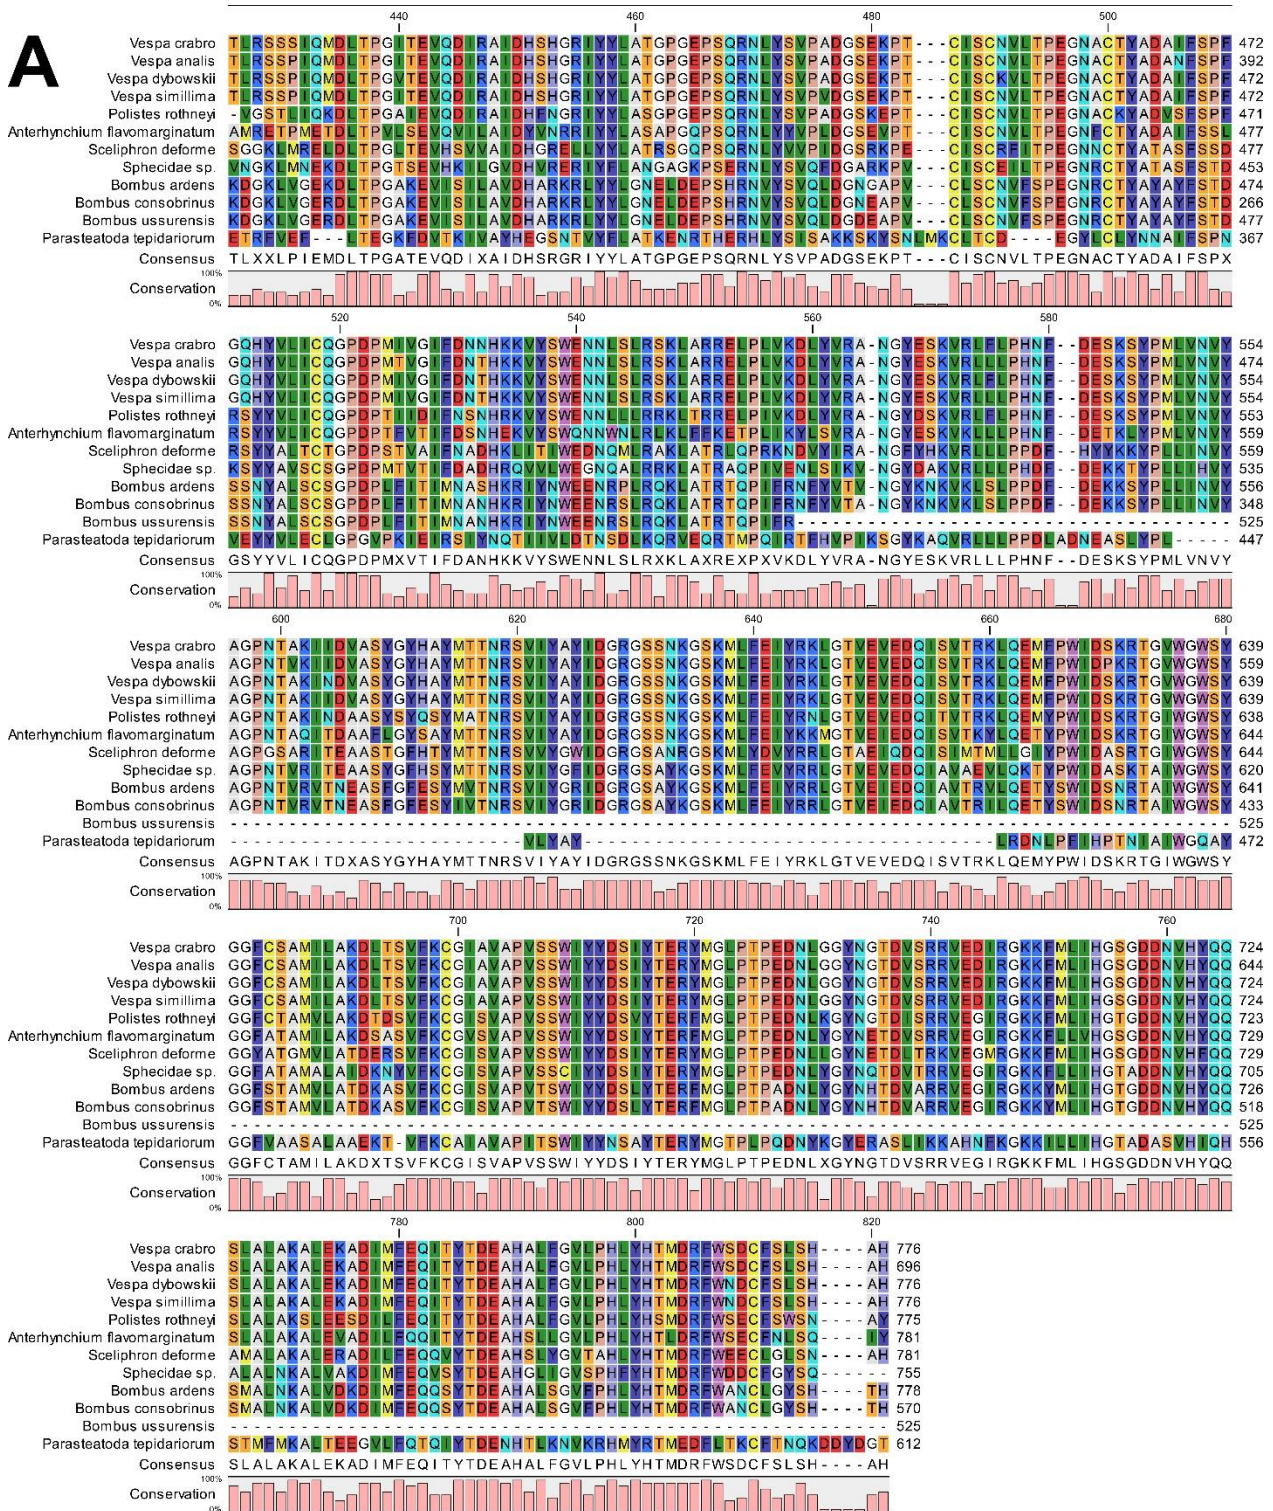



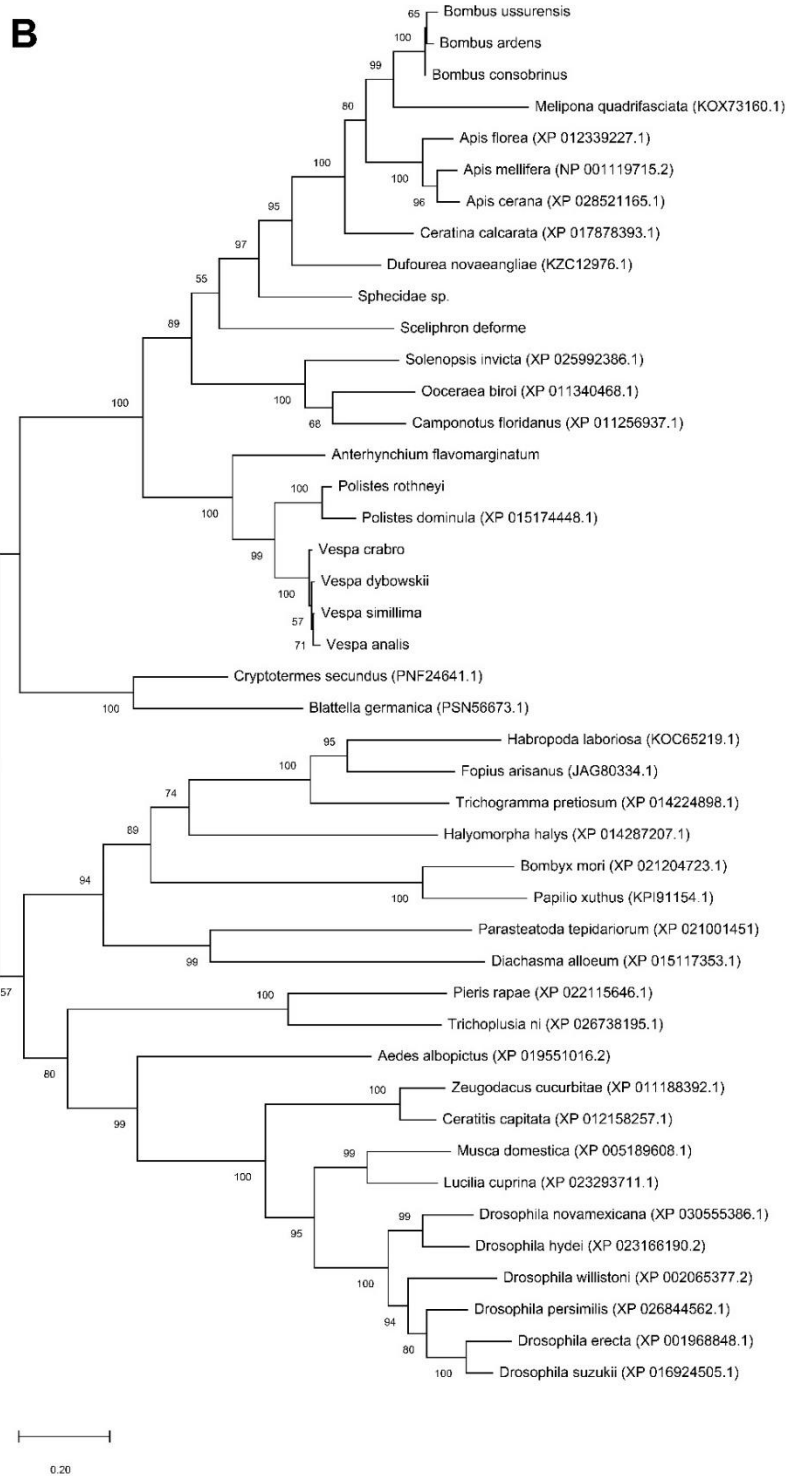

**Figure S9.** Amino acid alignments of dipeptidyl peptidase 4. A) Alignment of amino acid sequences from *V. crabro*, *V. analis*, *V. dybowskii*, *V. simillima*, *P. rothneyi*, *A. flavomarginatum*, *S. deforme*, *Sphecidae* sp., *B. ardens*, *B. consobrinus*, *B. ussurensis* and *P. tepidariorum*. B) Phylogenetic analysis of dipeptidyl peptidase 4.

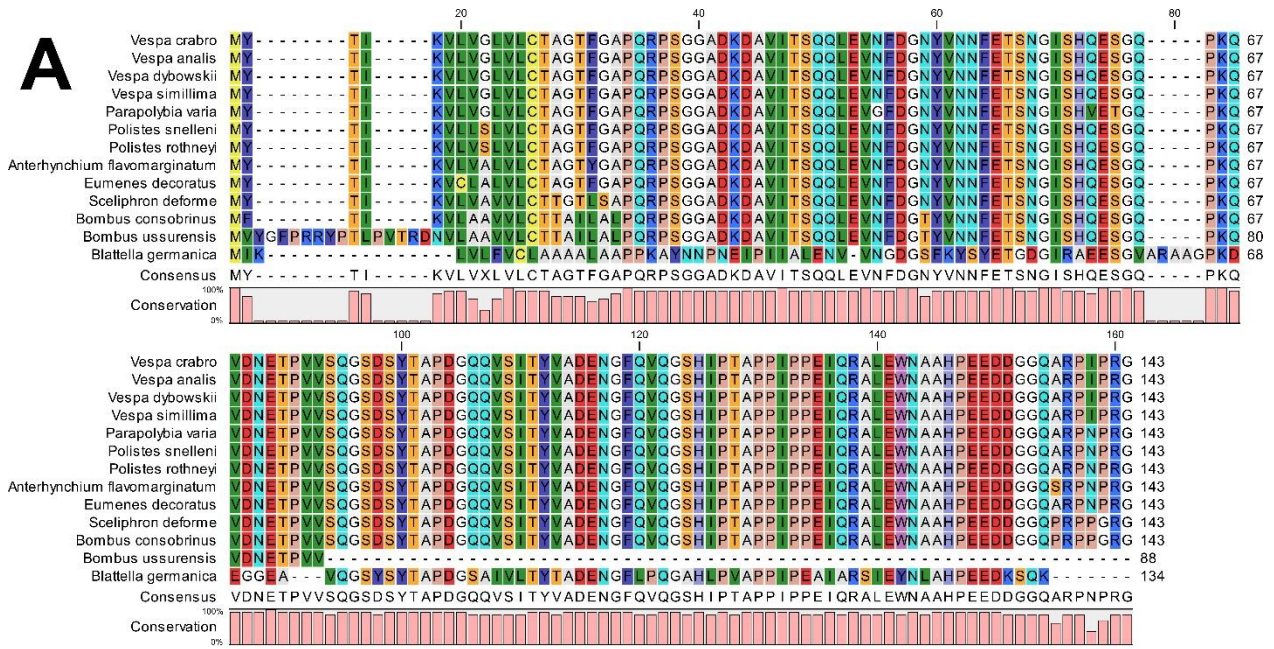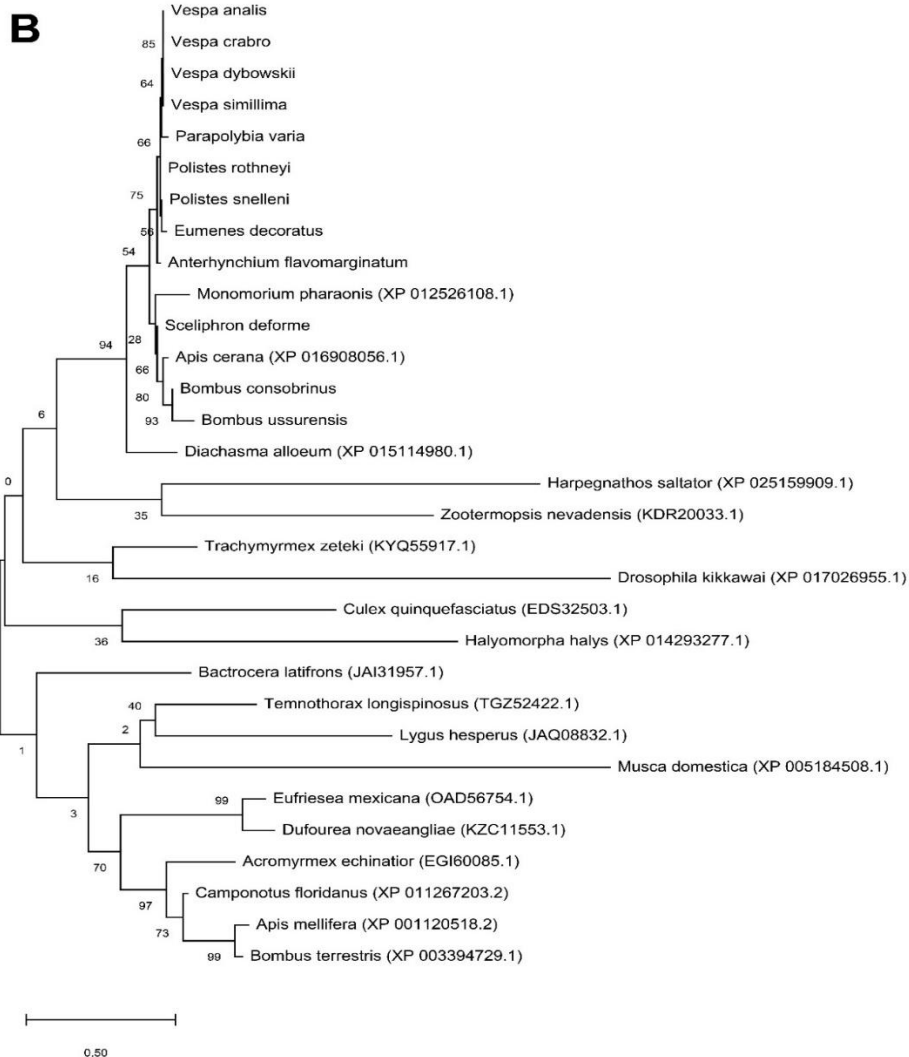



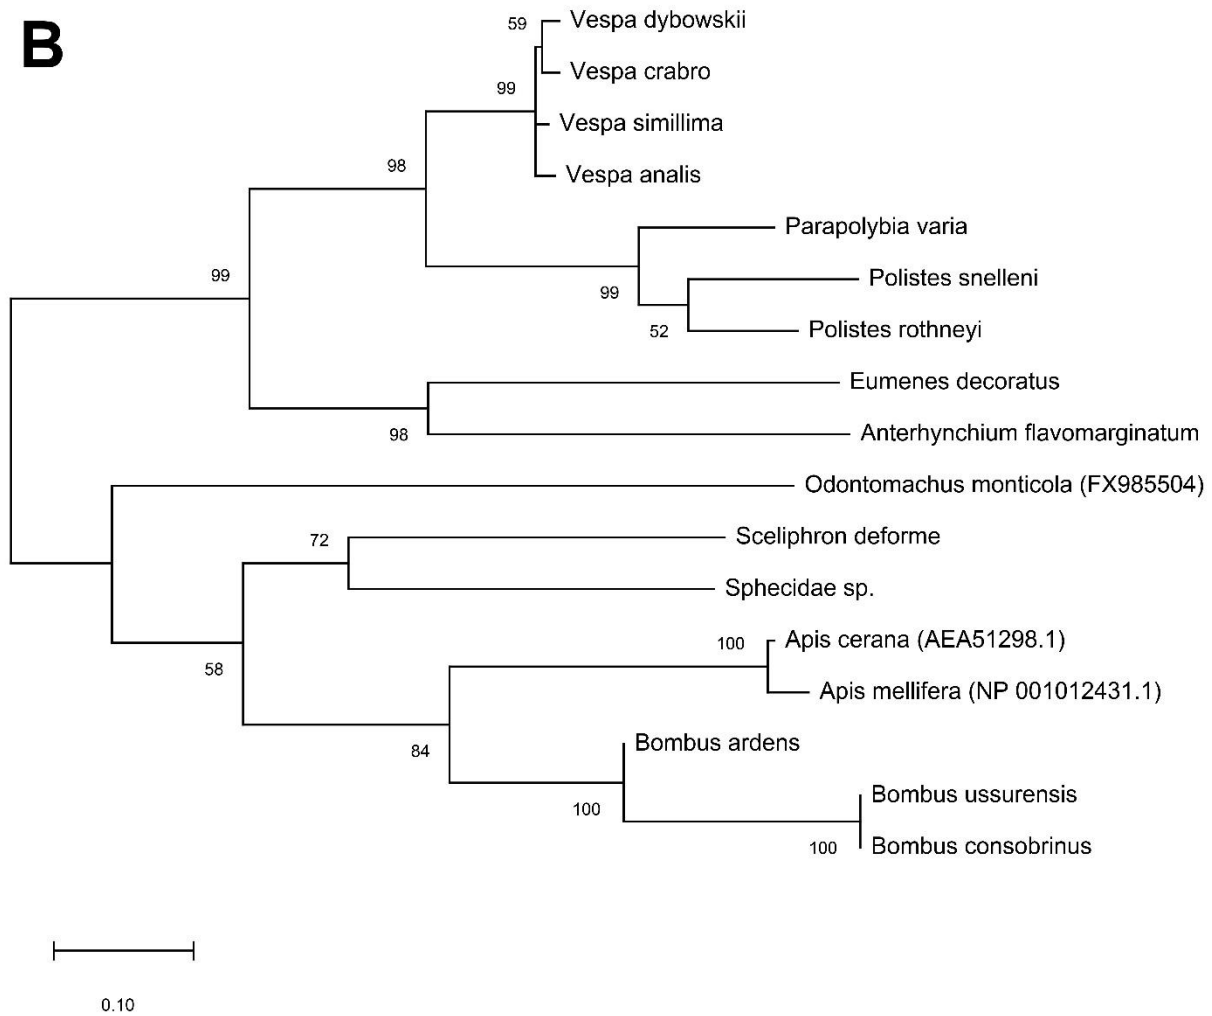

**Figure S11.** Amino acid alignments of icarapin. A) Alignment of amino acid sequences from *V. crabro*, *V. analis*, *V. dybowskii*, *V. simillima*, *P. varia*, *P. snelleni*, *P. rothneyi*, *A. flavomarginatum*, *E. decoratus*, *S. deforme*, *Sphecidae* sp., *B. ardens*, *B. consobrinus*, *B. ussurensis* and *O. monticola*. B) Phylogenetic analysis of icarapin.



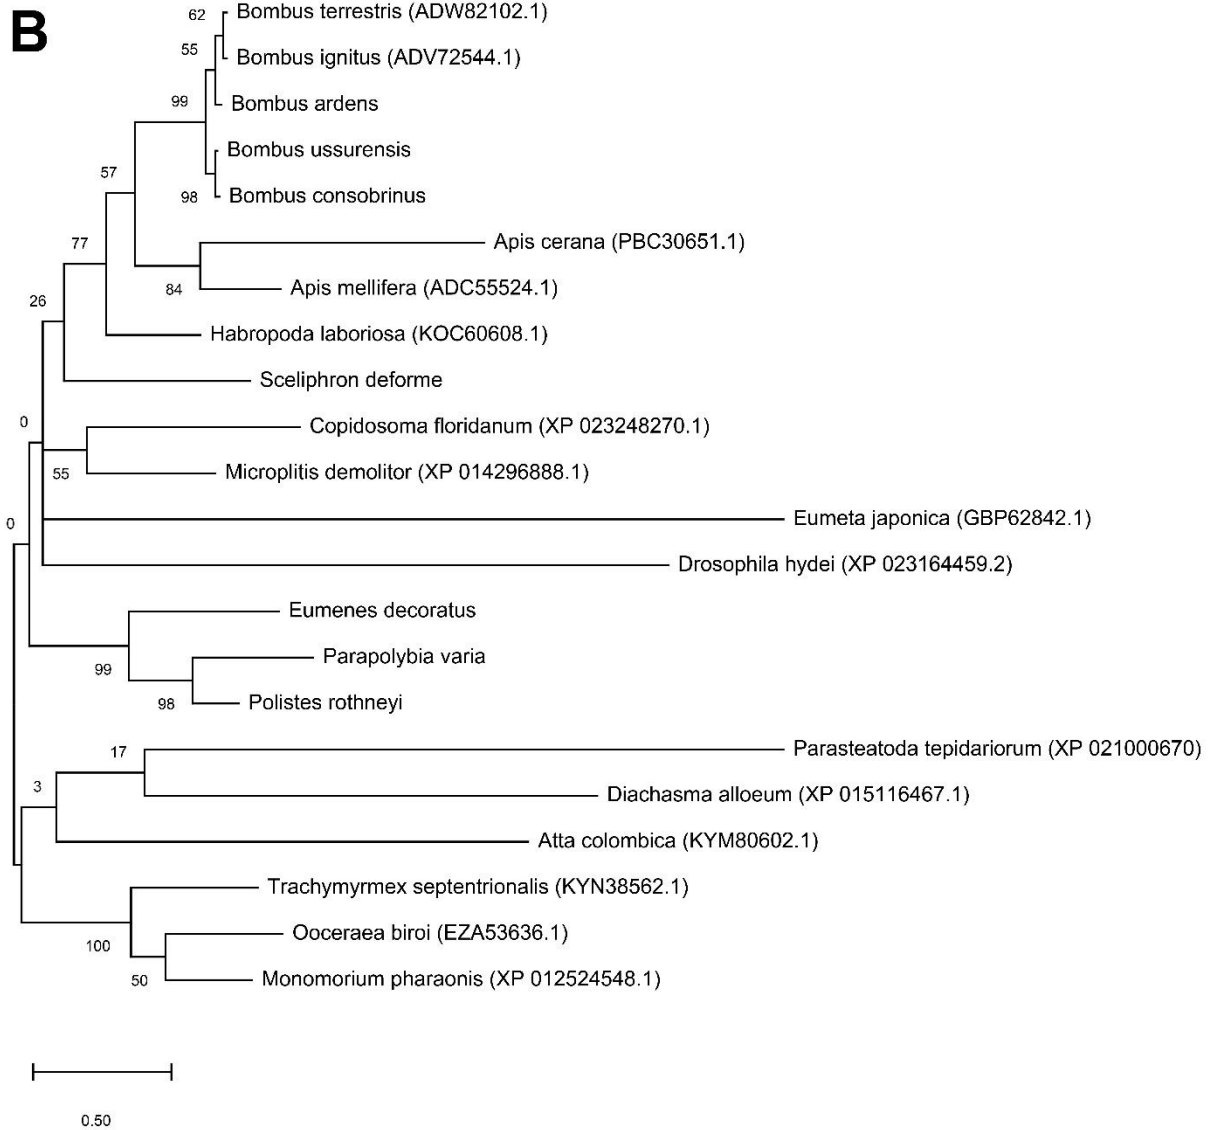

**Figure S12.** Amino acid alignments of major royal jelly protein. A) Alignment of amino acid sequences from *P. varia*, *P. rothneyi*, *E. decoratus*, *S. deforme*, *B. ardens*, *B. consobrinus*, *B. ussurensis* and *P. tepidariorum*. B) Phylogenetic analysis of major royal jelly protein.

**A**

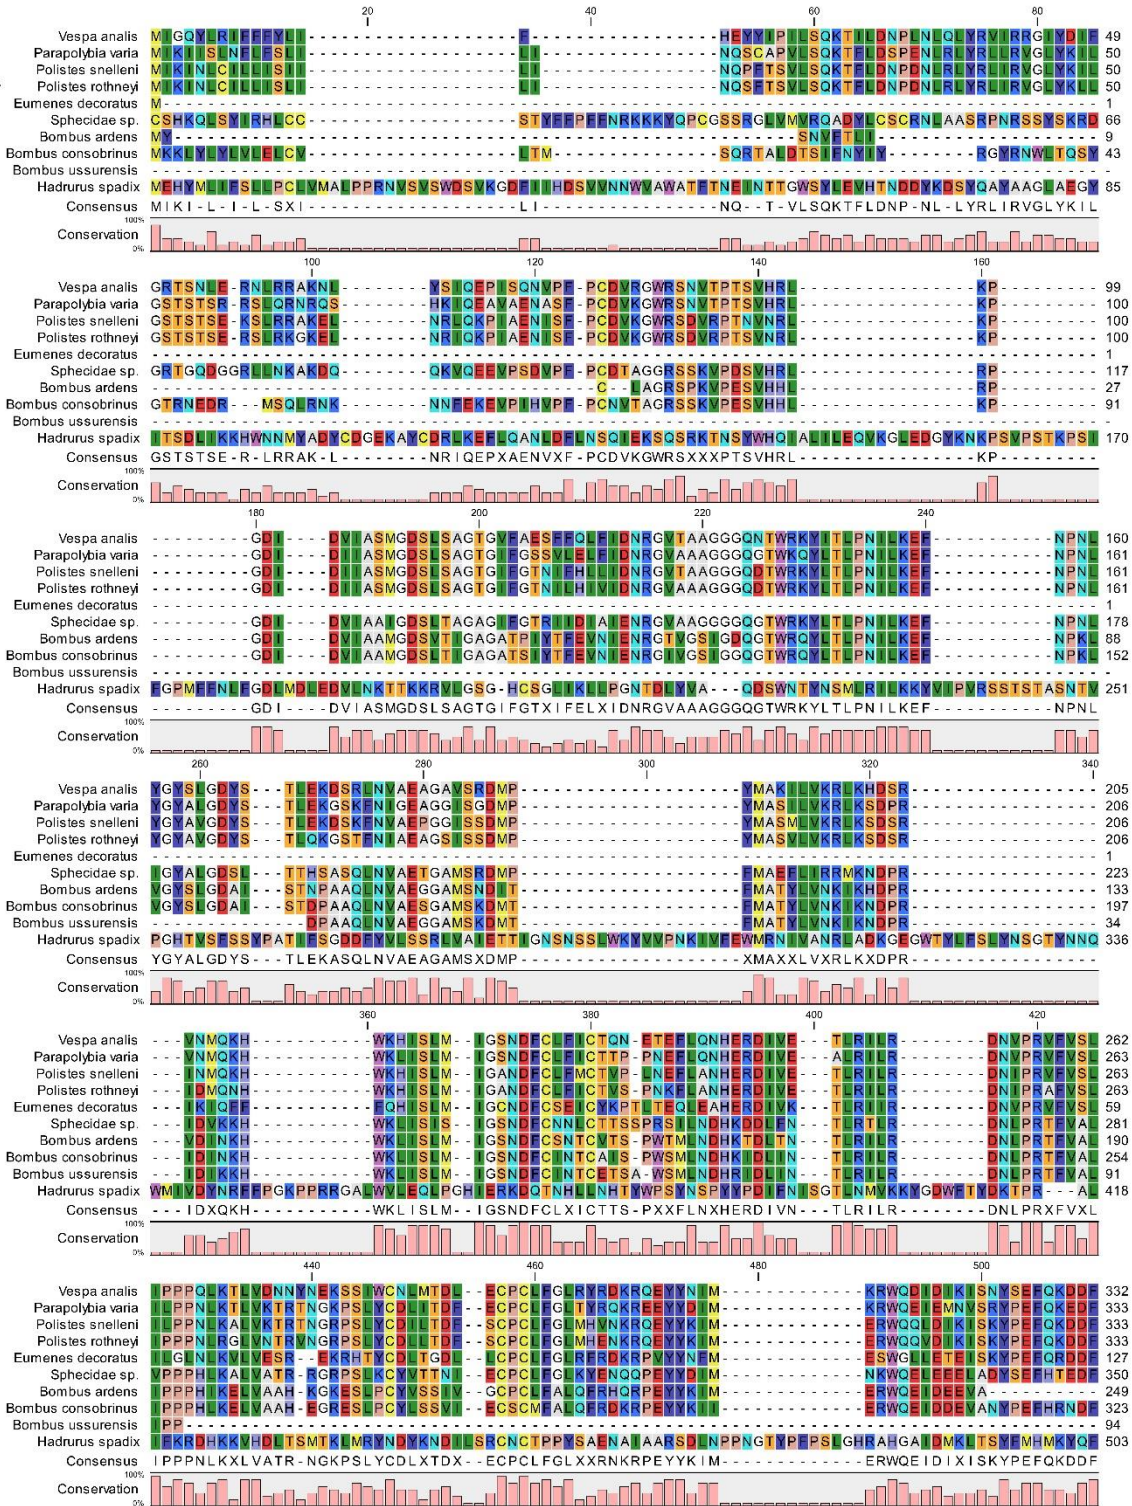

Figure S13A-2

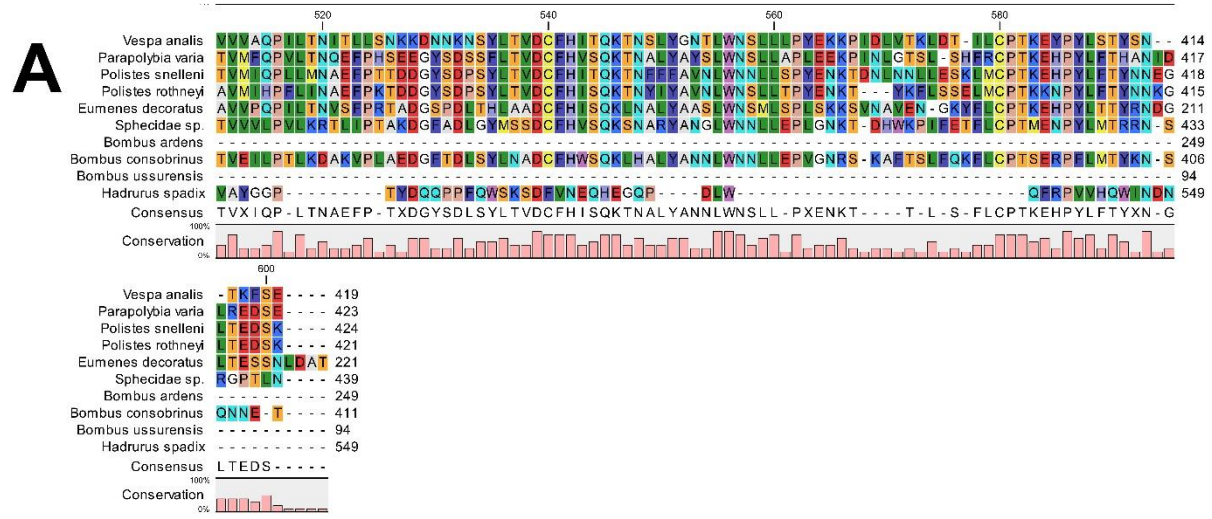



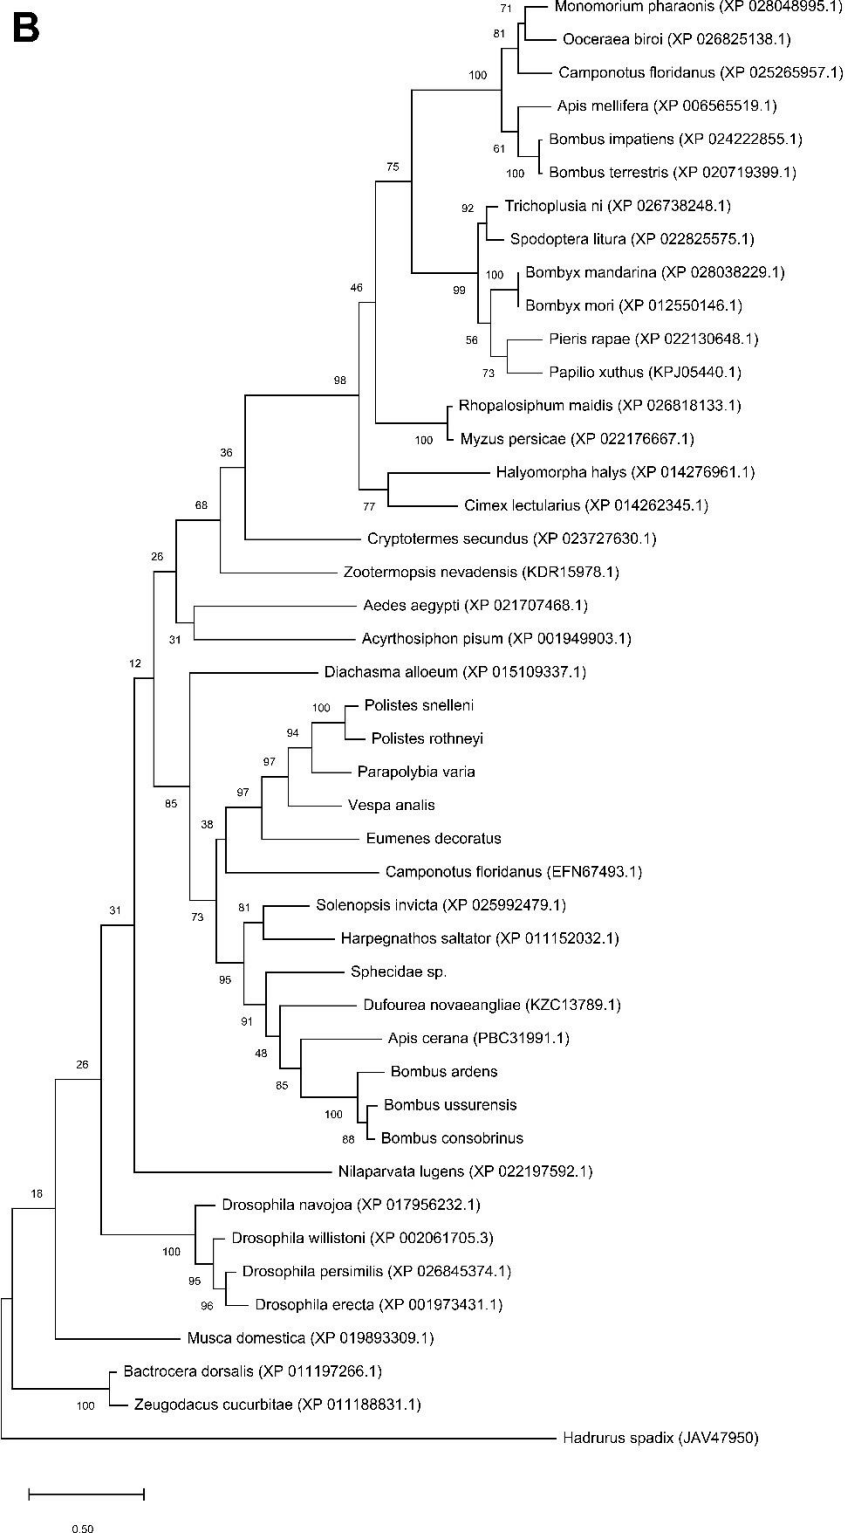

**Figure S13.** Amino acid alignments of phospholipase B. A) Alignment of amino acid sequences from *V. analis*, *P. varia*, *P. snelleni*, *P. rothneyi*, *E. decoratus*, *Sphecidae* sp., *B. ardens*, *B. consobrinus*, *B. ussurensis* and *H. spadix*. B) Phylogenetic analysis of phospholipase B.



**A**

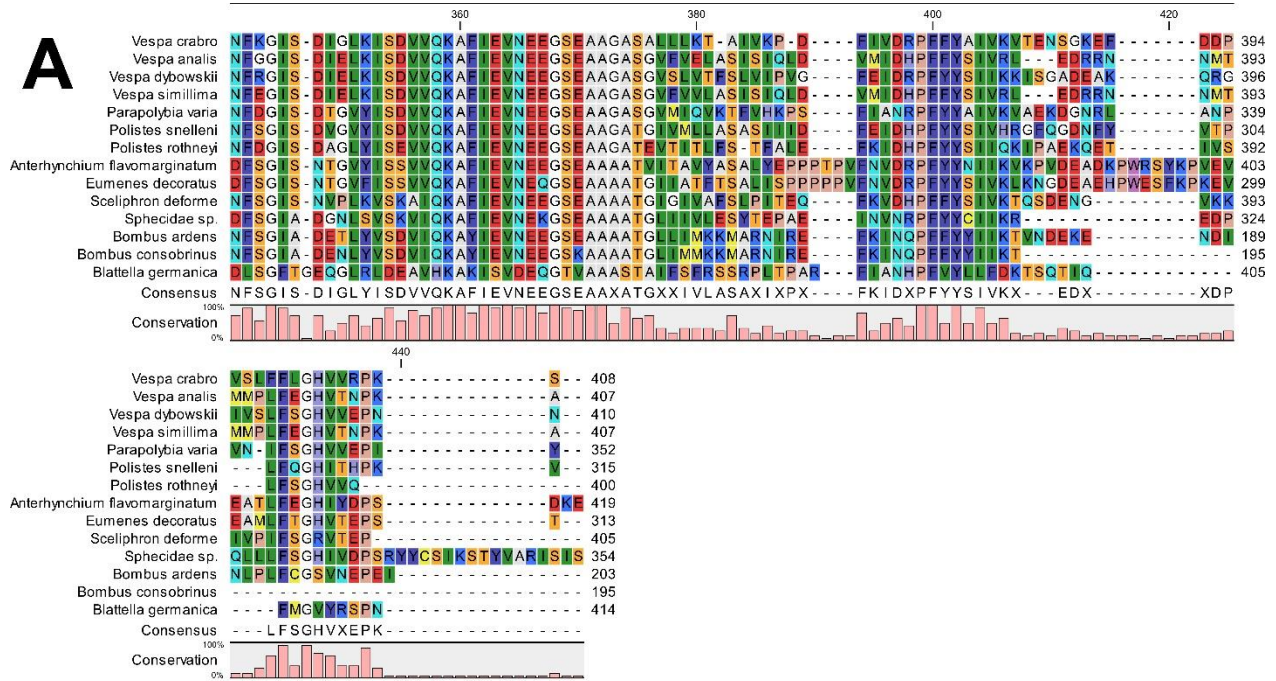

Figure S14B

**B**

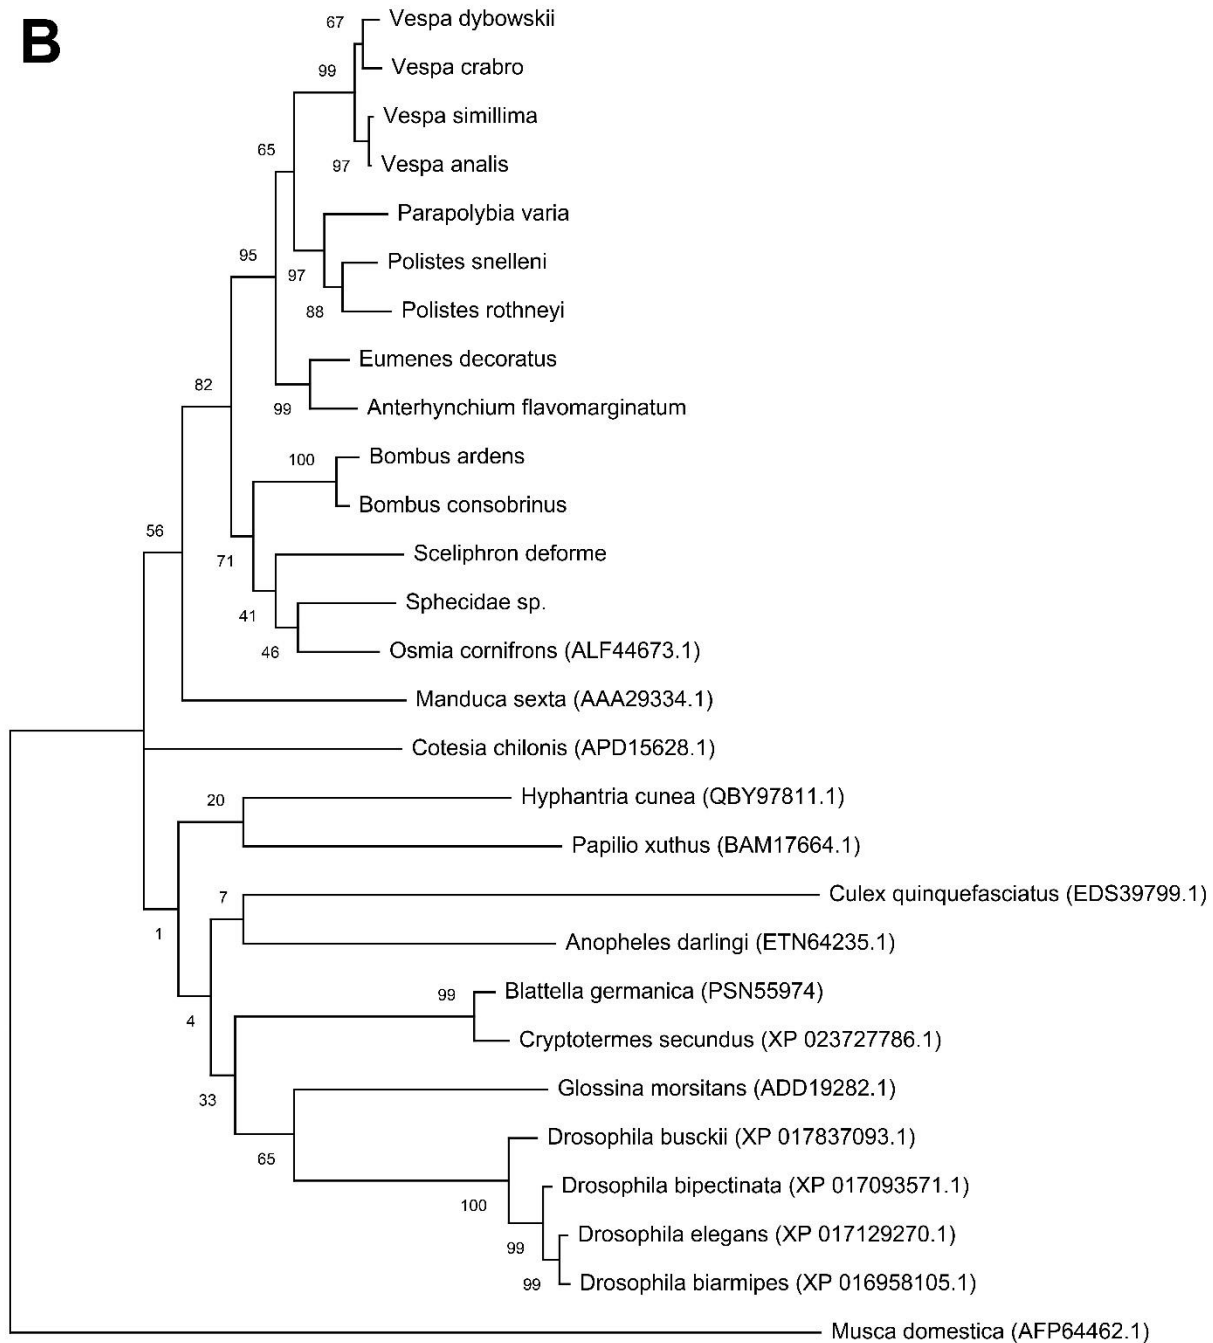

0.50

**Figure S14.** Amino acid alignments of serine protease inhibitor. A) Alignment of amino acid sequences from *V. crabro*, *V. analis*, *V. dybowskii*, *V. simillima*, *P. varia*, *P. snelleni*, *P. rothneyi*, *A. flavomarginatum*, *E. decoratus*, *S. deforme*, *Sphecidae* sp., *B. ardens*, *B. consobrinus* and *B. germanica*. B) Phylogenetic analysis of serine protease inhibitor.

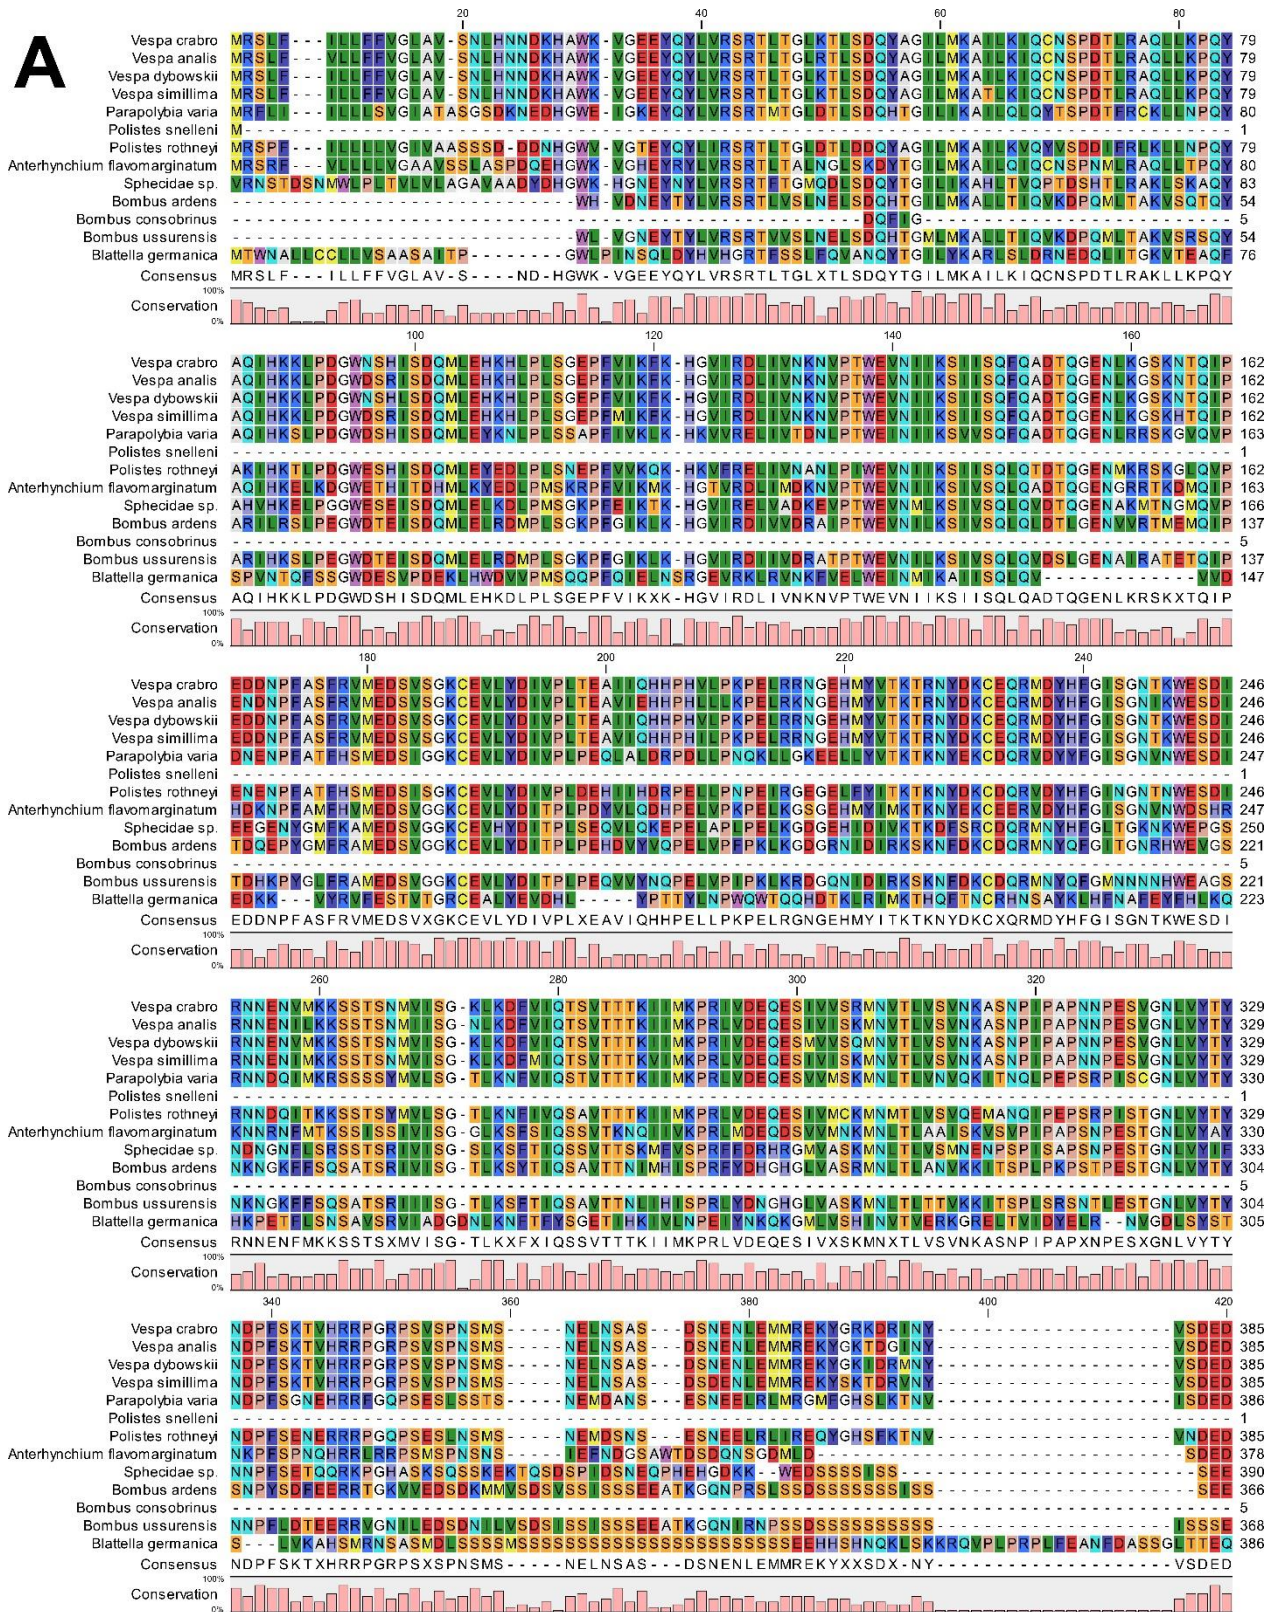

**A**

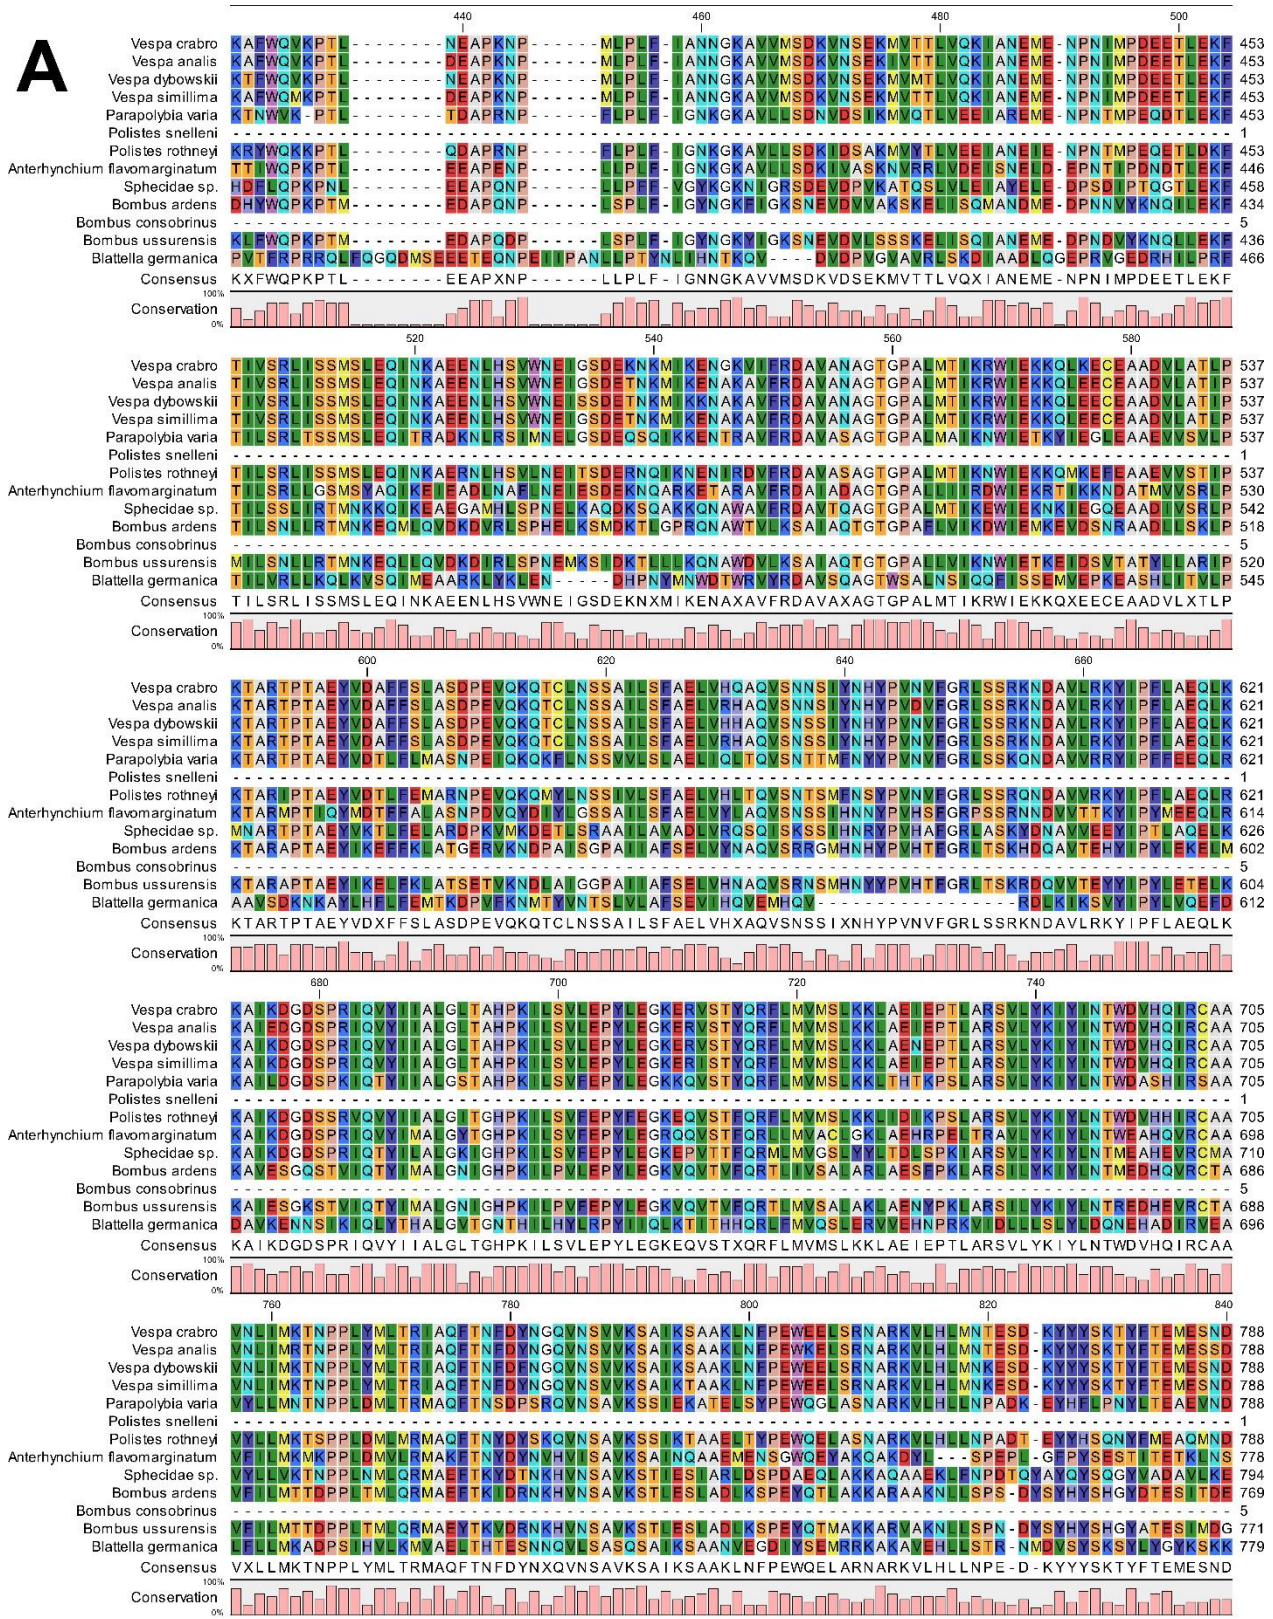

**A**

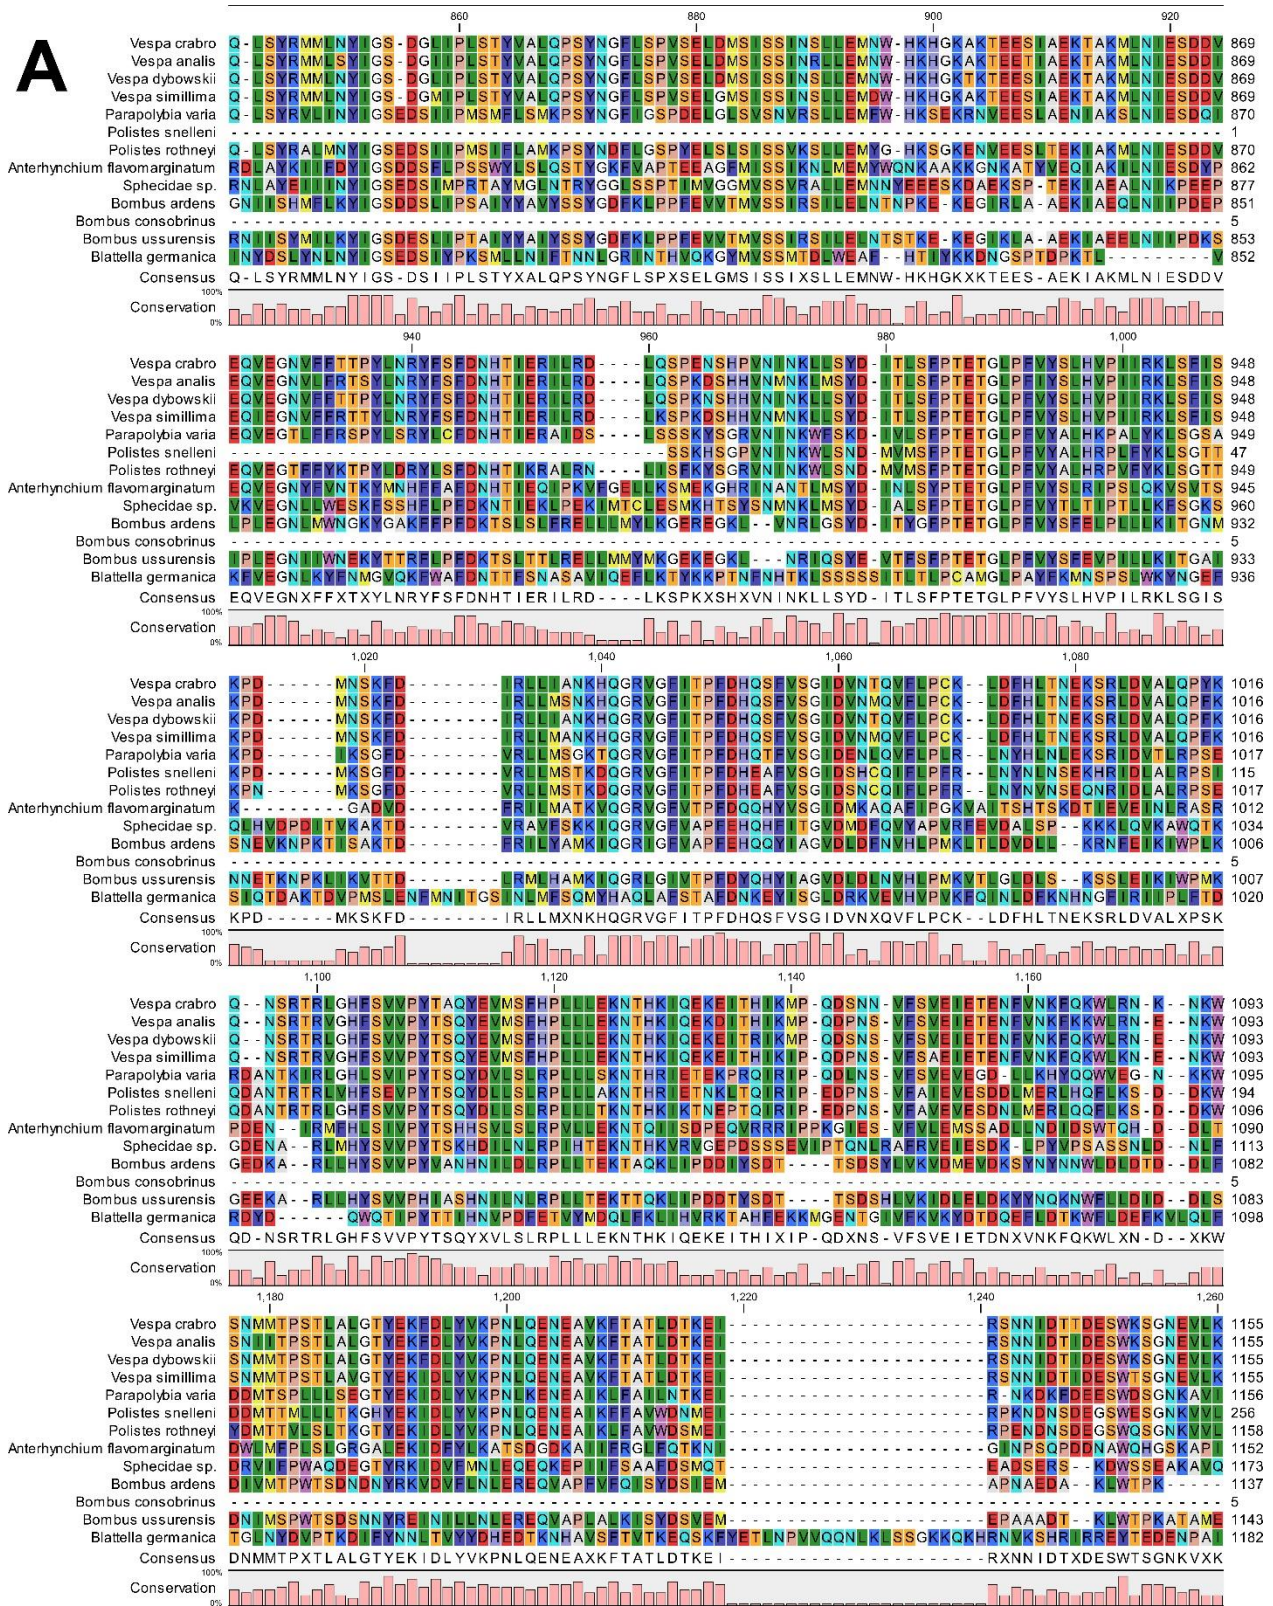

**A**

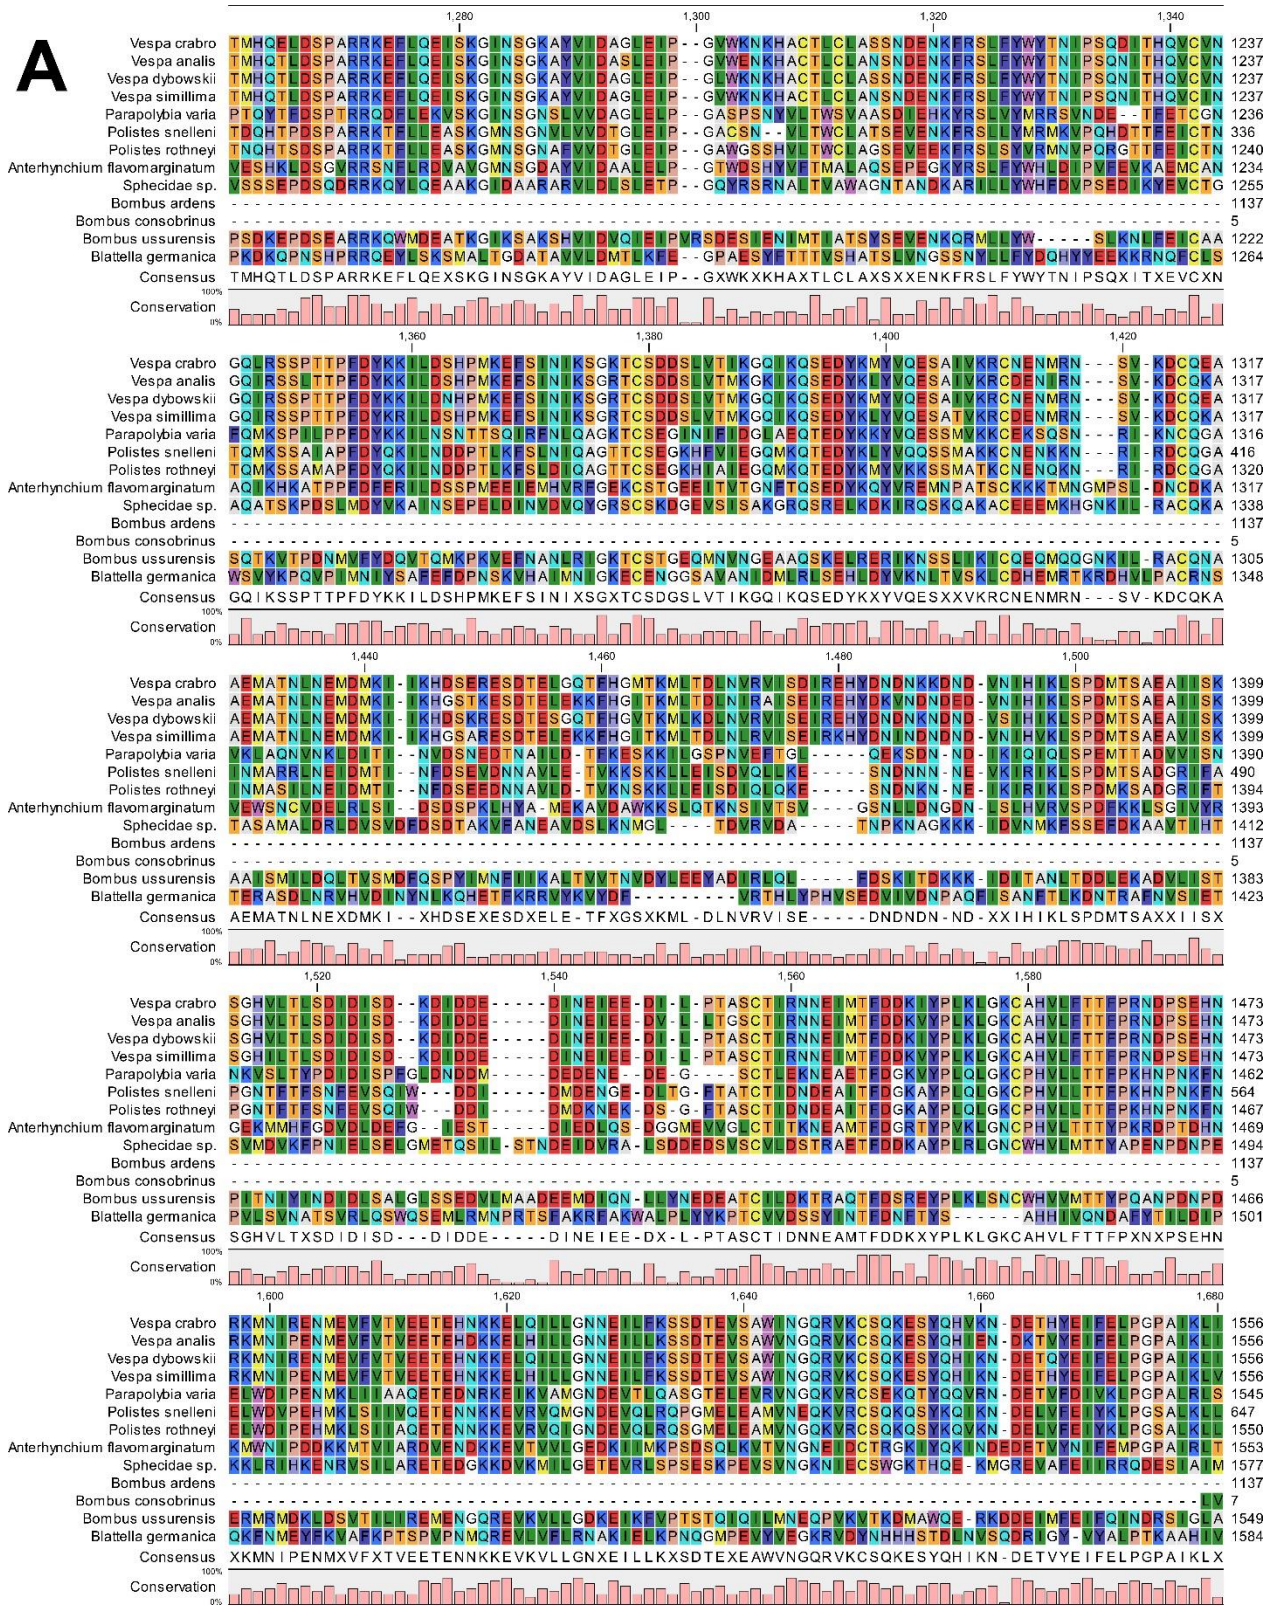





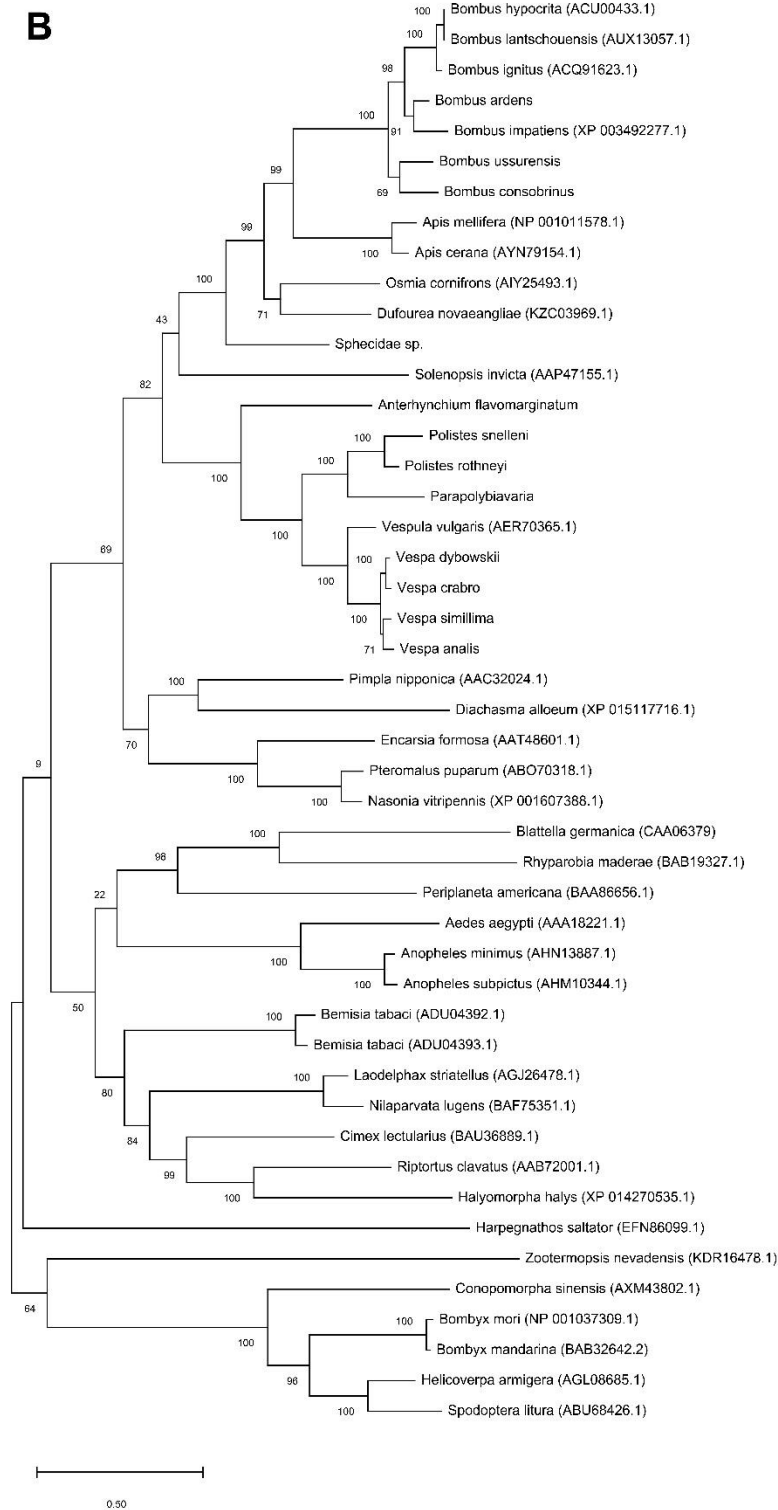

**Figure S15.** Amino acid alignments of vitellogenin. A) Alignment of amino acid sequences from *V. crabro*, *V. analis*, *V. dybowskii*, *V. simillima*, *P. varia*, *P. snelleni*, *P. rothneyi*, *A. flavomarginatum*, *Sphecidae* sp., *B. ardens*, *B. consobrinus*, *B. ussurensis* and *B. germanica*. B) Phylogenetic analysis of vitellogenin.

**A**

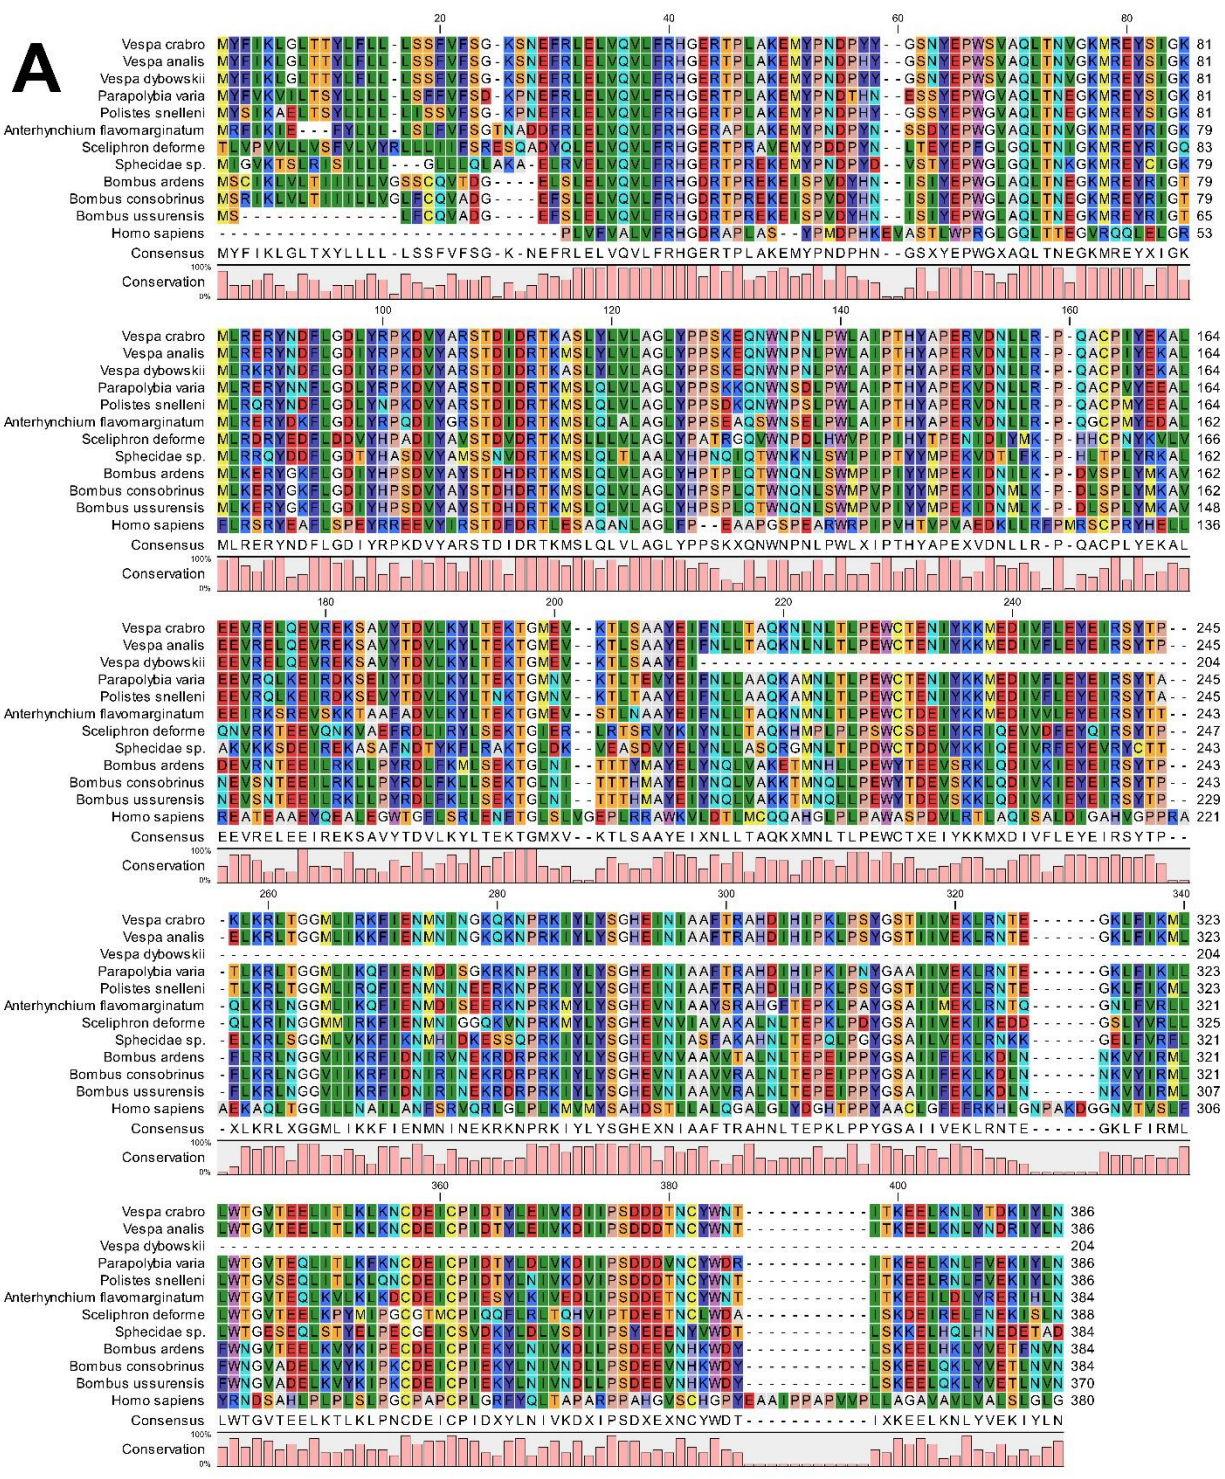

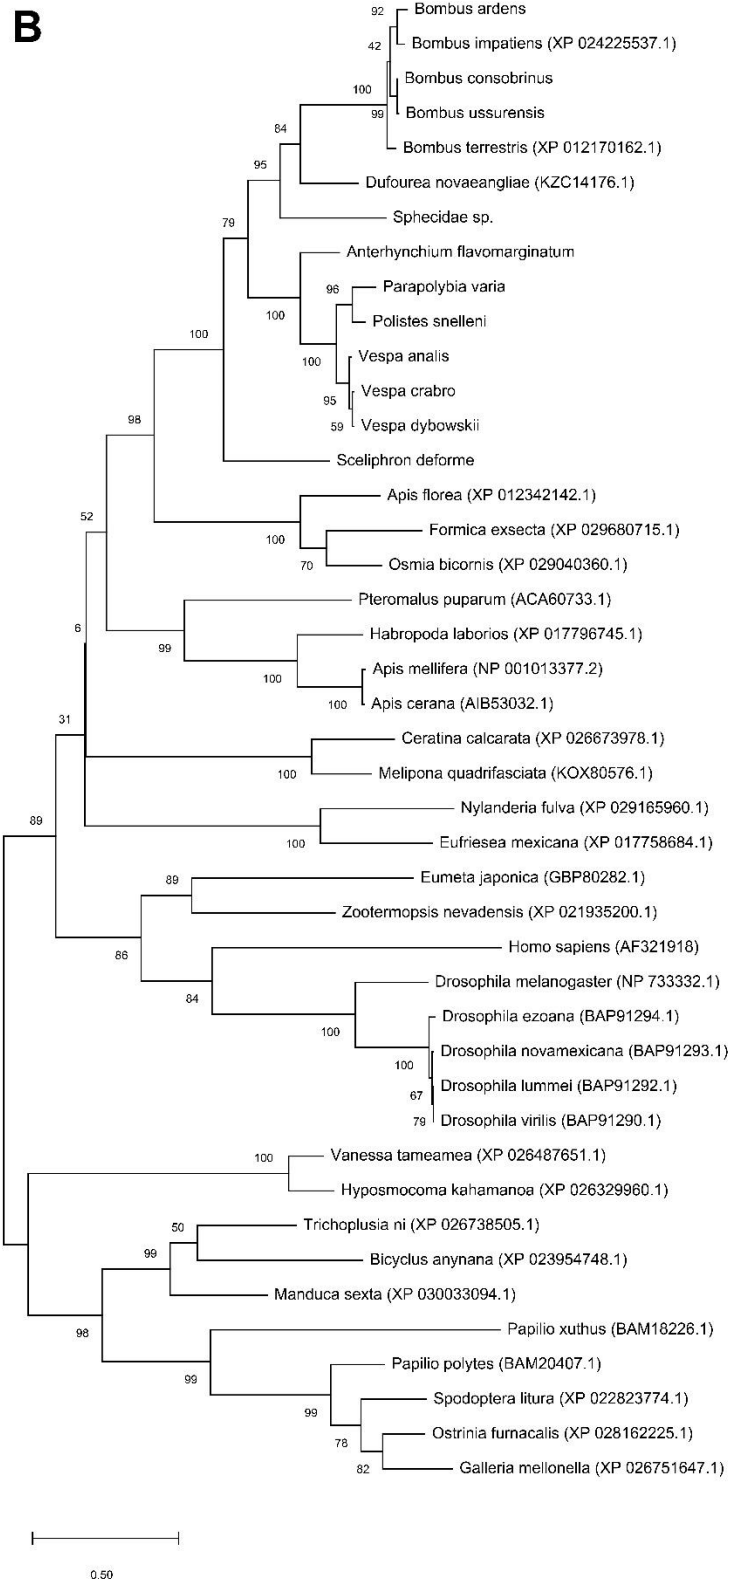

**Figure S16.** Amino acid alignments of acid phosphatase. A) Alignment of amino acid sequences from *V. crabro*, *V. analis*, *V. dybowskii*, *P. varia*, *P. snelleni*, *A. flavomarginatum*, *S. deforme*, *Sphecidae* sp., *B. ardens*, *B. consobrinus*, *B. ussurensis* and *H. sapiens*. B) Phylogenetic analysis of acid phosphatase.

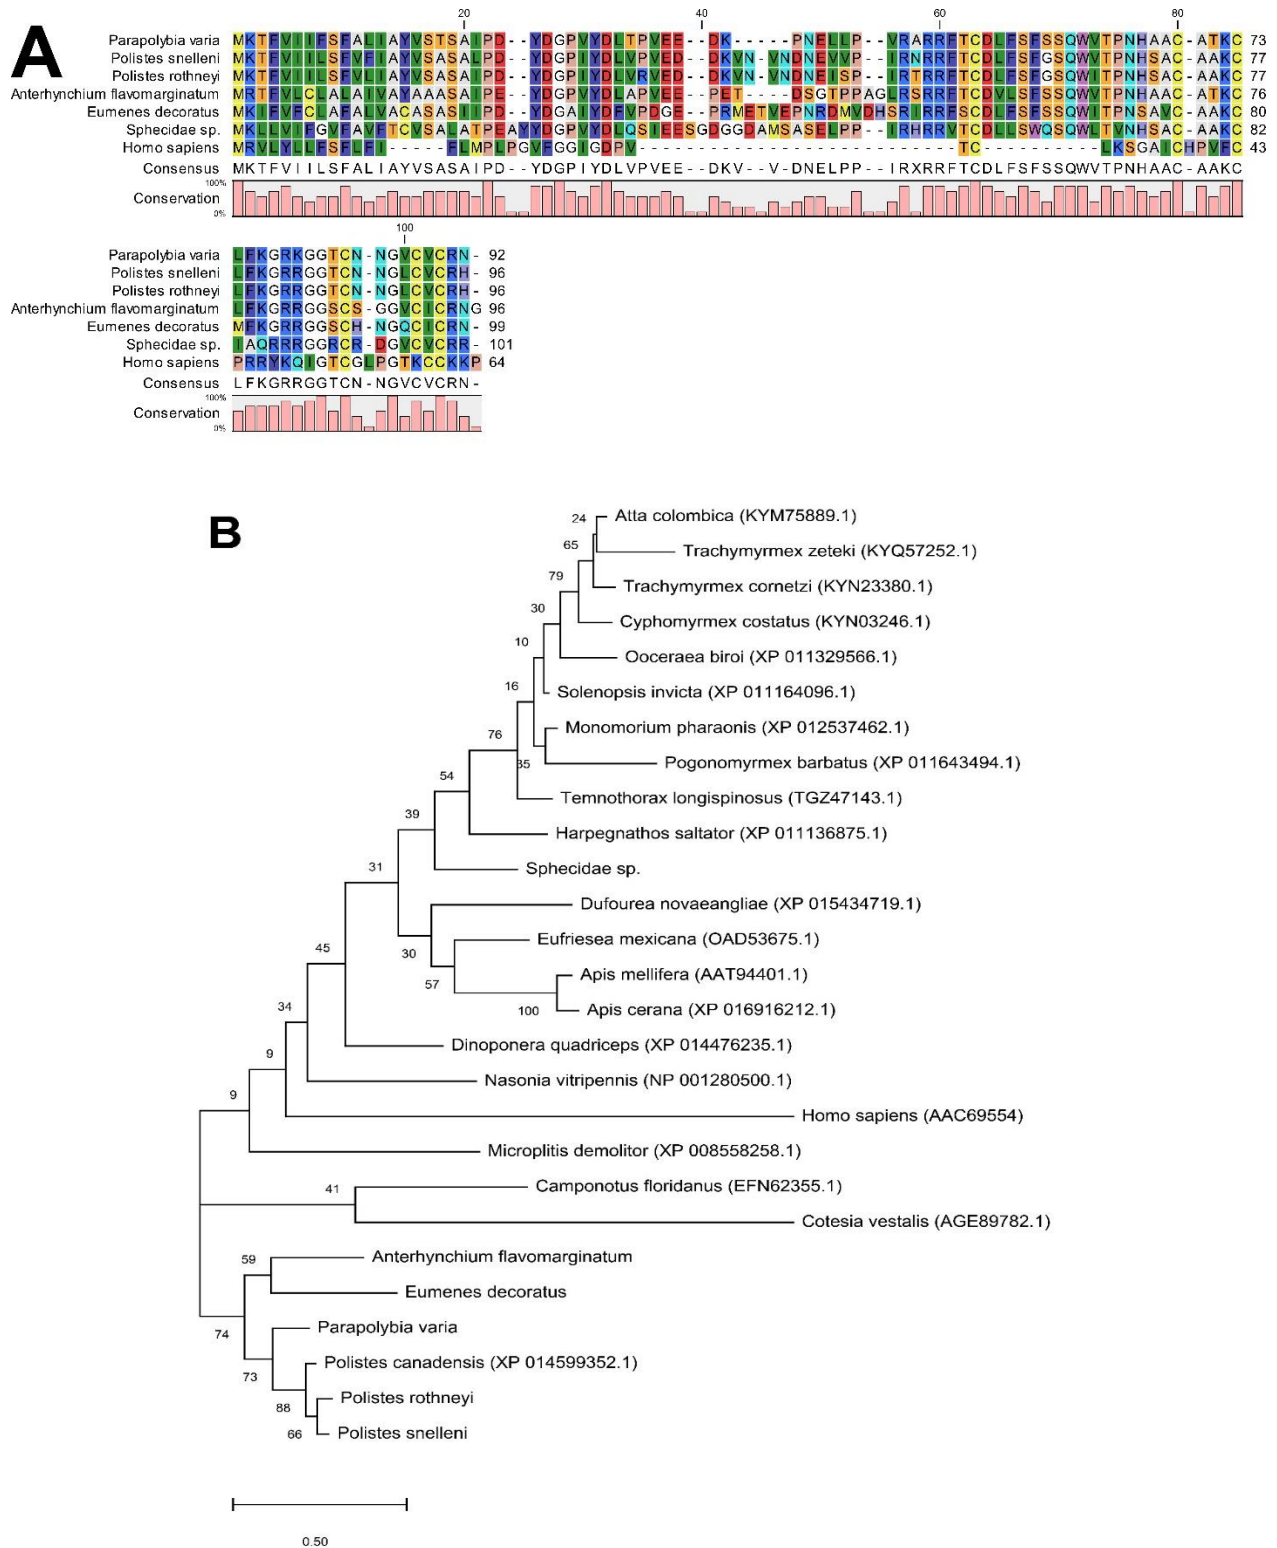

**Figure S17.** Amino acid alignments of defensin 2. A) Alignment of amino acid sequences from *P. varia*, *P. snelleni*, *P. rothneyi*, *A. flavomarginatum*, *E. decoratus*, *Sphecidae* sp. and *H. sapiens*. B) Phylogenetic analysis of defensin 2.



**B**

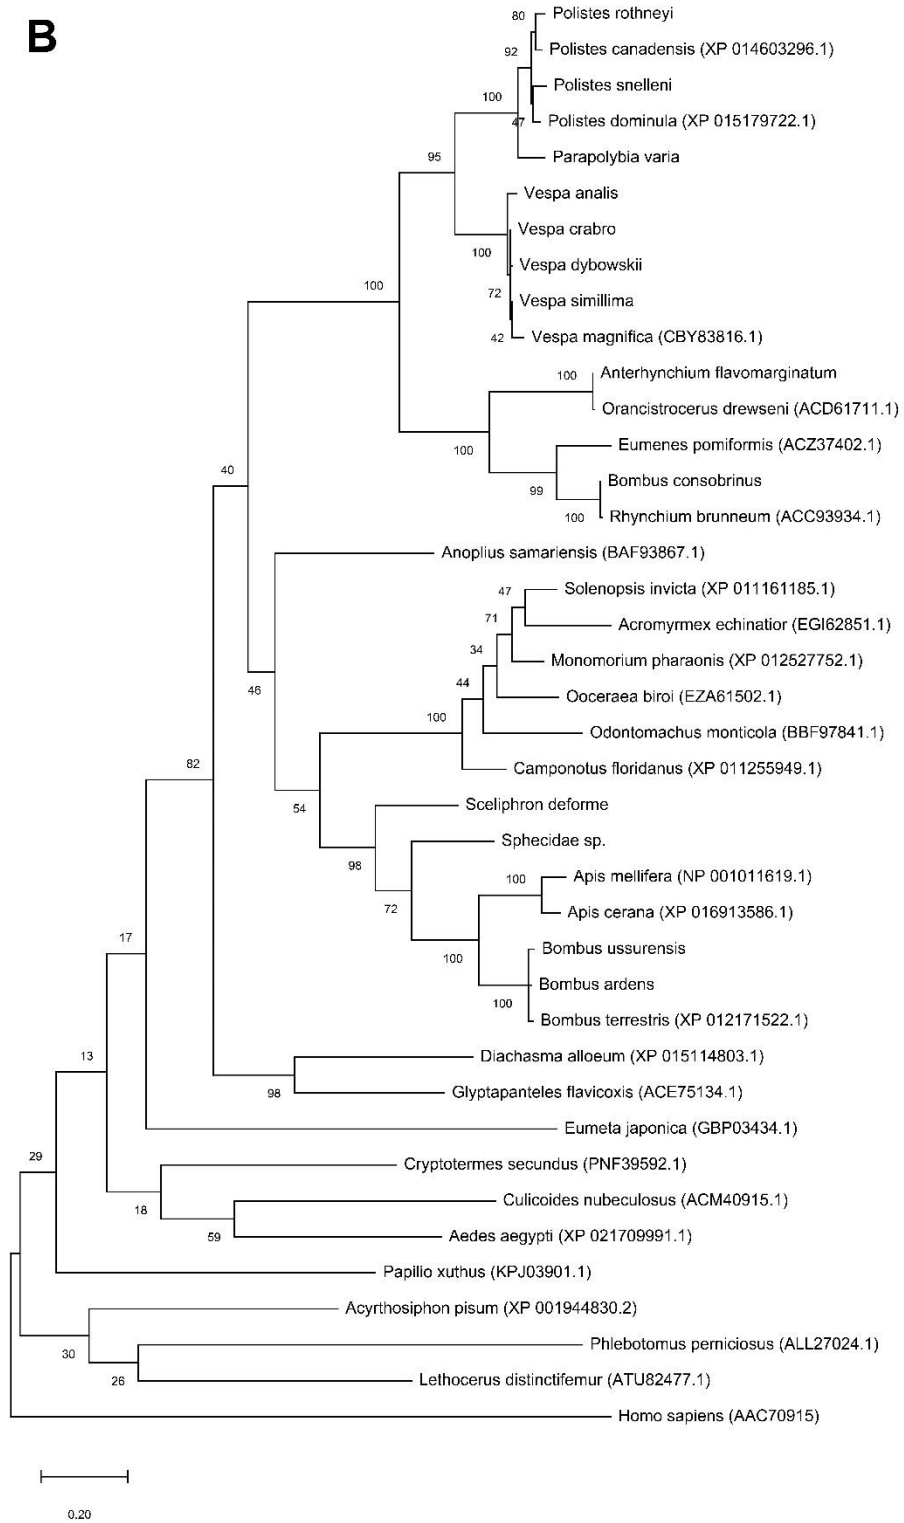

**Figure S18.** Amino acid alignments of hyaluronidase. A) Alignment of amino acid sequences from *V. crabro*, *V. analis*, *V. dybowskii*, *V. simillima*, *P. varia*, *P. snelleni*, *P. rothneyi*, *A. flavomarginatum*, *S. deforme*, *Sphecidae* sp., *B. ardens*, *B. ussurensis* and *H. sapiens*. B) Phylogenetic analysis of hyaluronidase.





**Figure S19.** Amino acid alignments of mastoparan. A) Alignment of amino acid sequences from *V. crabro*, *V. analis*, *P. snelleni*, *P. rothneyi*, *A. flavomarginatum*, *S. deforme*, *B. ussurensis* and uncultured bacterium. B) Phylogenetic analysis of mastoparan.

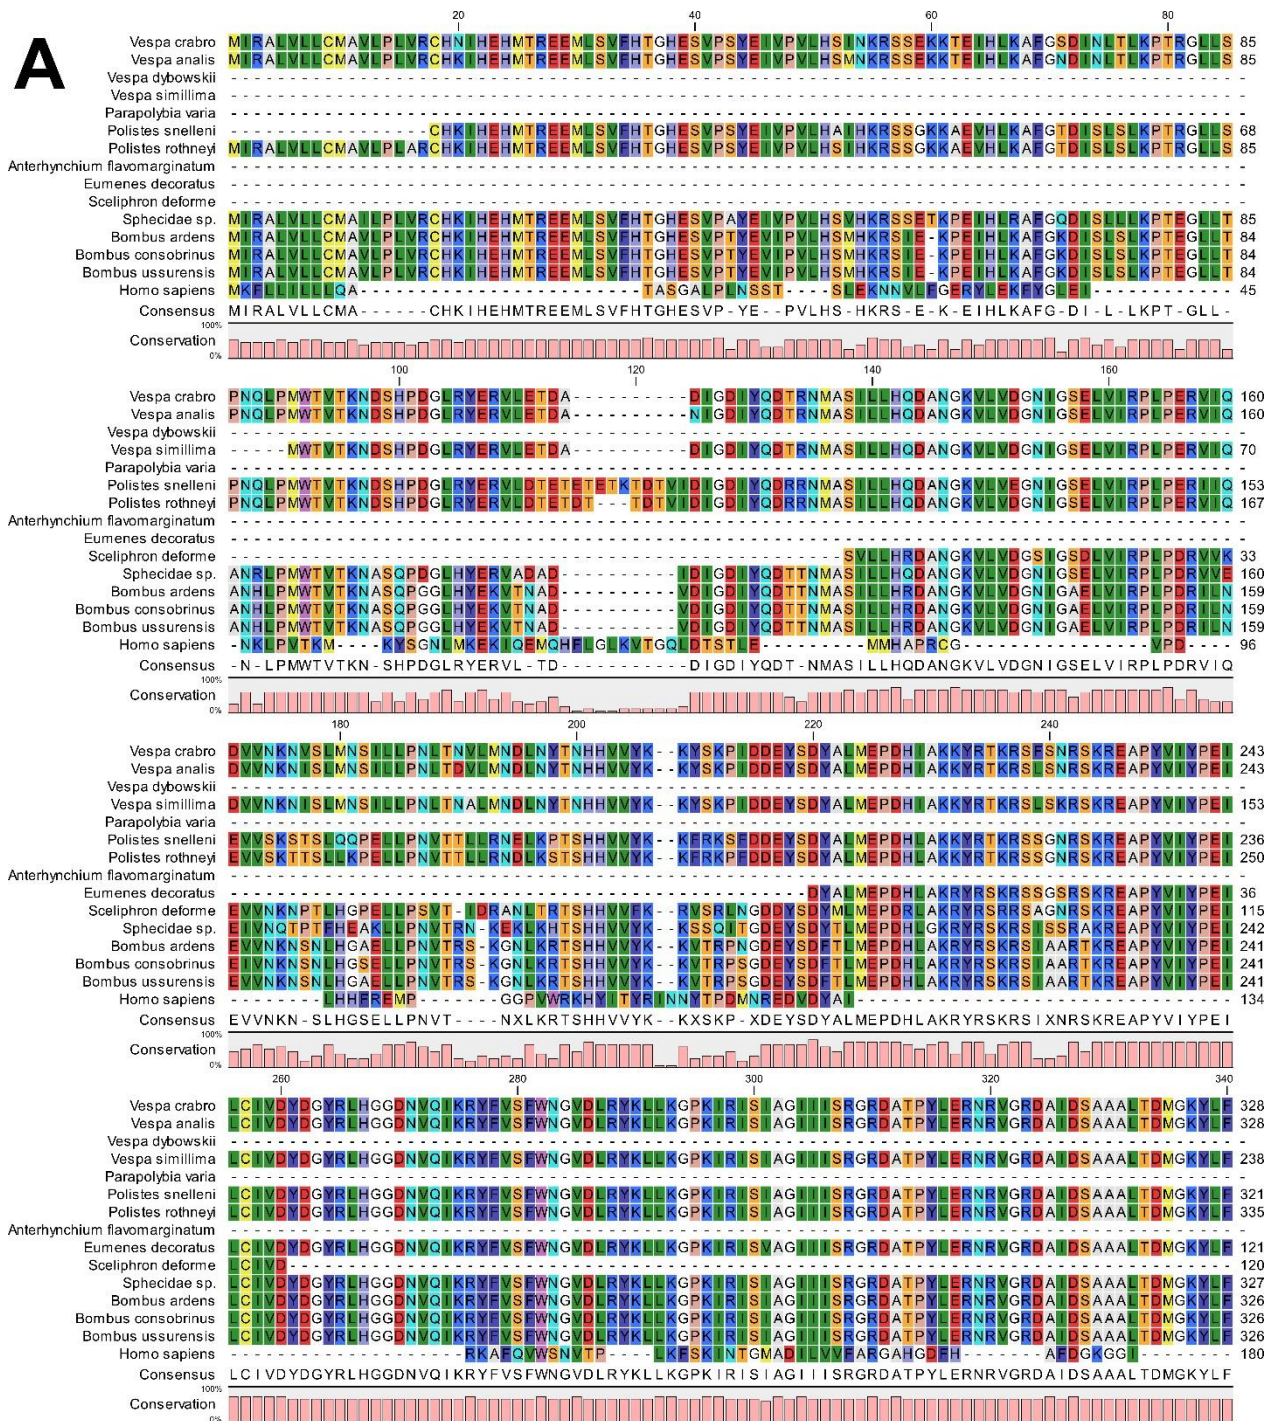

**A**

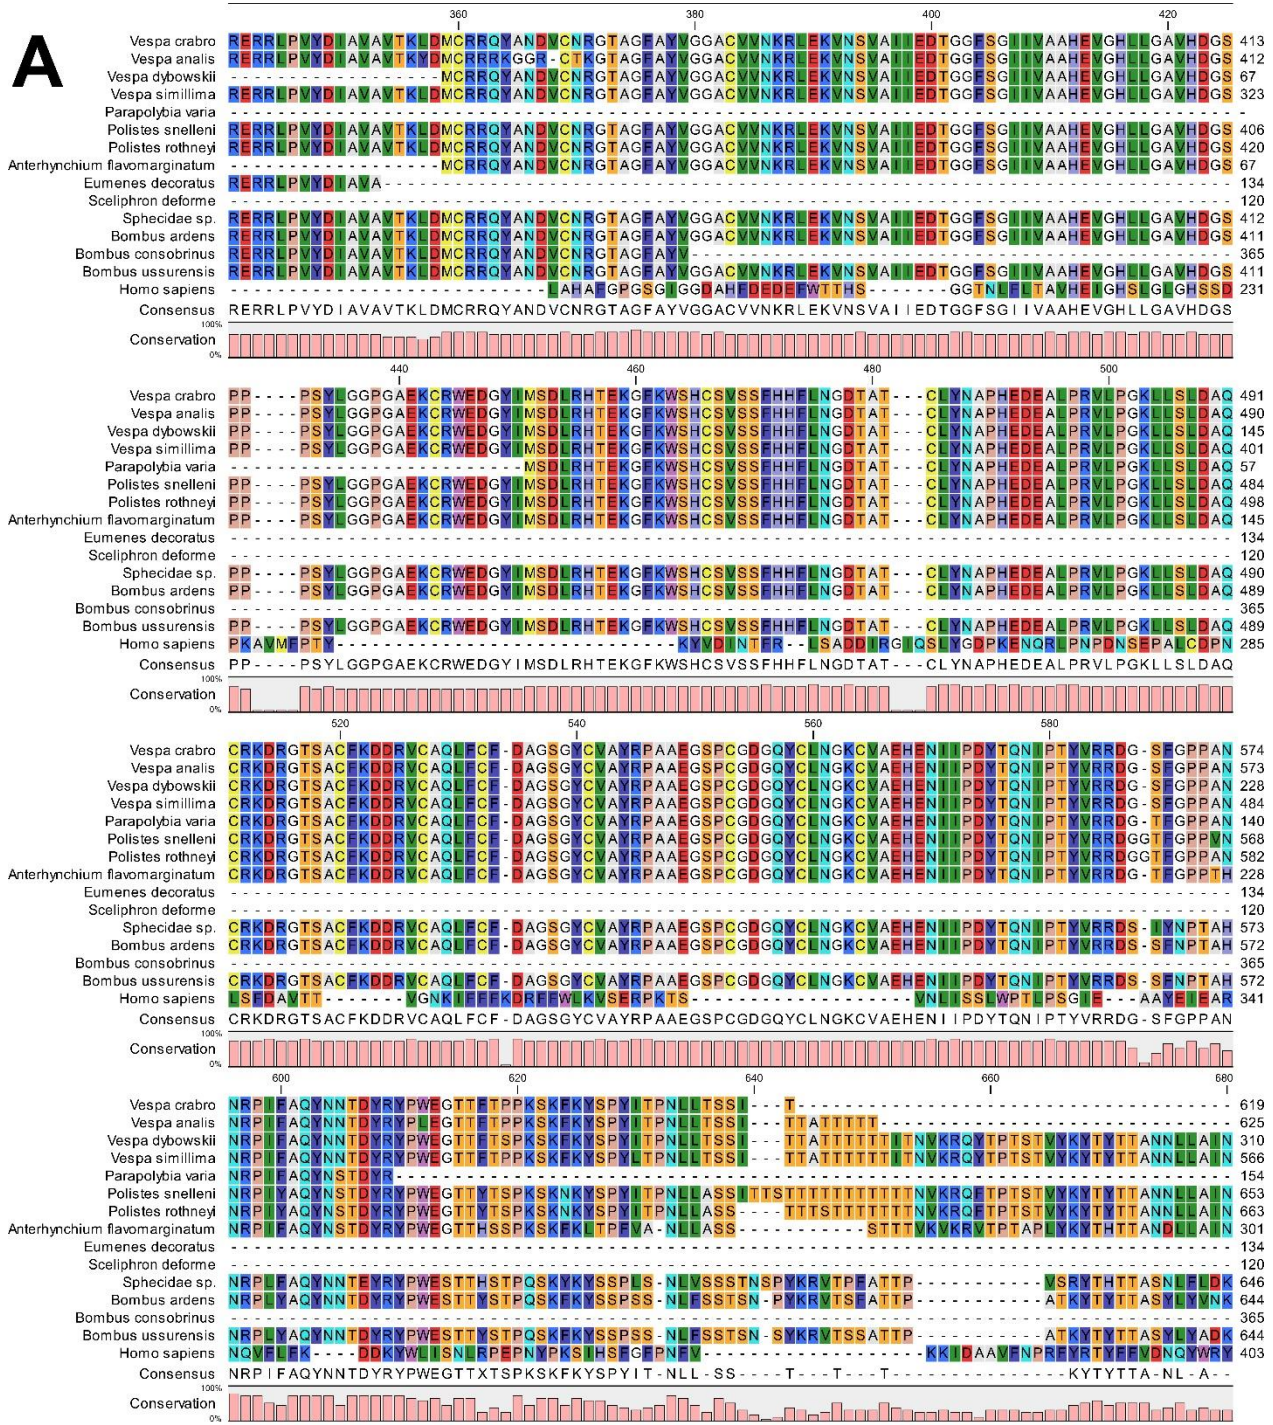

**A**

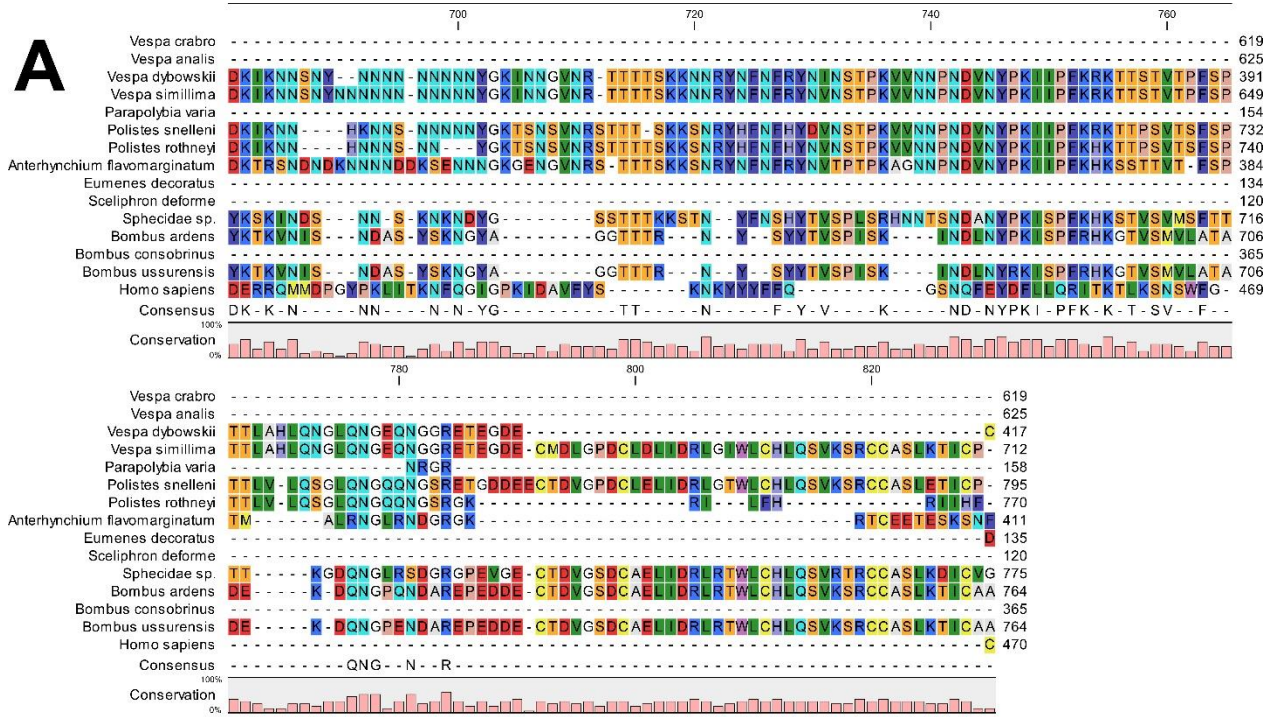

**B**

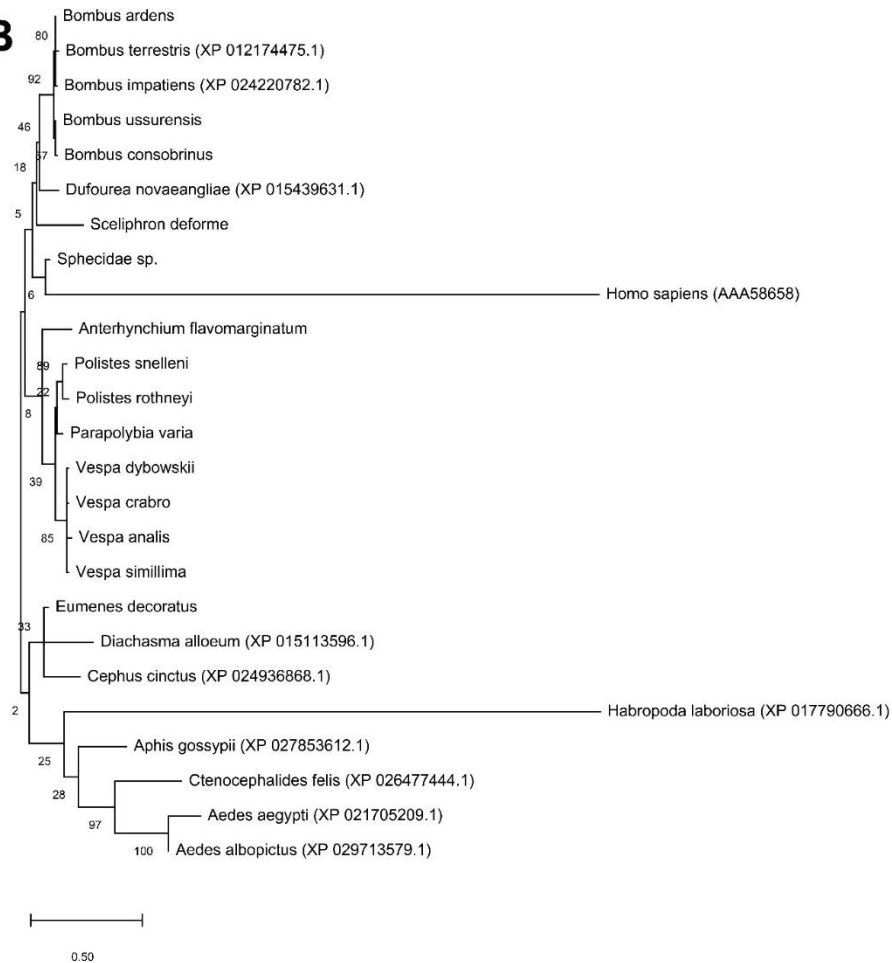

**Figure S20.** Amino acid alignments of metalloproteinase. A) Alignment of amino acid sequences from *V. crabro*, *V. analis*, *V. dybowskii*, *V. simillima*, *P. varia*, *P. snelleni*, *P. rothneyi*, *A. flavomarginatum*, *E. decoratus*, *S. deforme*, *Sphecidae* sp., *B. ardens*, *B. ussurensis* and *H. sapiens*. B) Phylogenetic analysis of metalloproteinase.

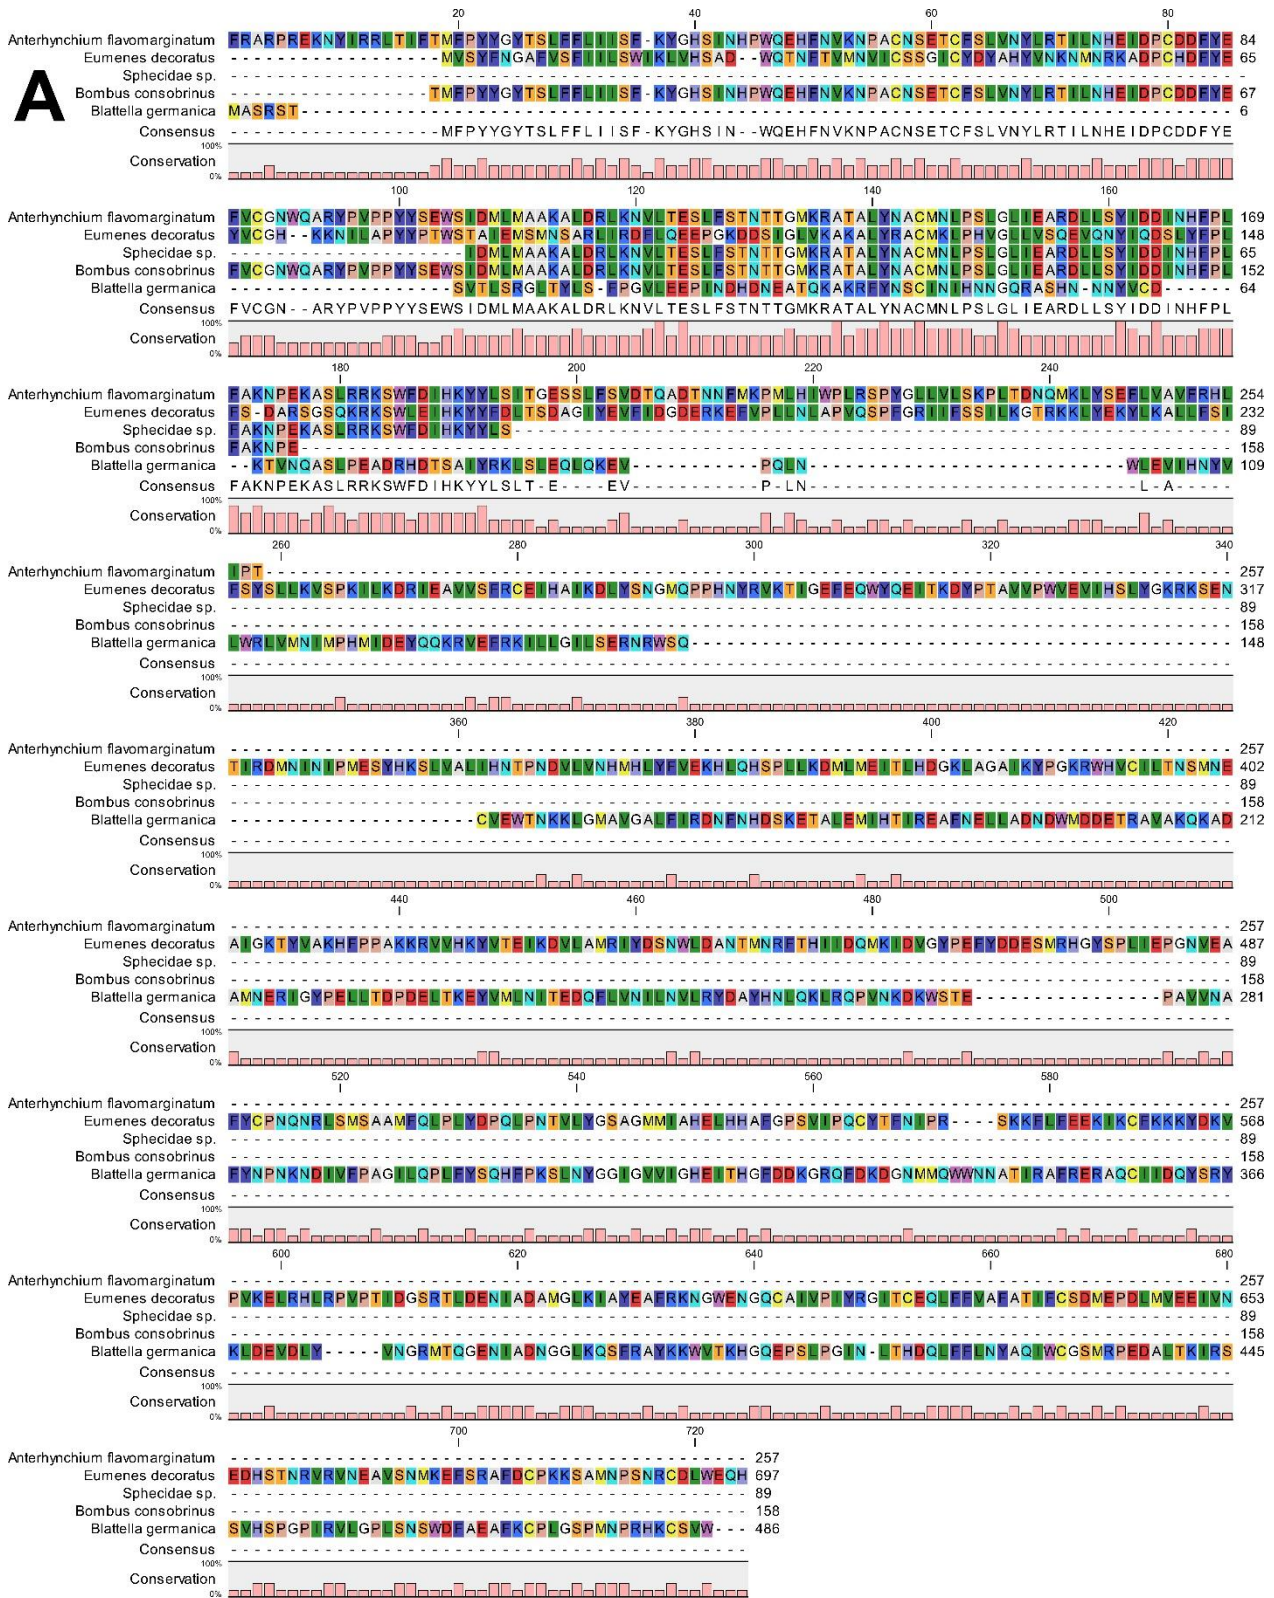

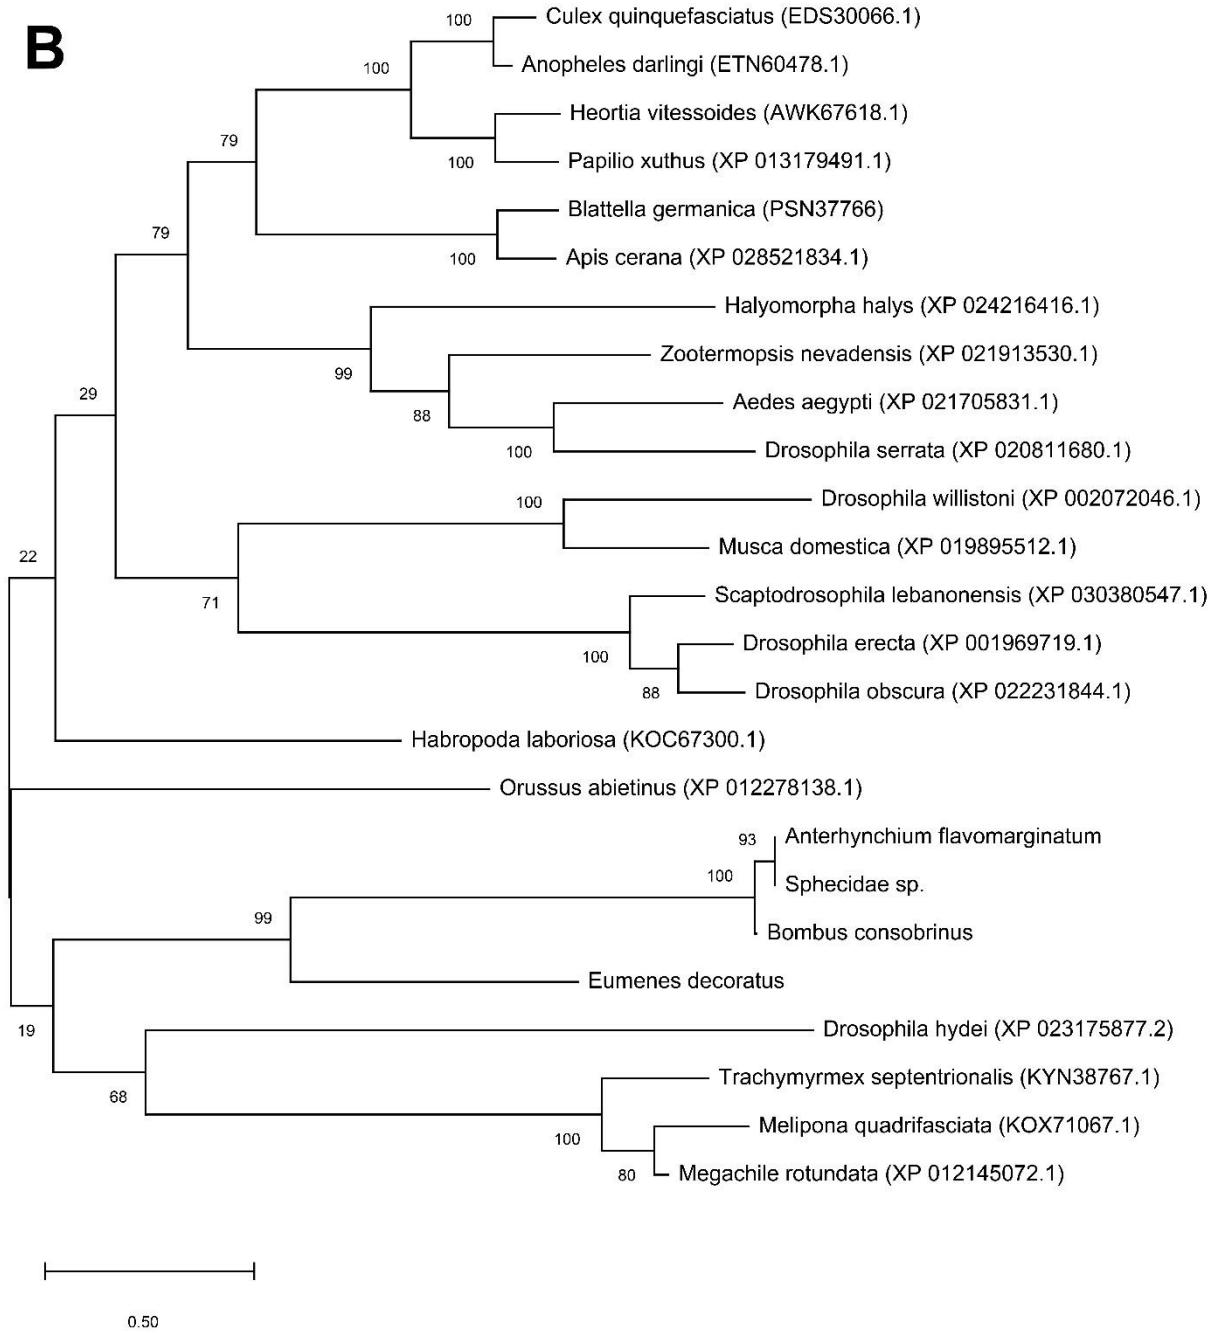

**Figure S21.** Amino acid alignments of neprilysin. A) Alignment of amino acid sequences from *A. flavomarginatum*, *E. decoratus*, *B. consobrinus* and *B. germanica*. B) Phylogenetic analysis of neprilysin.

**A**

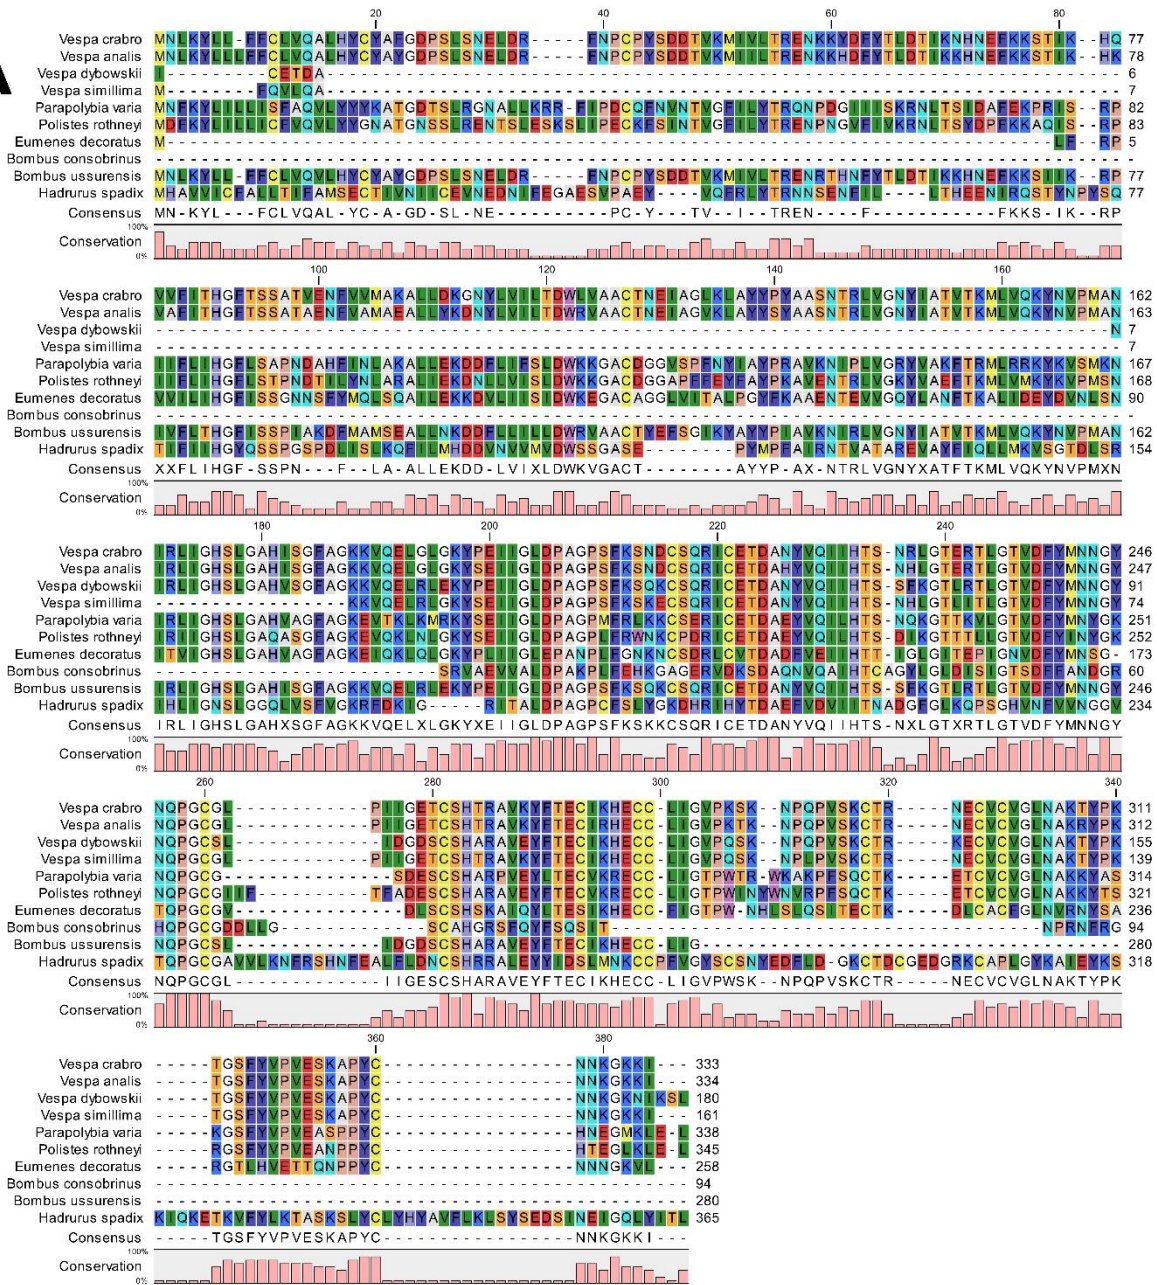

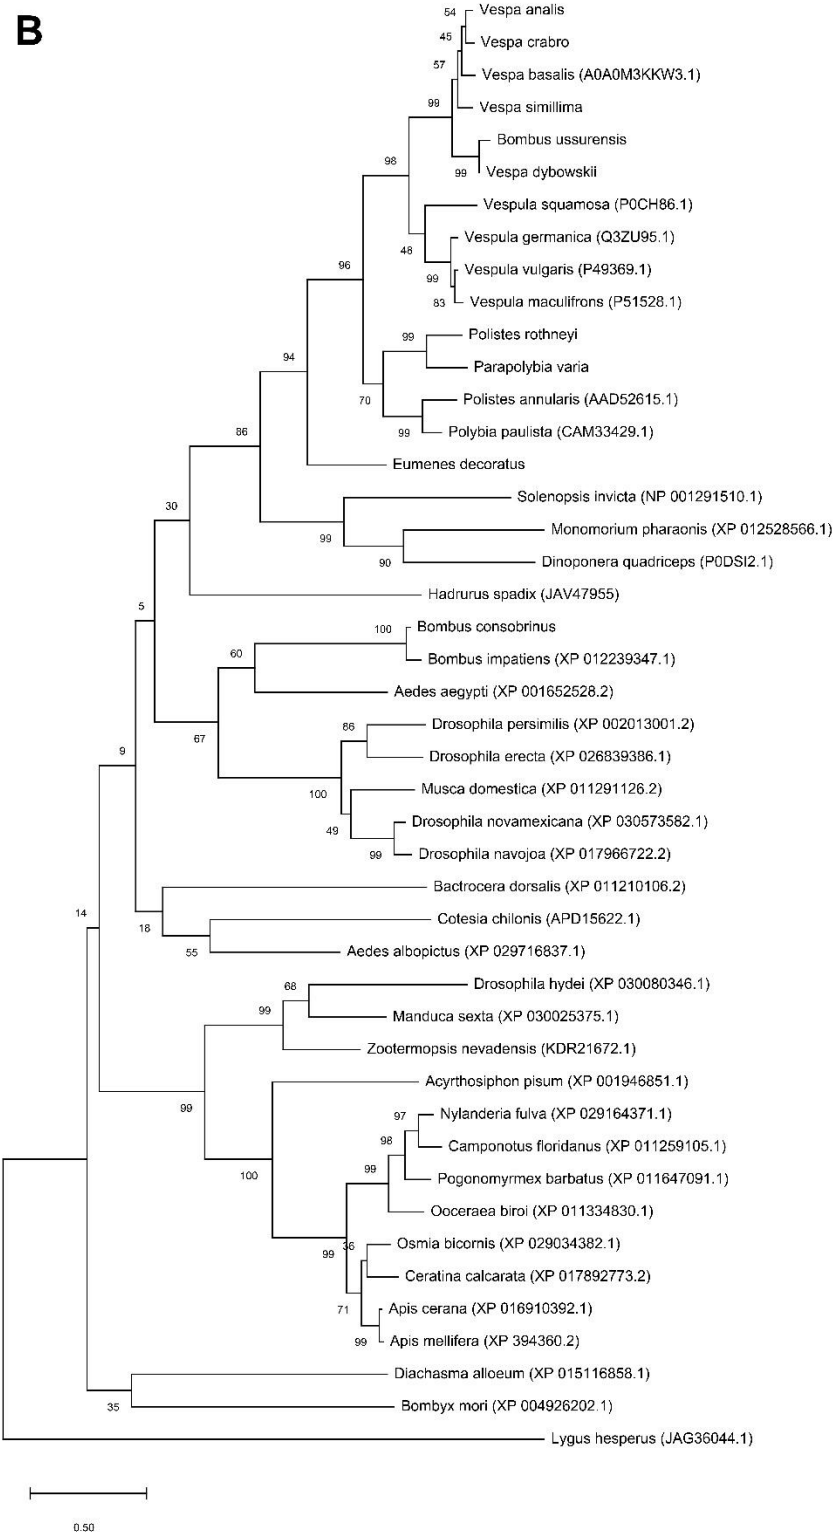

**Figure S22.** Amino acid alignments of phospholipase A1. A) Alignment of amino acid sequences from *V. crabro*, *V. analis*, *V. dybowskii*, *V. simillima*, *P. varia*, *P. rothneyi*, *E. decoratus*, *B. consobrinus*, *B. ussurensis* and *H. spadix*. B) Phylogenetic analysis of phospholipase A1.



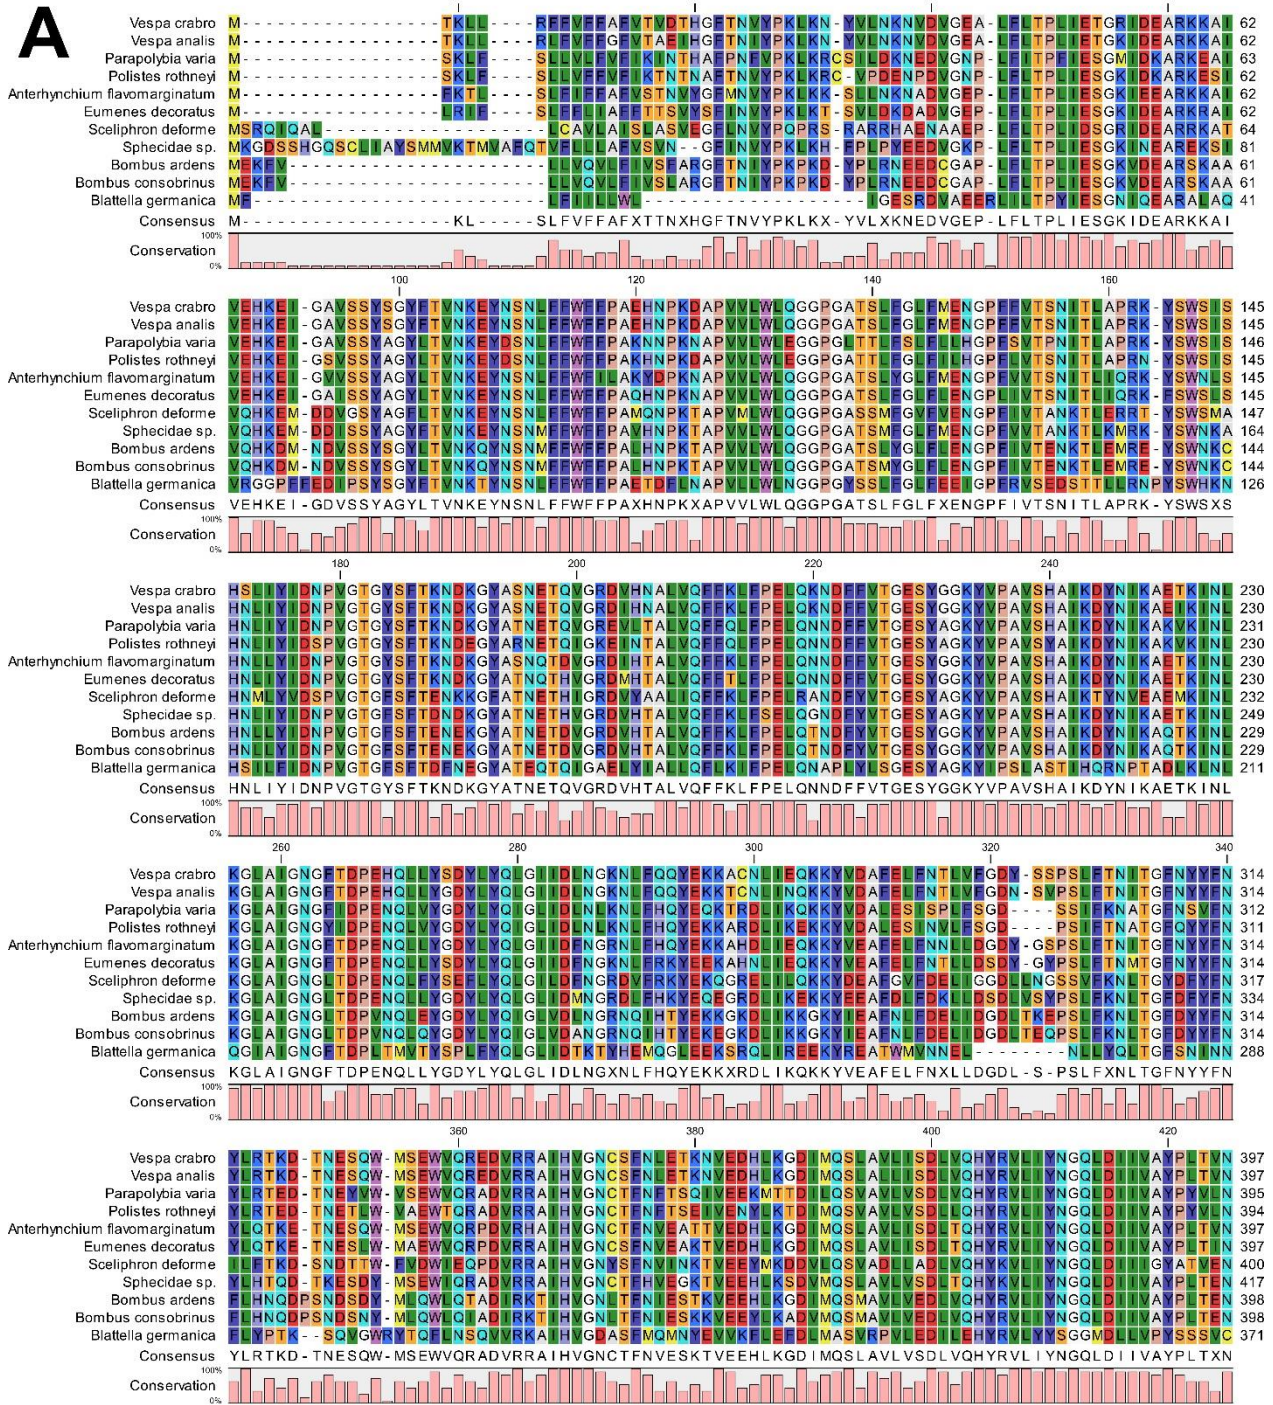

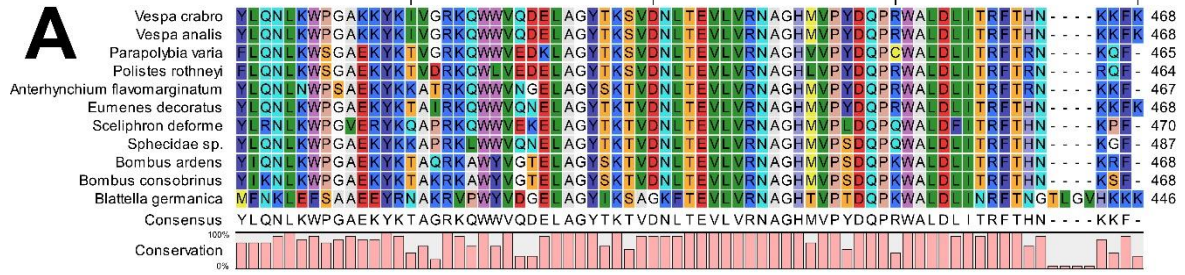

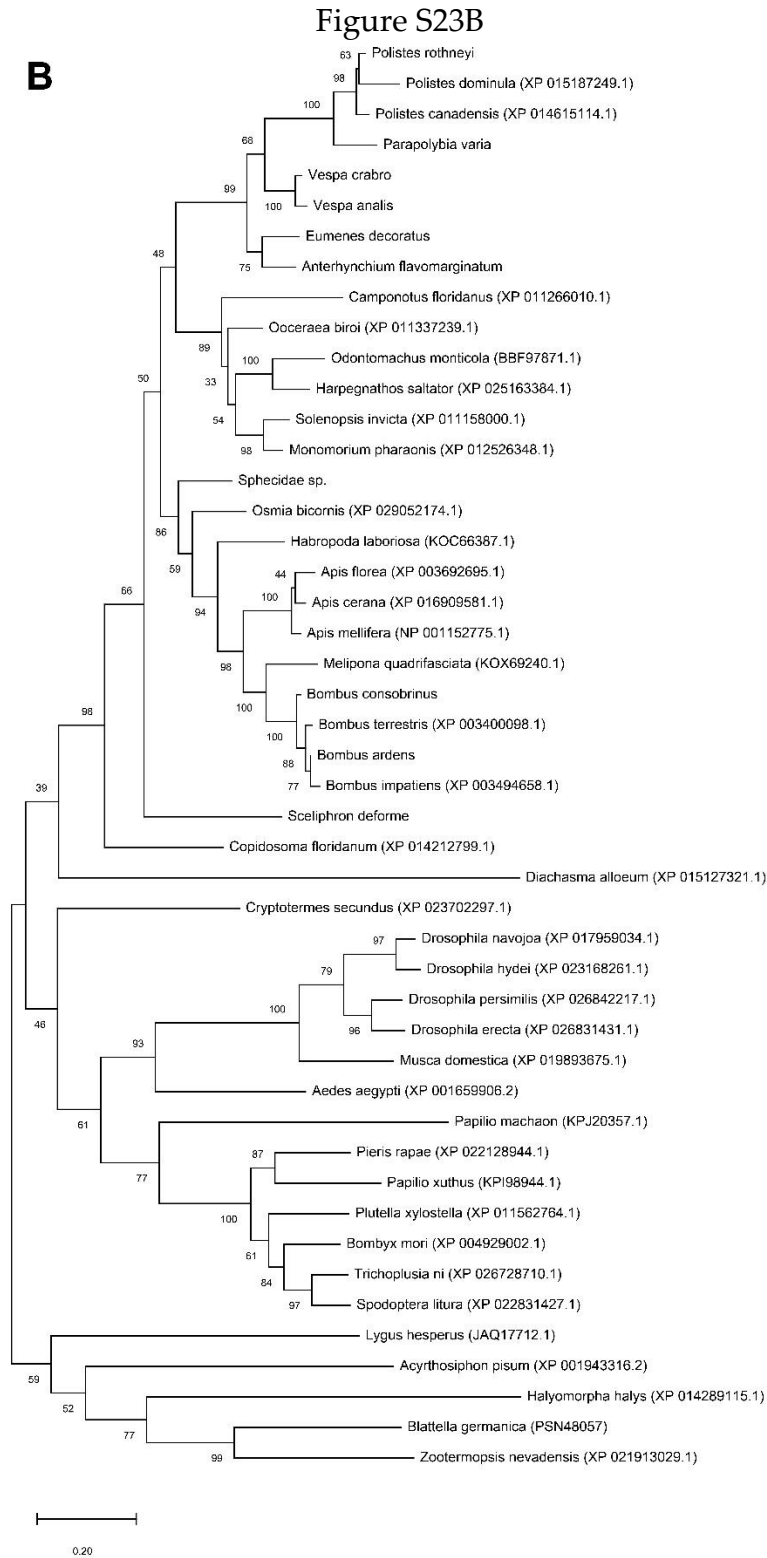

**Figure S23.** Amino acid alignments of serine carboxypeptidase. A) Alignment of amino acid sequences from *V. crabro*, *V. analis*, *P. varia*, *P. rothneyi*, *A. flavomarginatum*, *E. decoratus*, *S. deforme*, *Sphecidae* sp., *B. ardens*, *B. consobrinus* and *B. germanica*. B) Phylogenetic analysis of serine carboxypeptidase.

**A**

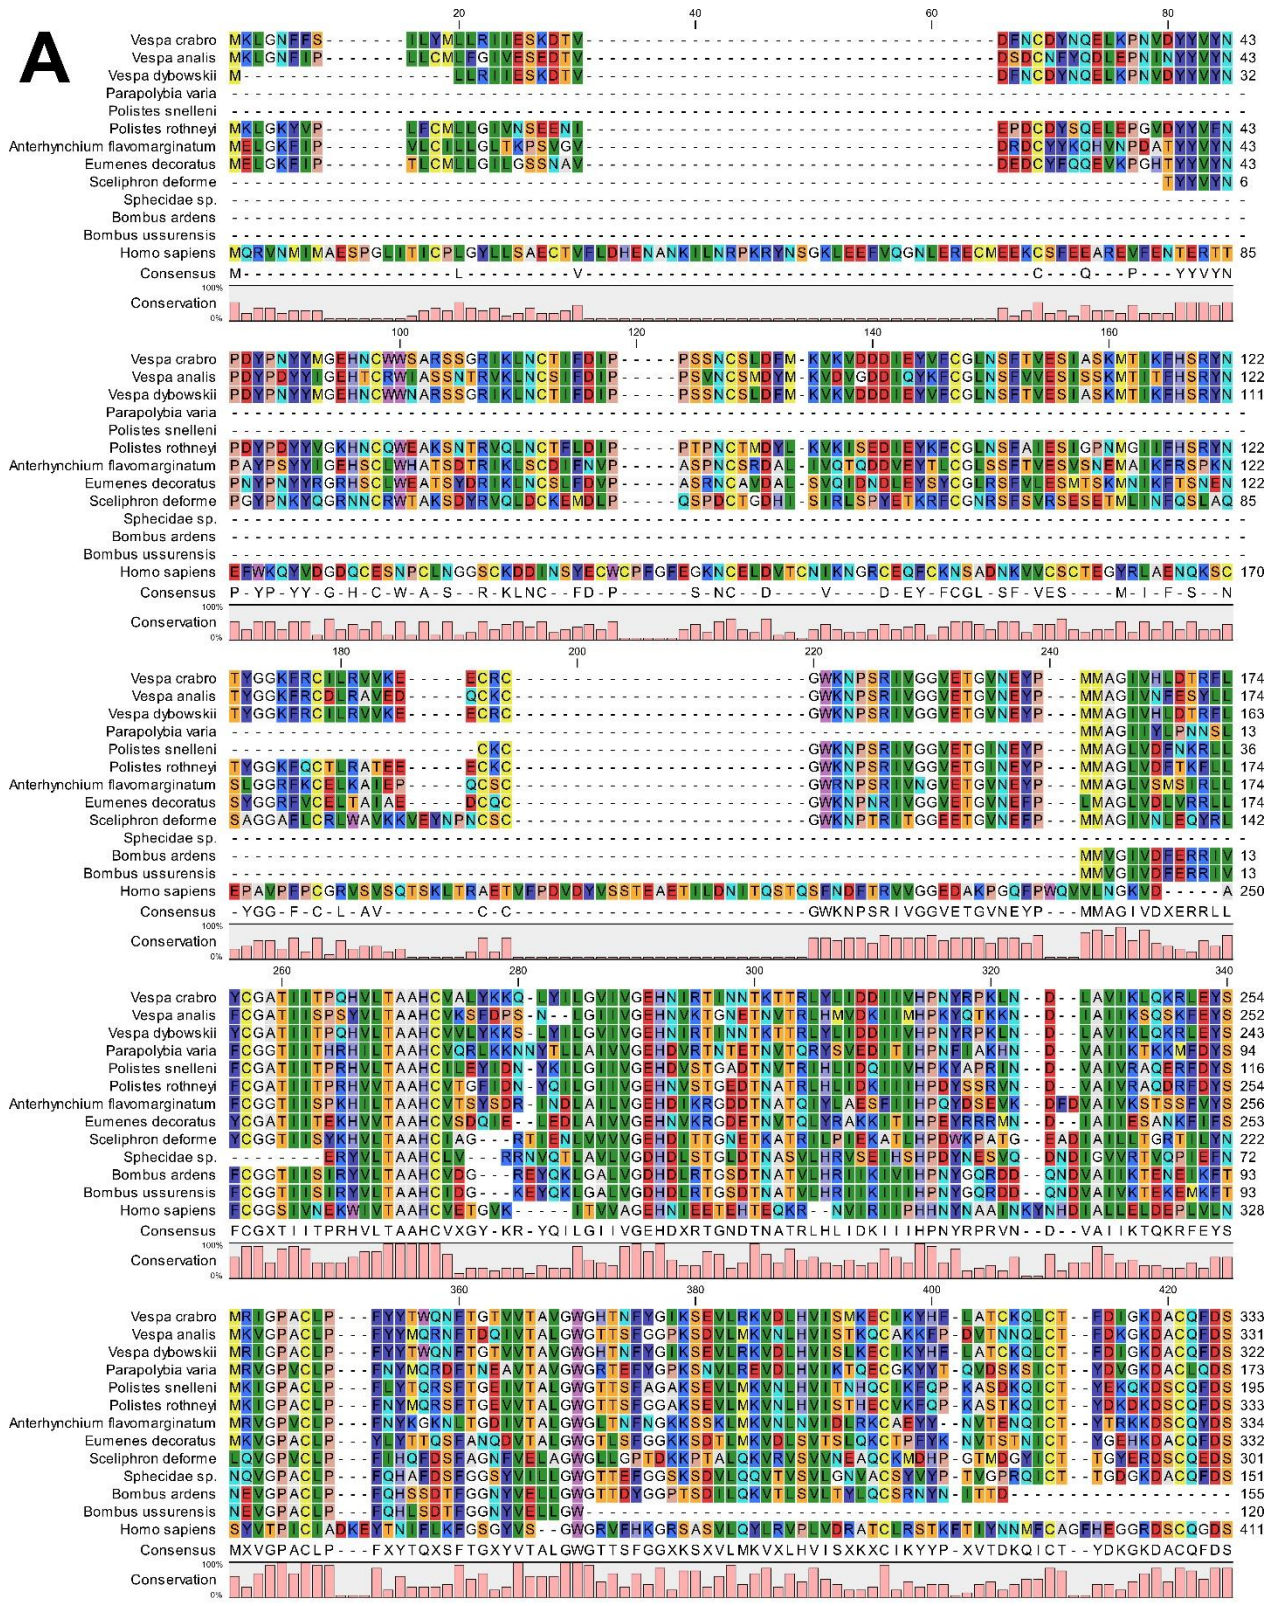

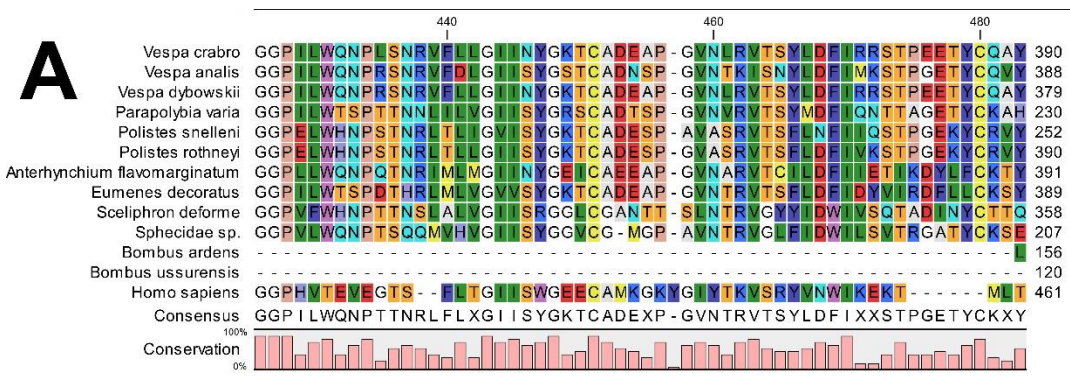

Figure S24B

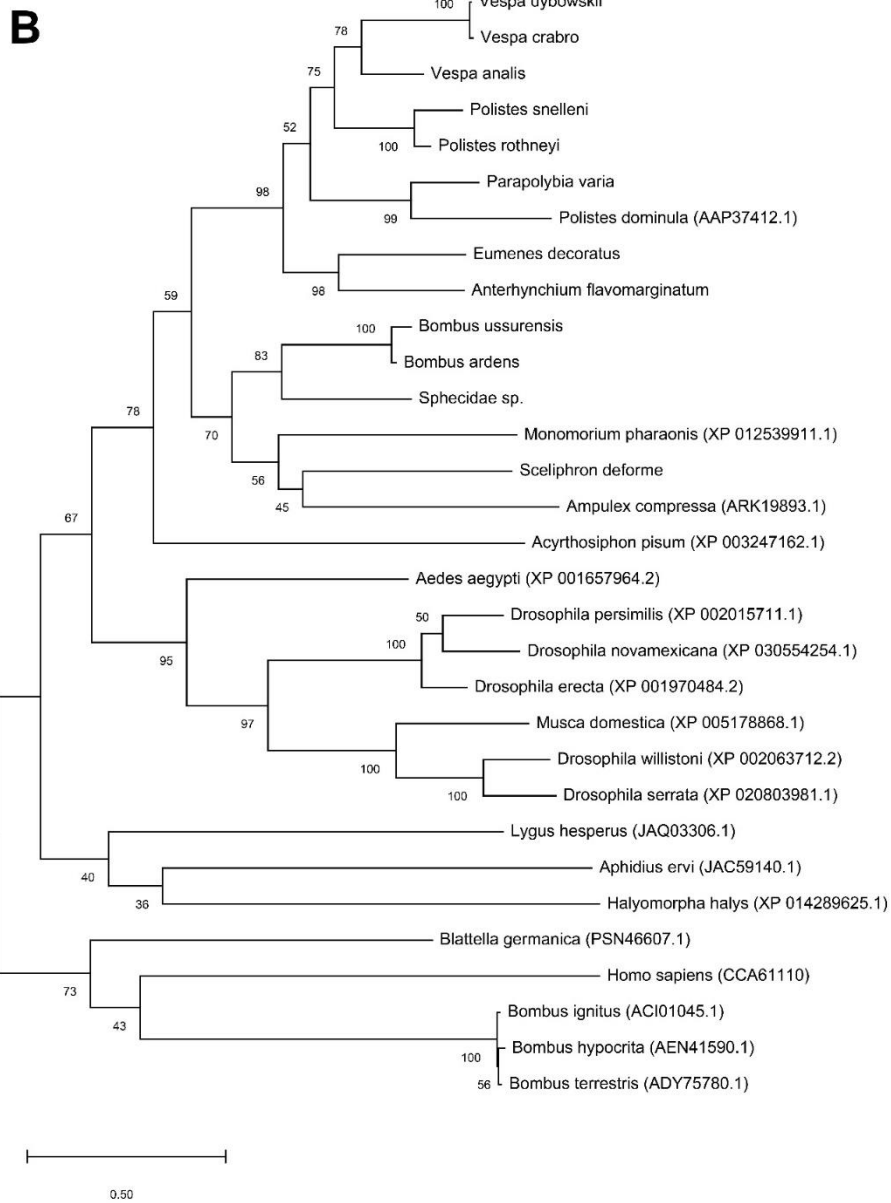

**Figure S24.** Amino acid alignments of serine protease. A) Alignment of amino acid sequences from *V. crabro*, *V. analis*, *V. dybowskii*, *P. varia*, *P. snelleni*, *P. rothneyi*, *A. flavomarginatum*, *E. decorates*, *S. deforme*, *Sphecidae sp.*, *B. ardens*, *B. ussurensis* and *H. sapiens*. B) Phylogenetic analysis of serine protease.

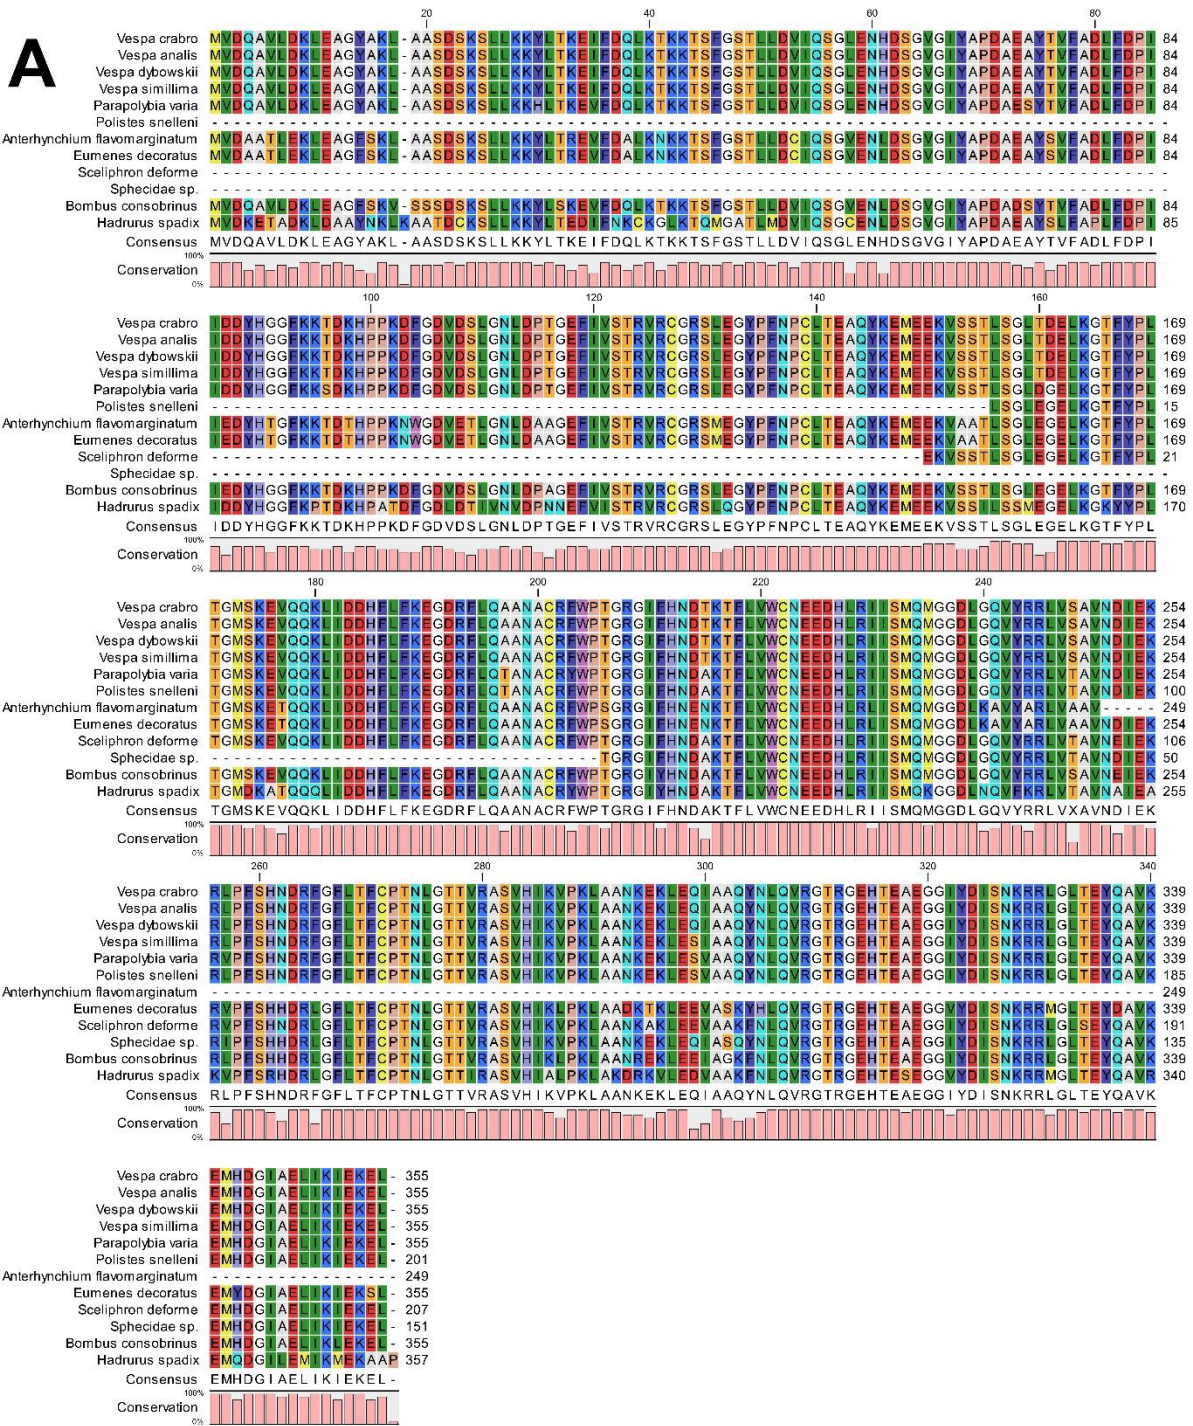

Figure S25B

**B**

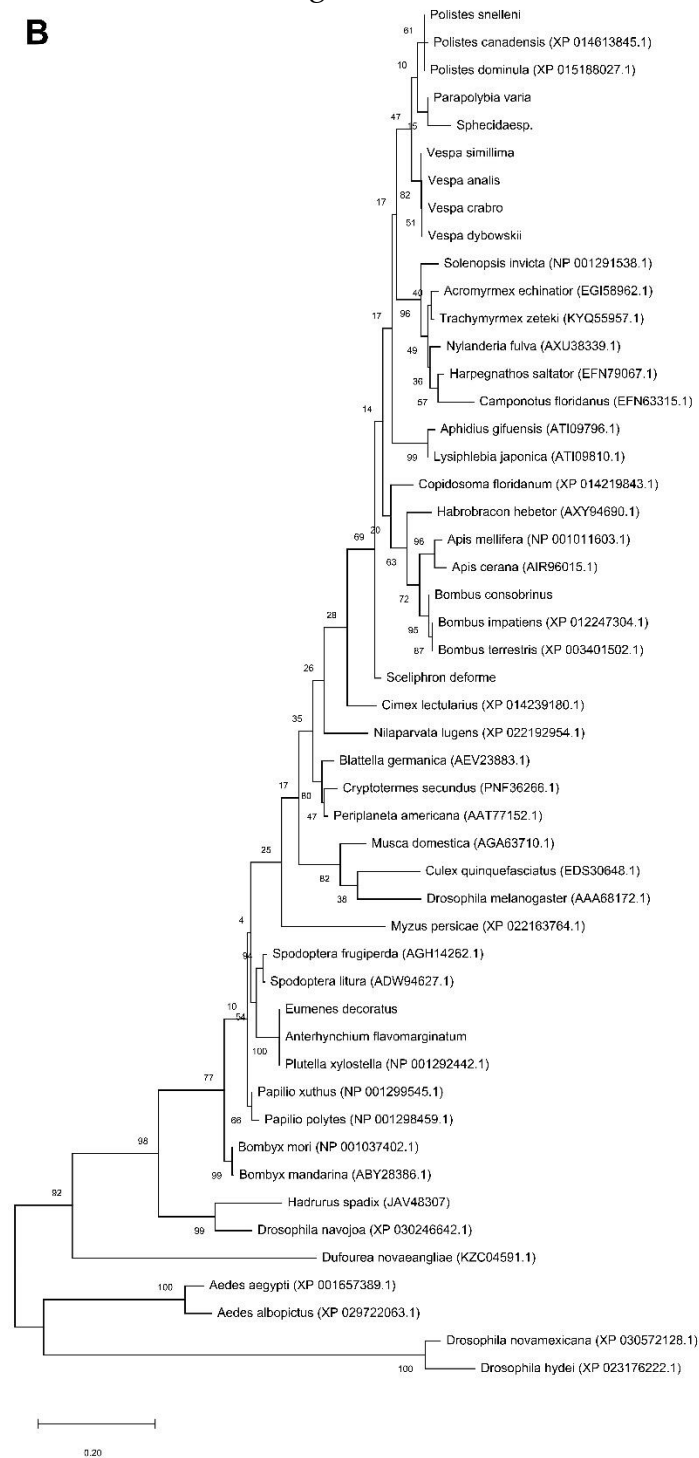

**Figure S25.** Amino acid alignments of arginine kinase. A) Alignment of amino acid sequences from *V. crabro*, *V. analis*, *V. dybowskii*, *V. simillima*, *P. varia*, *P. snelleni*, *A. flavomarginatum*, *E. decoratus*, *S. deforme*, *Sphecoidea* sp., *B. consobrinus* and *Hadrurus spadix*. B) Phylogenetic analysis of arginine kinase.





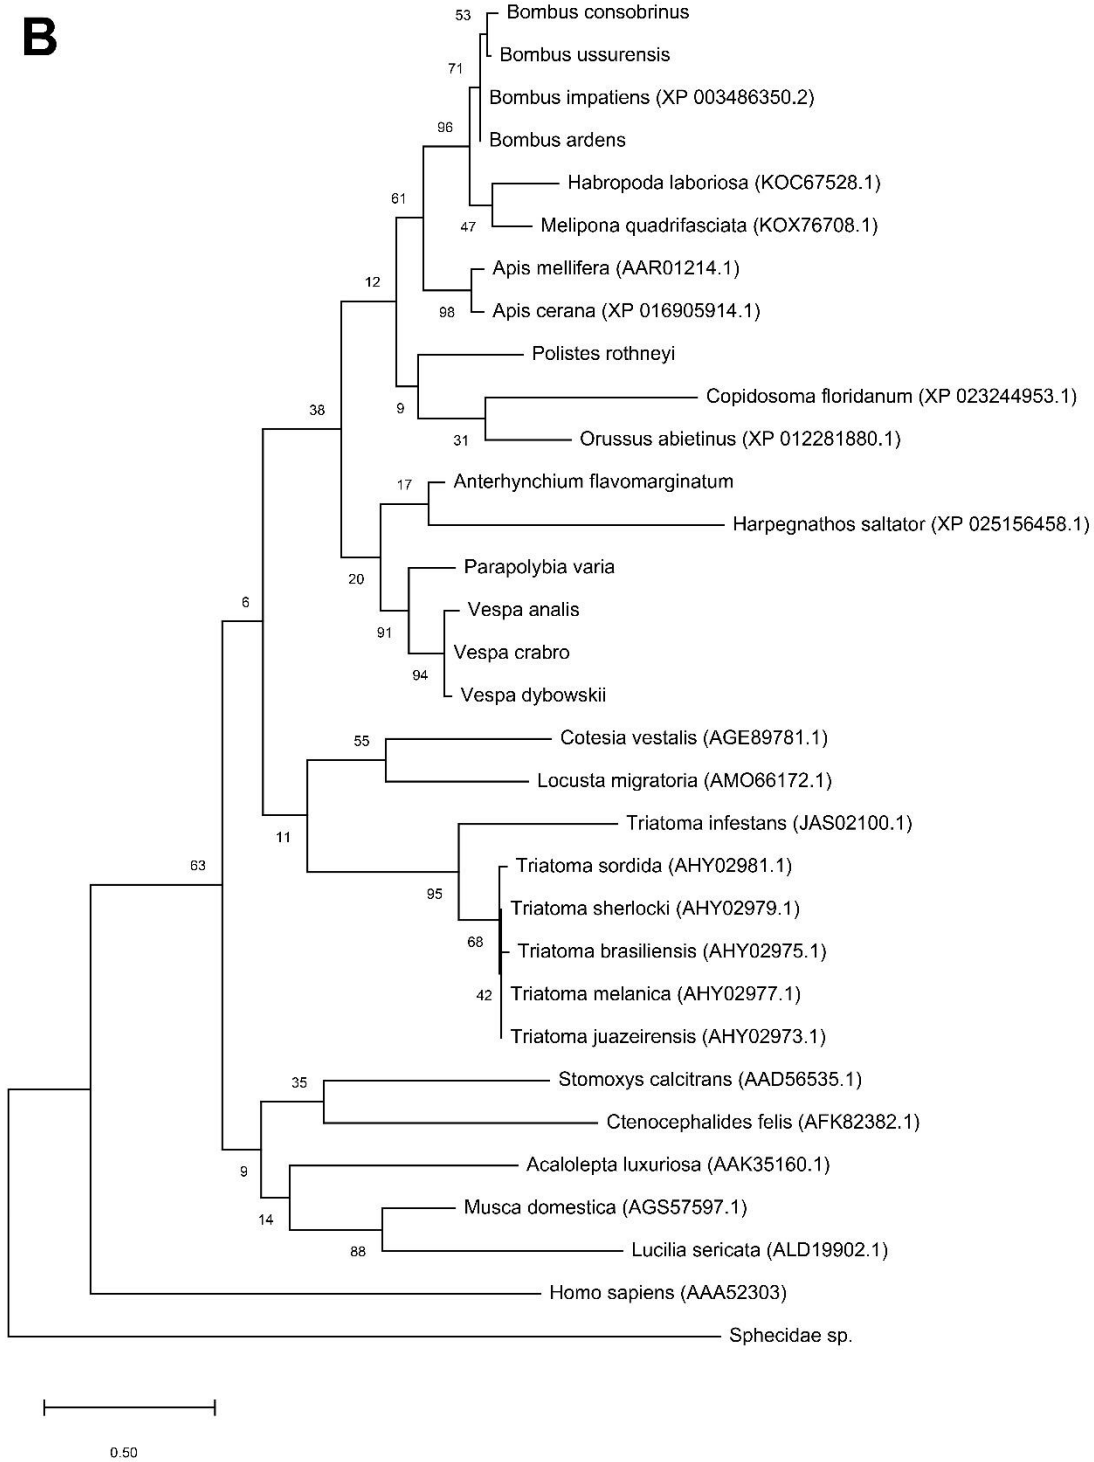

**Figure S26.** Amino acid alignments of defensin 1. A) Alignment of amino acid sequences from *V. crabro*, *V. analis*, *V. dybowskii*, *P. varia*, *P. rothneyi*, *A. flavomarginatum*, *Sphecidae* sp., *B. ardens*, *B. consobrinus*, *B. ussurensis* and *H. sapiens*. B) Phylogenetic analysis of defensin 1.

**A**

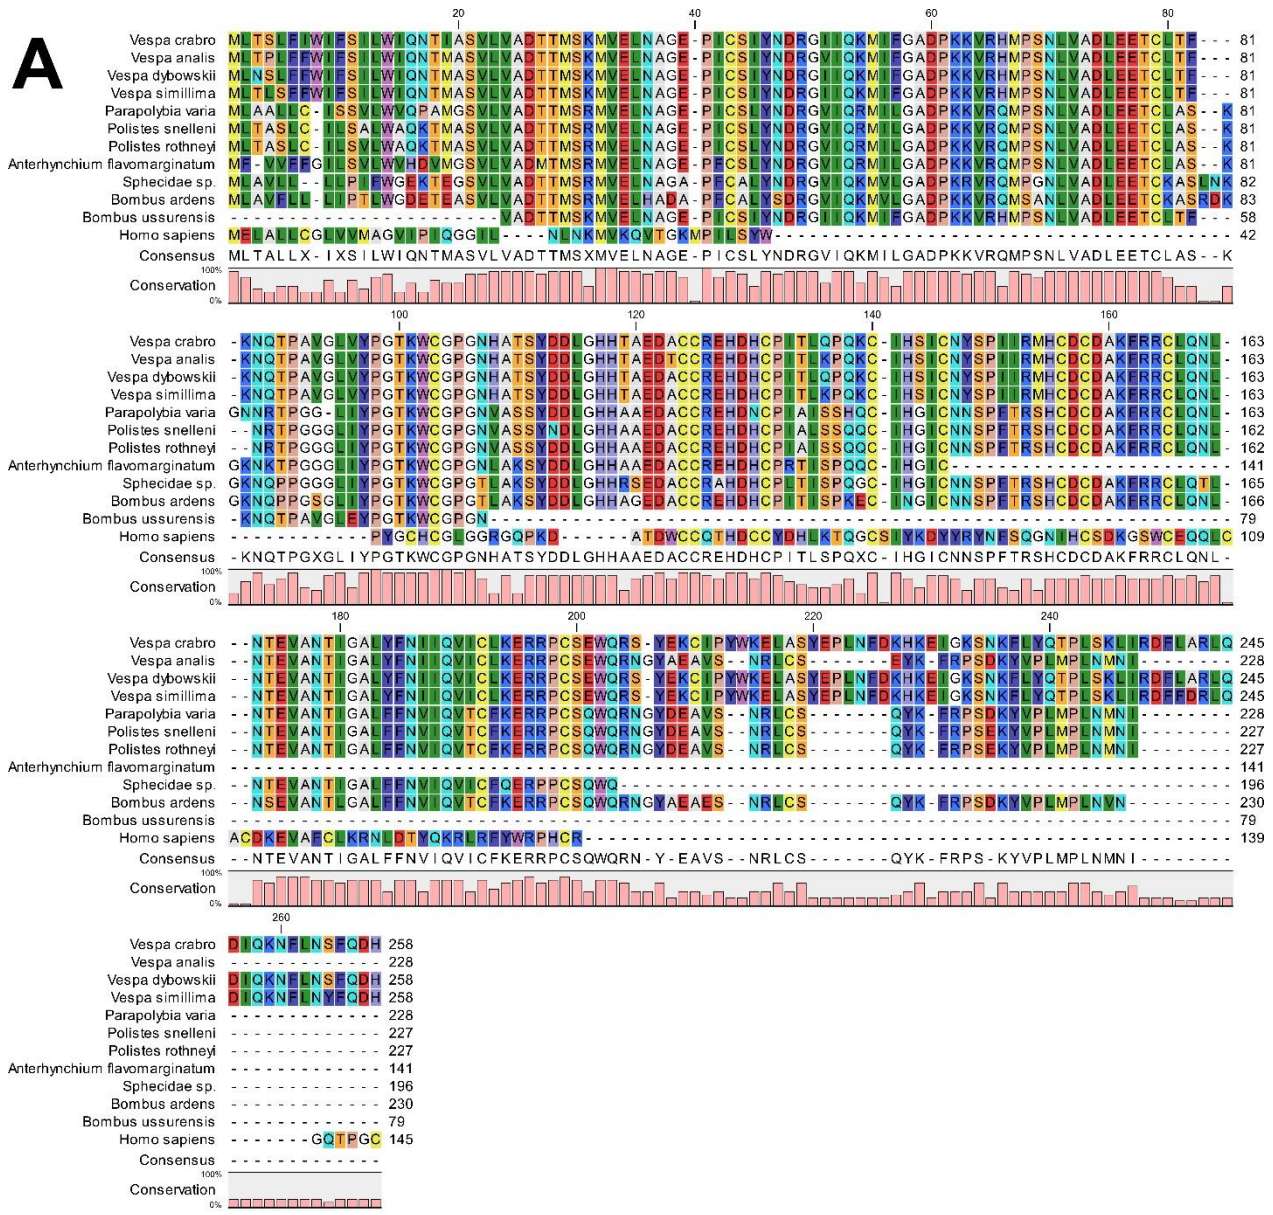

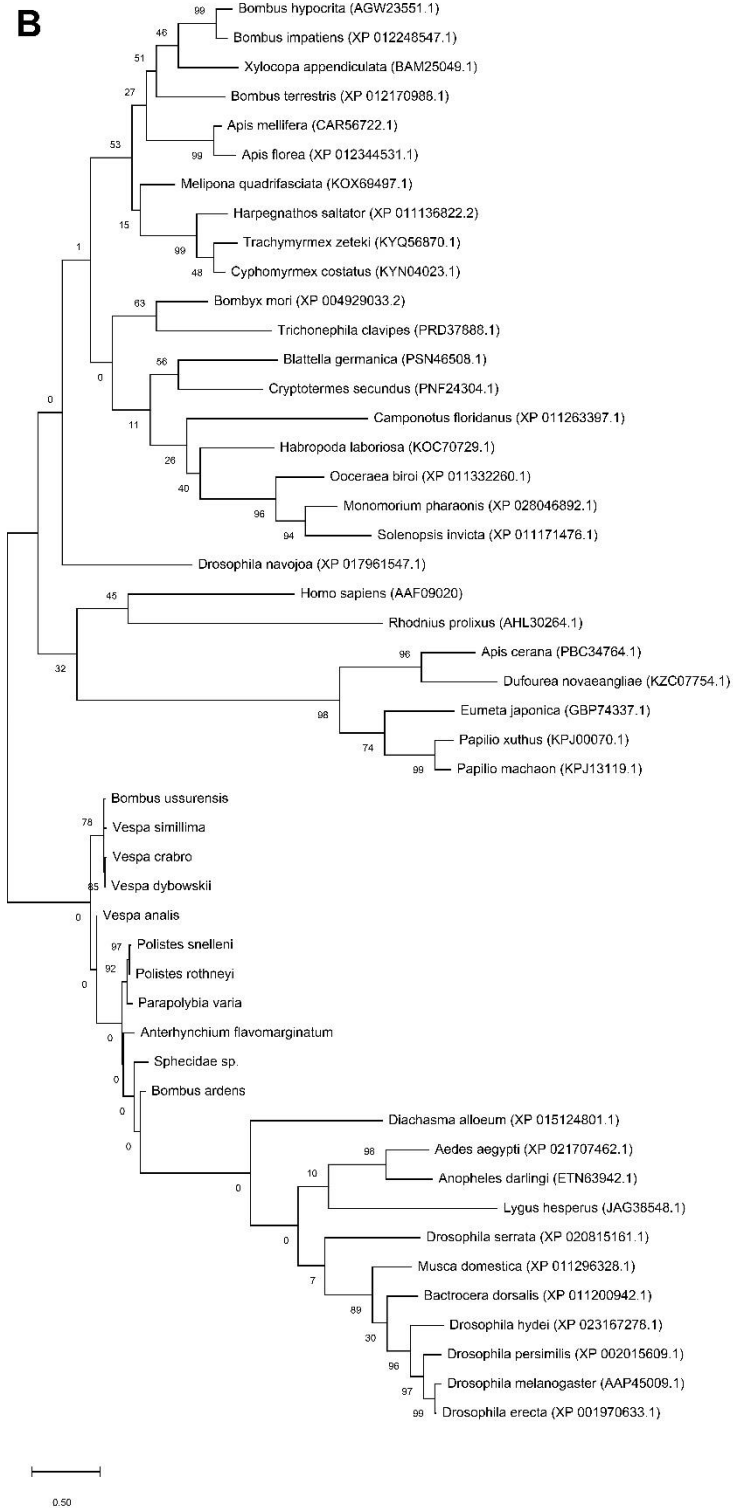

**Figure S27.** Amino acid alignments of phospholipase A2. A) Alignment of amino acid sequences from *V. crabro*, *V. analis*, *V. dybowskii*, *V. similima*, *P. varia*, *P. rothneyi*, *A. flavomarginatum*, *Sphecidae sp.*, *B. ardens*, *B. ussurensis* and *H. sapiens*. B) Phylogenetic analysis of phospholipase A2.

**A**

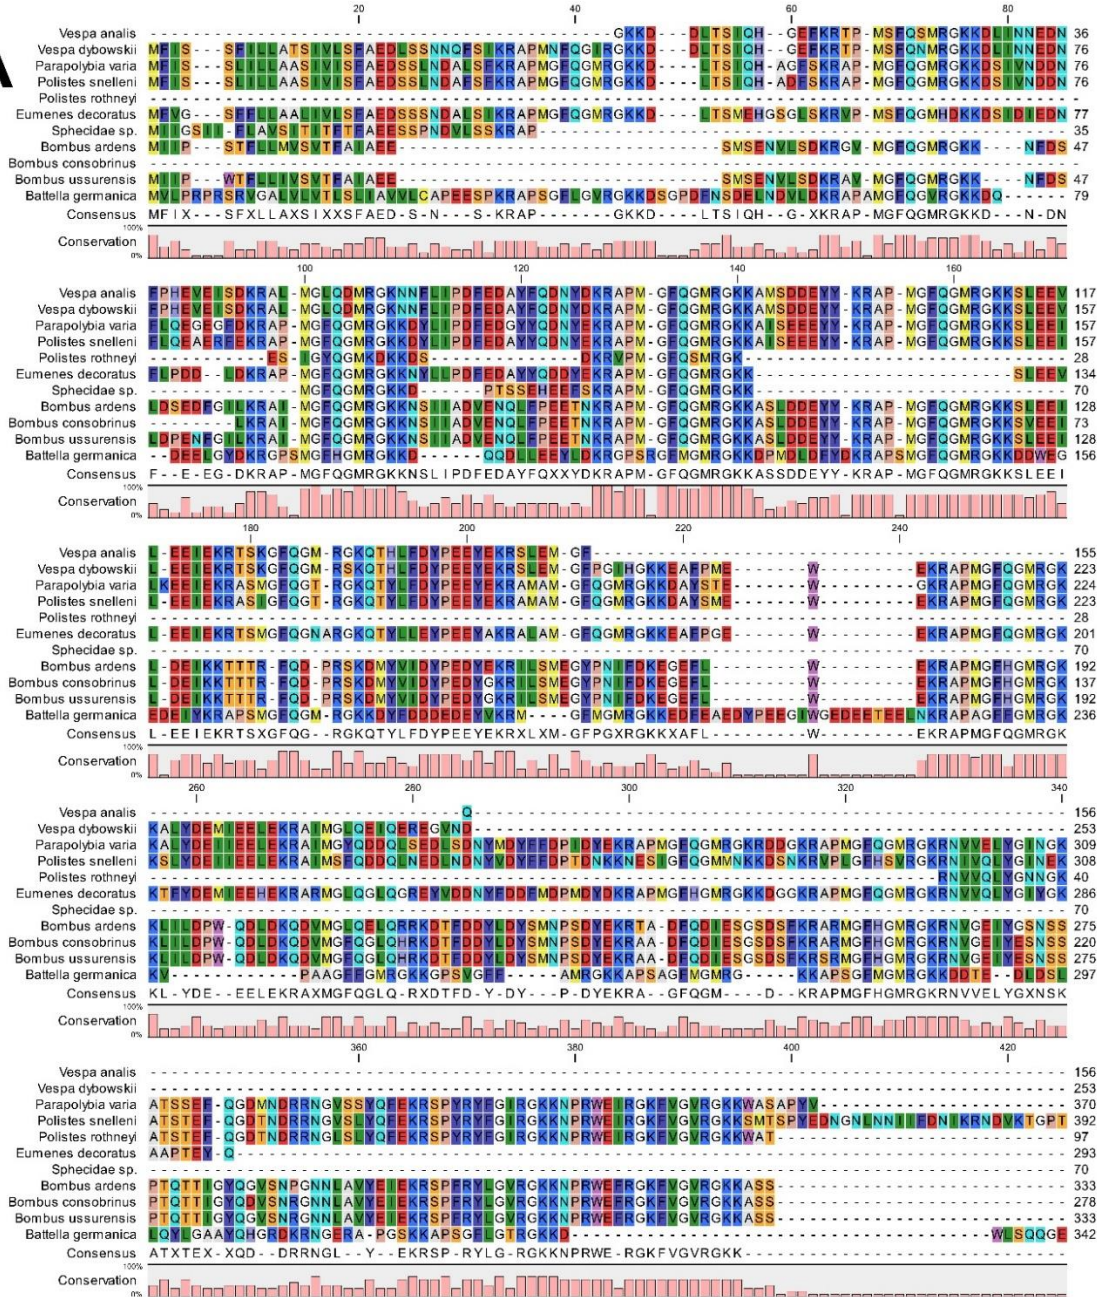

**A**

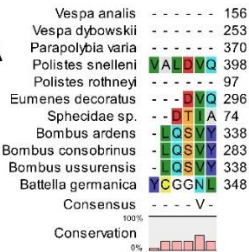

Figure S28B

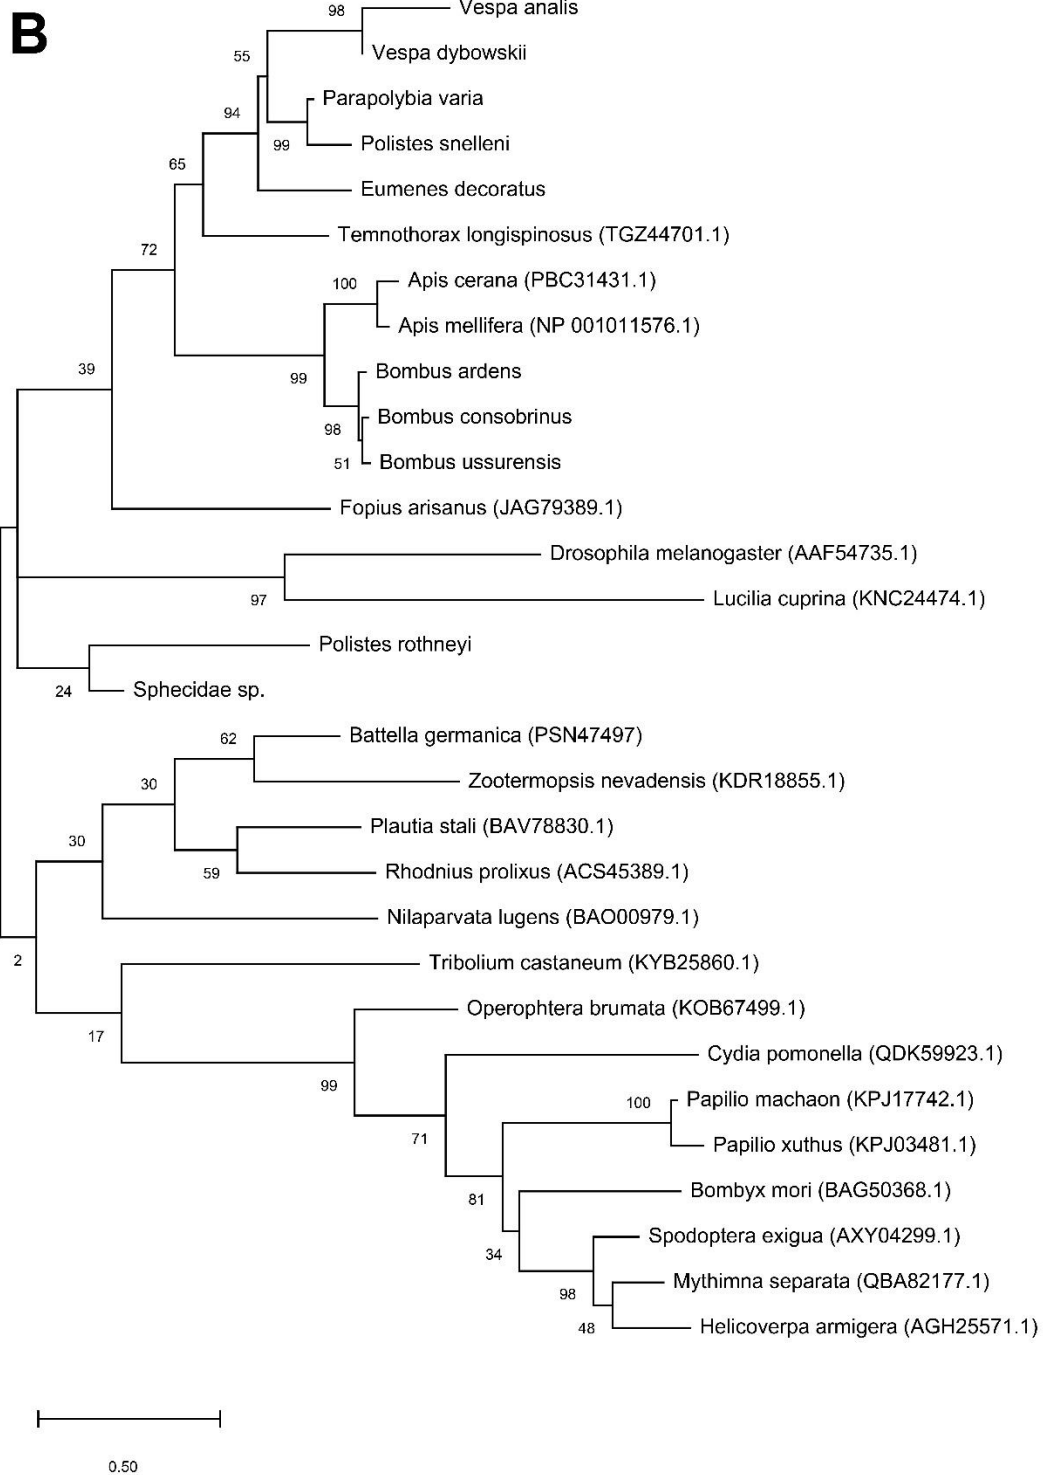

**Figure S28.** Amino acid alignments of tachykinin. A) Alignment of amino acid sequences from *V. analis*, *V. dybowskii*, *P. varia*, *P. snelleni*, *P. rothneyi*, *E. decorates*, *Sphecidae* sp., *B. ardens*, *B. consobrinus*, *B. ussurensis*, and *B. germanica*. B) Phylogenetic analysis of tachykinin.

**A**

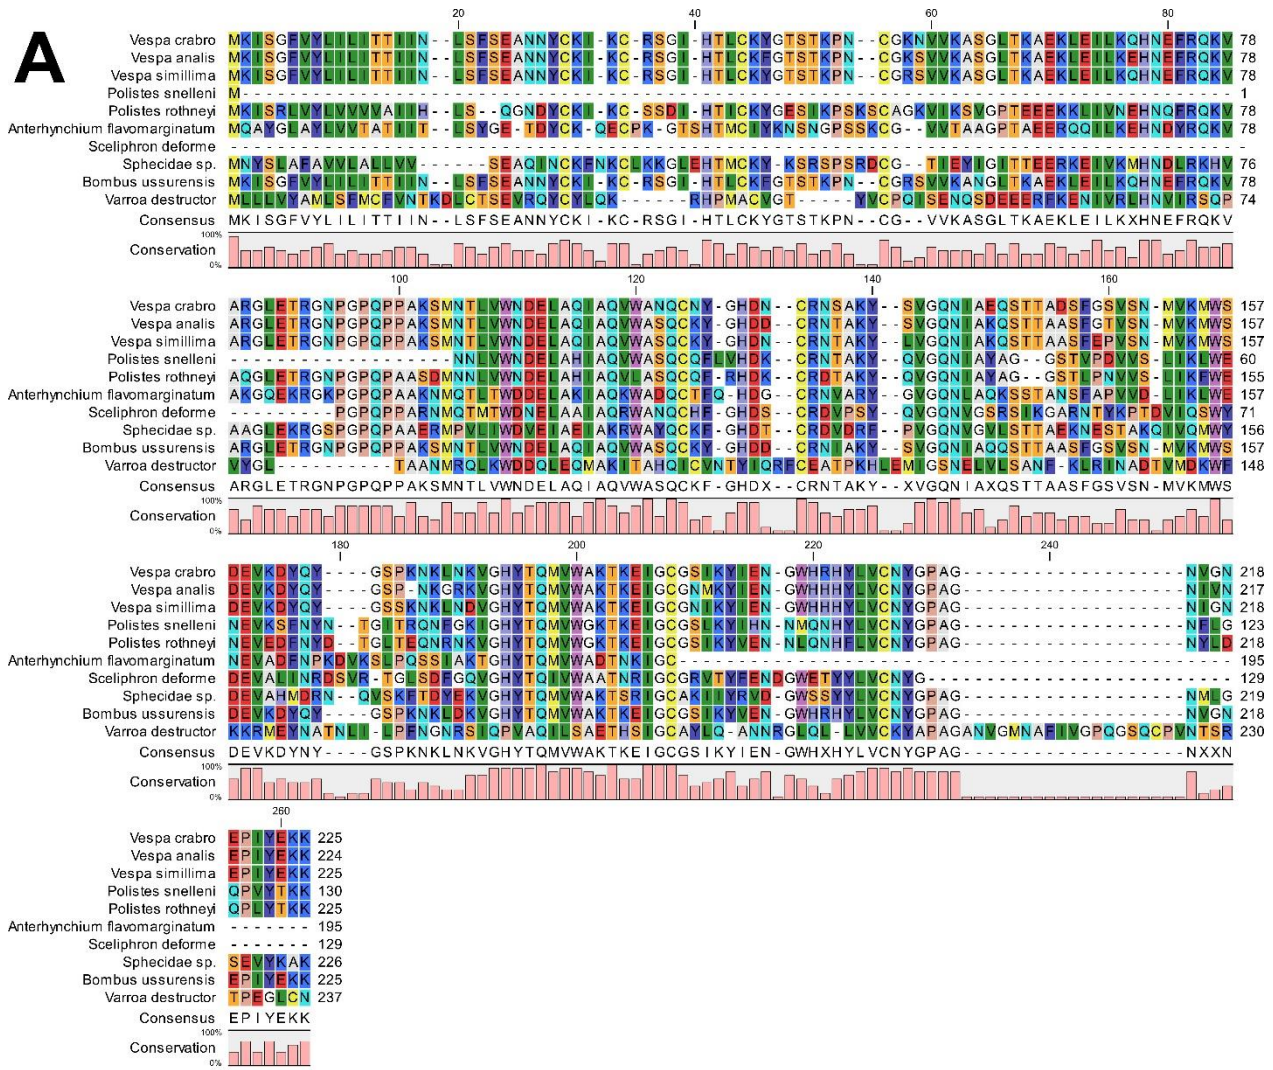

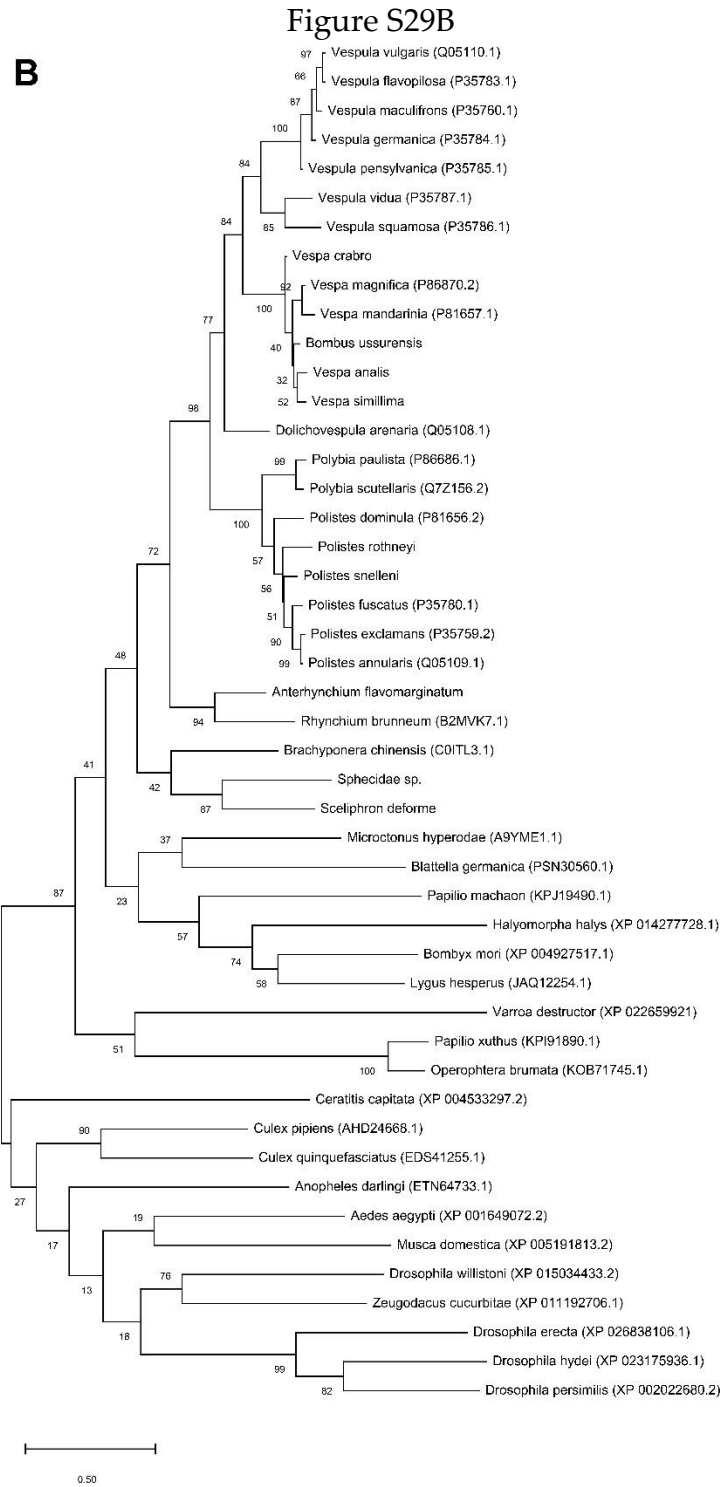

**Figure S29.** Amino acid alignments of venom allergen 5. A) Alignment of amino acid sequences from *V. crabro*, *V. analis*, *V. simillima*, *P. snelleni*, *P. rothneyi*, *A. flavomarginatum*, *S. deforme*, *Sphecidae* sp., *B. ussurensis* and *Varroa destructor*. B) Phylogenetic analysis of venom allergen 5.

**Table S1.** Annotation of top 100 highly expressed genes in the venom gland of *Vespa analis*.

| Putative venom protein/peptide                                  | Length (aa) | E-value     | TPM     |
|-----------------------------------------------------------------|-------------|-------------|---------|
| NA                                                              | 110         |             | 87454.8 |
| NA                                                              | 908         |             | 78311   |
| NA                                                              | 1950        |             | 42608.8 |
| apidaecins type 22-like isoform X1                              | 112         | 3.18167E-14 | 27389.3 |
| cytochrome P450 4g15                                            | 559         | 0           | 23351.3 |
| pheromone-binding protein Gp-9-like                             | 152         | 6.42952E-09 | 18405.8 |
| PREDICTED: uncharacterized protein LOC107072057                 | 103         | 1.26354E-51 | 17769   |
| protein lethal(2)essential for life-like                        | 213         | 4.24012E-73 | 9972.79 |
| fatty acid synthase                                             | 141         | 7.73699E-33 | 6366.62 |
| ejaculatory bulb-specific protein 3-like                        | 129         | 1.11696E-76 | 6284.32 |
| endocuticle structural glycoprotein SgAbd-1-like                | 163         | 1.2089E-100 | 6209.02 |
| fatty acid synthase-like                                        | 149         | 1.00418E-59 | 5957.04 |
| protein lethal(2)essential for life-like                        | 203         | 3.8496E-106 | 5808.01 |
| fatty acid synthase                                             | 881         | 0           | 5141.38 |
| circadian clock-controlled protein-like                         | 248         | 4.4746E-141 | 5059.77 |
| fatty acid synthase-like                                        | 130         | 1.48013E-30 | 4589.06 |
| fatty acid synthase-like                                        | 546         | 0           | 4232.51 |
| uncharacterized protein LOC107263032                            | 103         | 3.72714E-08 | 4173.15 |
| fatty acid synthase-like                                        | 1173        | 0           | 3780.27 |
| NADH dehydrogenase subunit 1 (mitochondrion)                    | 112         | 2.03753E-62 | 3609.25 |
| polyubiquitin isoform X1                                        | 609         | 0           | 3539.51 |
| superoxide dismutase [Cu-Zn]                                    | 155         | 2.04388E-98 | 3458.89 |
| PREDICTED: uncharacterized protein LOC106787992                 | 301         | 0           | 3060.77 |
| coiled-coil-helix-coiled-coil-helix domain-containing protein 2 | 154         | 1.29397E-68 | 2958.1  |
| heat shock 70 kDa protein cognate 4                             | 648         | 0           | 2852.19 |
| PREDICTED: uncharacterized protein LOC106785155                 | 262         | 1.5009E-126 | 2684.34 |
| thioredoxin-2                                                   | 105         | 1.92448E-63 | 2664.05 |
| PREDICTED: uncharacterized protein LOC108579915                 | 340         | 1.72695E-93 | 2640.18 |
| ferritin subunit                                                | 216         | 4.53228E-95 | 2625.15 |
| fatty acid synthase                                             | 105         | 9.42896E-26 | 2621.26 |
| chitinase-like protein Idgf4                                    | 434         | 0           | 2608.84 |
| 40S ribosomal protein S3a                                       | 267         | 0           | 2466.92 |
| general odorant-binding protein 56d-like                        | 168         | 8.88272E-75 | 2430.01 |
| PREDICTED: uncharacterized protein LOC106793109                 | 222         | 6.4981E-136 | 2401.66 |
| ubiquitin-60S ribosomal protein L40-like isoform X1             | 128         | 5.68352E-91 | 2384.4  |
| peptidoglycan-recognition protein 2-like                        | 186         | 2.3595E-99  | 2353.4  |
| fatty acid synthase                                             | 157         | 1.66649E-69 | 2237.27 |
| ATP synthase lipid-binding protein, mitochondrial               | 137         | 7.9294E-77  | 2185.08 |
| vitellogenin-like                                               | 1759        | 0           | 2138.9  |
| ferritin light chain, oocyte isoform                            | 219         | 3.06322E-84 | 2015.01 |
| tubulin alpha-1 chain-like                                      | 450         | 0           | 1937.32 |
| 40S ribosomal protein S25                                       | 119         | 1.4342E-80  | 1861.56 |
| PREDICTED: uncharacterized protein LOC105667370                 | 132         | 7.83238E-72 | 1850.5  |
| heat shock protein 70 A2-like                                   | 637         | 0           | 1832.15 |
| PREDICTED: uncharacterized protein LOC106793189                 | 221         | 1.99622E-89 | 1775.94 |
| probable Bax inhibitor 1                                        | 236         | 4.1883E-139 | 1720.58 |
| peptidoglycan-recognition protein SC2-like                      | 198         | 4.5899E-100 | 1712.61 |
| 60S ribosomal protein L18                                       | 188         | 7.4137E-129 | 1704.56 |
| 40S ribosomal protein S17                                       | 130         | 3.29733E-92 | 1700.91 |
| putative fatty acyl-CoA reductase CG5065                        | 540         | 0           | 1658.5  |
| cathepsin L                                                     | 339         | 0           | 1653.23 |
| protein lethal(2)essential for life-like                        | 199         | 4.789E-120  | 1647.92 |
| multiple epidermal growth factor-like domains protein 10        | 439         | 0           | 1636.78 |
| 60S acidic ribosomal protein P2                                 | 113         | 3.91801E-45 | 1623.52 |
| 40S ribosomal protein S26                                       | 114         | 1.2361E-79  | 1614.36 |
| PREDICTED: uncharacterized protein LOC107067669                 | 154         | 8.59526E-30 | 1613.6  |
| sorbitol dehydrogenase-like                                     | 339         | 0           | 1611.55 |
| cytochrome c oxidase subunit 5B, mitochondrial-like             | 119         | 1.0331E-75  | 1591.03 |



|                                                                         |     |             |         |
|-------------------------------------------------------------------------|-----|-------------|---------|
| heat shock protein 83                                                   | 719 | 0           | 1567.01 |
| very-long-chain 3-oxoacyl-CoA reductase-like isoform X2                 | 328 | 0           | 1552.89 |
| 60S ribosomal protein L44-like                                          | 104 | 9.86798E-70 | 1547.4  |
| gamma-glutamyl hydrolase-like                                           | 322 | 3.1087E-141 | 1532.77 |
| icarapin-like                                                           | 214 | 1.1551E-102 | 1494.51 |
| TNF receptor-associated factor family protein DDB_G0272098-like         | 681 | 6.91366E-50 | 1474.55 |
| fatty acid synthase-like                                                | 105 | 7.84848E-36 | 1460.32 |
| 60S acidic ribosomal protein P1                                         | 113 | 4.31168E-50 | 1422.12 |
| 60S ribosomal protein L36                                               | 115 | 1.67197E-76 | 1406.9  |
| iron-sulfur cluster assembly enzyme ISCU, mitochondrial isoform X2      | 167 | 1.7596E-111 | 1406.46 |
| 40S ribosomal protein S8-like                                           | 208 | 2.1546E-150 | 1378.01 |
| ecdysteroid-regulated 16 kDa protein                                    | 155 | 1.62337E-92 | 1374.79 |
| elongation of very long chain fatty acids protein AAEL008004 isoform X2 | 321 | 0           | 1357.76 |
| inositol oxygenase                                                      | 295 | 0           | 1356.77 |
| 60S ribosomal protein L13                                               | 219 | 1.4312E-141 | 1346.79 |
| NA                                                                      | 105 |             | 1340.61 |
| 40S ribosomal protein S24                                               | 133 | 1.8262E-88  | 1339.09 |
| 40S ribosomal protein S16-like                                          | 148 | 5.9546E-103 | 1301.65 |
| 40S ribosomal protein S15Aa                                             | 130 | 3.48336E-92 | 1269.09 |
| 60S ribosomal protein L31                                               | 123 | 1.75486E-87 | 1256.52 |
| ubiquitin-40S ribosomal protein S27a                                    | 156 | 3.7254E-112 | 1250.64 |
| 40S ribosomal protein S11-like                                          | 155 | 3.0677E-111 | 1245.13 |
| 60S ribosomal protein L27a                                              | 147 | 9.4128E-100 | 1237.26 |
| 60S ribosomal protein L34-like                                          | 119 | 7.26154E-81 | 1217.25 |
| 60S ribosomal protein L23                                               | 140 | 3.81261E-97 | 1214.9  |
| 40S ribosomal protein S3                                                | 241 | 1.6939E-176 | 1214.37 |
| 40S ribosomal protein S23                                               | 143 | 9.2454E-101 | 1209    |
| putative fatty acyl-CoA reductase CG5065                                | 509 | 0           | 1195.7  |
| leucine-rich repeat-containing protein 15-like                          | 632 | 0           | 1189.03 |
| elongation of very long chain fatty acids protein AAEL008004-like       | 260 | 2.93806E-91 | 1161.08 |
| cytochrome c-2                                                          | 108 | 1.47226E-74 | 1159.42 |
| NA                                                                      | 117 |             | 1148.32 |
| sorbitol dehydrogenase-like isoform X1                                  | 349 | 0           | 1147.95 |
| 60S ribosomal protein L11 isoform X2                                    | 197 | 1.4024E-135 | 1147.6  |
| peptidyl-prolyl cis-trans isomerase-like                                | 209 | 1.1551E-141 | 1137.63 |
| 40S ribosomal protein S4-like                                           | 262 | 0           | 1136.24 |
| 40S ribosomal protein S7                                                | 193 | 2.3281E-138 | 1127.23 |
| 40S ribosomal protein S10-like                                          | 159 | 3.3052E-110 | 1127.02 |
| 60S ribosomal protein L10                                               | 219 | 1.0592E-162 | 1125.34 |
| translationally-controlled tumor protein homolog                        | 172 | 5.54E-120   | 1121.22 |
| MD-2-related lipid-recognition protein-like                             | 169 | 1.9239E-99  | 1120.33 |
| 60S ribosomal protein L5                                                | 297 | 0           | 1113.35 |

**Table S2.** Annotation of top 100 highly expressed genes in the venom gland of *Vespa crabro*.

| Putative venom protein/peptide                                                 | Length (aa) | E-value     | TPM     |
|--------------------------------------------------------------------------------|-------------|-------------|---------|
| venom allergen 5 precursor                                                     | 225         | 2.2134E-93  | 150567  |
| phospholipase A1-like                                                          | 333         | 2.2333E-122 | 49149   |
| NA                                                                             | 103         |             | 40090.3 |
| phospholipase A1                                                               | 336         | 2.0077E-131 | 17931.7 |
| hyaluronidase                                                                  | 363         | 1.5998E-158 | 10228.7 |
| hyaluronidase                                                                  | 357         | 0           | 7237.97 |
| phospholipase A1-like                                                          | 147         | 1.0798E-29  | 6969.16 |
| 40S ribosomal protein S3a                                                      | 270         | 0           | 5173.18 |
| acidic phospholipase A2 PA4                                                    | 258         | 4.2512E-118 | 4722.07 |
| ubiquitin-60S ribosomal protein L40-like isoform X1                            | 128         | 5.68352E-91 | 4353.79 |
| 60S ribosomal protein L18                                                      | 188         | 2.2918E-129 | 4104.13 |
| thioredoxin-2                                                                  | 105         | 6.42154E-64 | 4067.02 |
| venom dipeptidyl peptidase 4 isoform X1                                        | 776         | 0           | 3726.38 |
| 40S ribosomal protein S25                                                      | 119         | 1.4342E-80  | 3647.54 |
| NADH dehydrogenase subunit 1 (mitochondrion)                                   | 111         | 5.49533E-62 | 3629.56 |
| polyubiquitin isoform X1                                                       | 447         | 0           | 3579.21 |
| NA                                                                             | 105         |             | 3478.14 |
| 40S ribosomal protein S16-like                                                 | 148         | 5.9546E-103 | 3467.11 |
| 60S ribosomal protein L23                                                      | 140         | 3.81261E-97 | 3454.68 |
| PREDICTED: uncharacterized protein LOC105667370                                | 132         | 7.83238E-72 | 3409.23 |
| 40S ribosomal protein S17                                                      | 130         | 3.29733E-92 | 3361.41 |
| NA                                                                             | 105         |             | 3344.44 |
| translation elongation factor 2                                                | 844         | 0           | 3341.65 |
| 40S ribosomal protein S8-like                                                  | 208         | 2.1546E-150 | 3196.12 |
| NA                                                                             | 104         |             | 3156.64 |
| 40S ribosomal protein S26                                                      | 114         | 1.2361E-79  | 3138.78 |
| 40S ribosomal protein S5                                                       | 215         | 7.3059E-157 | 3104.45 |
| 40S ribosomal protein S15Aa                                                    | 130         | 3.48336E-92 | 3065.46 |
| 60S acidic ribosomal protein P2                                                | 113         | 1.12343E-45 | 2913.04 |
| ubiquitin-40S ribosomal protein S27a                                           | 156         | 3.7254E-112 | 2824.1  |
| 40S ribosomal protein S20                                                      | 121         | 2.89712E-82 | 2779.94 |
| 40S ribosomal protein S11-like                                                 | 155         | 3.0677E-111 | 2775.21 |
| 60S ribosomal protein L9                                                       | 210         | 3.9774E-142 | 2768.23 |
| heat shock 70 kDa protein cognate 4                                            | 648         | 0           | 2767.16 |
| 60S acidic ribosomal protein P0                                                | 317         | 0           | 2760.96 |
| 60S ribosomal protein L28                                                      | 138         | 1.31109E-90 | 2738.18 |
| 60S ribosomal protein L10                                                      | 219         | 1.0592E-162 | 2678.74 |
| uncharacterized protein LOC105432314                                           | 111         | 2.25403E-22 | 2677.41 |
| 40S ribosomal protein S4-like                                                  | 262         | 0           | 2661.91 |
| NA                                                                             | 101         |             | 2641.18 |
| 60S ribosomal protein L5                                                       | 297         | 0           | 2587.42 |
| 60S ribosomal protein L26                                                      | 148         | 1.2951E-103 | 2550.47 |
| ATP synthase lipid-binding protein, mitochondrial                              | 137         | 7.9294E-77  | 2491.2  |
| translationally-controlled tumor protein homolog                               | 172         | 5.54E-120   | 2480.36 |
| 40S ribosomal protein S23                                                      | 143         | 9.2454E-101 | 2457.48 |
| polyubiquitin-A isoform X3                                                     | 291         | 0           | 2445.81 |
| 60S ribosomal protein L44-like                                                 | 104         | 9.86798E-70 | 2439.31 |
| eukaryotic initiation factor 4A-I                                              | 423         | 0           | 2412.44 |
| death-associated protein 1                                                     | 102         | 1.2317E-67  | 2366.63 |
| 40S ribosomal protein S13                                                      | 151         | 4.2192E-108 | 2288.46 |
| 60S ribosomal protein L13a                                                     | 213         | 4.5379E-147 | 2222.75 |
| 60S ribosomal protein L22-like                                                 | 139         | 3.87926E-95 | 2201.51 |
| 40S ribosomal protein S10-like                                                 | 159         | 3.3052E-110 | 2195.2  |
| 60S ribosomal protein L11 isoform X2                                           | 195         | 2.2129E-135 | 2157.09 |
| 60S ribosomal protein L34-like                                                 | 119         | 7.26154E-81 | 2155.72 |
| coiled-coil-helix-coiled-coil-helix domain-containing protein 2, mitochondrial | 154         | 3.00812E-68 | 2126.6  |
| 60S ribosomal protein L31                                                      | 164         | 8.14544E-87 | 2098.98 |
| 40S ribosomal protein S3                                                       | 241         | 1.6939E-176 | 2094.33 |

|                                                |     |             |         |
|------------------------------------------------|-----|-------------|---------|
| elongation factor 1-alpha-like                 | 462 | 0           | 2050.05 |
| 40S ribosomal protein S2                       | 299 | 0           | 1980.91 |
| 60S acidic ribosomal protein P1                | 113 | 7.91728E-71 | 1964.2  |
| 60S ribosomal protein L23a                     | 247 | 1.0812E-134 | 1959.15 |
| 60S ribosomal protein L17                      | 185 | 4.8212E-137 | 1942.5  |
| 60S ribosomal protein L4                       | 430 | 0           | 1920.49 |
| 40S ribosomal protein S9 isoform X1            | 193 | 3.1021E-137 | 1915.35 |
| 60S ribosomal protein L13                      | 219 | 1.4312E-141 | 1876.92 |
| pheromone-binding protein Gp-9-like            | 155 | 1.29655E-11 | 1798.82 |
| 40S ribosomal protein S6-like                  | 253 | 0           | 1764.43 |
| 60S ribosomal protein L7a                      | 268 | 0           | 1756.17 |
| superoxide dismutase [Cu-Zn]                   | 155 | 2.04388E-98 | 1746.1  |
| 60S ribosomal protein L27a                     | 147 | 9.4128E-100 | 1742.13 |
| 40S ribosomal protein S7                       | 193 | 2.3281E-138 | 1734.61 |
| 60S ribosomal protein L24                      | 170 | 3.4322E-108 | 1732.99 |
| 60S ribosomal protein L21                      | 159 | 3.539E-114  | 1722.9  |
| 60S ribosomal protein L35a                     | 146 | 4.3344E-99  | 1675    |
| 60S ribosomal protein L14                      | 152 | 5.20947E-94 | 1673.07 |
| elongation factor 1-alpha                      | 462 | 0           | 1657.72 |
| 60S ribosomal protein L7                       | 251 | 9.5337E-175 | 1657.47 |
| neuromodulin-like                              | 123 | 3.60628E-75 | 1648.97 |
| 40S ribosomal protein S24                      | 182 | 4.27727E-88 | 1632.48 |
| 60S ribosomal protein L32                      | 134 | 1.06E-95    | 1632.36 |
| NA                                             | 112 |             | 1592.55 |
| small integral membrane protein 14             | 119 | 1.2993E-41  | 1580.27 |
| 40S ribosomal protein SA                       | 310 | 0           | 1568.71 |
| 60S ribosomal protein L36                      | 116 | 2.00284E-73 | 1564.55 |
| polyadenylate-binding protein 1                | 630 | 0           | 1564.04 |
| eukaryotic translation initiation factor 5A    | 160 | 6.0794E-117 | 1531.03 |
| 60S ribosomal protein L35                      | 123 | 2.35088E-75 | 1530.74 |
| 60S ribosomal protein L6-like                  | 294 | 2.0469E-164 | 1489.7  |
| peptidyl-prolyl cis-trans isomerase FKBP1A     | 109 | 6.27042E-73 | 1488.98 |
| 60S ribosomal protein L18a isoform X1          | 177 | 2.1819E-129 | 1482.82 |
| 40S ribosomal protein S14                      | 151 | 4.0919E-107 | 1466.24 |
| 40S ribosomal protein S12                      | 141 | 3.15101E-98 | 1453.13 |
| heat shock 70 kDa protein cognate 3 isoform X1 | 660 | 0           | 1420.89 |
| 60S ribosomal protein L19                      | 213 | 1.3511E-142 | 1411.92 |
| ADP,ATP carrier protein                        | 300 | 0           | 1402.05 |
| 40S ribosomal protein S19                      | 172 | 8.4478E-110 | 1374.99 |
| 60S ribosomal protein L30                      | 114 | 2.38148E-80 | 1373.81 |
| protein lethal(2)essential for life-like       | 281 | 6.51907E-78 | 1355.37 |
| probable Bax inhibitor 1                       | 236 | 8.4515E-140 | 1324.37 |

**Table S3.** Annotation of top 100 highly expressed genes in the venom gland of *Vespa dybowskii*.

| Putative venom protein/peptide                                                  | Length (aa) | E-value   | TPM     |
|---------------------------------------------------------------------------------|-------------|-----------|---------|
| phospholipase A1-like                                                           | 269         | 7.93E-86  | 106395  |
| phospholipase A1-like                                                           | 165         | 1.16E-72  | 79401.2 |
| venom allergen 5 precursor                                                      | 225         | 4.04E-93  | 65462.1 |
| NA                                                                              | 103         |           | 36744.6 |
| phospholipase A1-like                                                           | 269         | 2.72E-82  | 9560.53 |
| small integral membrane protein 14                                              | 107         | 1.88E-32  | 6491.82 |
| death-associated protein 1                                                      | 102         | 1.23E-67  | 5498.15 |
| hyaluronidase                                                                   | 335         | 1.31E-180 | 4566.41 |
| translation elongation factor 2                                                 | 137         | 2.23E-78  | 4476.1  |
| pheromone-binding protein Gp-9-like                                             | 153         | 7.65E-11  | 4156.36 |
| cytochrome P450 4g15                                                            | 559         | 0         | 4033.09 |
| hyaluronidase                                                                   | 359         | 7.15E-153 | 3902.61 |
| 60S ribosomal protein L31                                                       | 104         | 4.09E-48  | 3875.06 |
| 60S ribosomal protein L5-like                                                   | 113         | 1.34E-74  | 3213.1  |
| protein lethal(2)essential for life-like                                        | 275         | 2.17E-67  | 3163.41 |
| 40S ribosomal protein S26                                                       | 114         | 1.24E-79  | 3126.55 |
| 60S acidic ribosomal protein P2                                                 | 113         | 1.70E-39  | 2890.28 |
| phospholipase A1 2-like                                                         | 170         | 2.81E-52  | 2827.42 |
| polyubiquitin-B isoform X1                                                      | 260         | 0         | 2557.65 |
| PREDICTED: uncharacterized protein LOC105667370                                 | 132         | 6.95E-63  | 2543.59 |
| translation elongation factor 2                                                 | 844         | 0         | 2393.31 |
| NA                                                                              | 106         |           | 2262.34 |
| 60S ribosomal protein L10                                                       | 111         | 9.43E-79  | 2254.17 |
| ATP synthase lipid-binding protein, mitochondrial                               | 137         | 7.09E-34  | 2198.42 |
| venom dipeptidyl peptidase 4 isoform X1                                         | 776         | 0         | 2175.87 |
| NA                                                                              | 103         |           | 2160.17 |
| ADP,ATP carrier protein 2                                                       | 300         | 0         | 2148.53 |
| PREDICTED: uncharacterized protein LOC106784194                                 | 173         | 6.37E-55  | 2125.47 |
| coiled-coil-helix-coiled-coil-helix domain-containing protein 10, mitochondrial | 154         | 2.10E-45  | 2114.62 |
| 40S ribosomal protein S25                                                       | 119         | 4.39E-50  | 2078.58 |
| apidaecins type 22-like isoform X2                                              | 172         | 6.06E-14  | 1996.14 |
| NA                                                                              | 102         |           | 1985.15 |
| phospholipase A1-like                                                           | 169         | 9.75E-74  | 1944.05 |
| 60S acidic ribosomal protein P1 isoform X1                                      | 113         | 2.35E-37  | 1924.34 |
| BCL2/adenovirus E1B 19 kDa protein-interacting protein 3 isoform X2             | 107         | 3.61E-46  | 1772.15 |
| probable Bax inhibitor 1                                                        | 236         | 3.23E-131 | 1771.97 |
| acyl-CoA Delta(11) desaturase-like                                              | 367         | 0         | 1723.81 |
| superoxide dismutase [Cu-Zn]                                                    | 155         | 2.04E-98  | 1701.54 |
| NA                                                                              | 106         |           | 1675.7  |
| phospholipase A1-like                                                           | 99          | 3.96E-15  | 1666.26 |
| PREDICTED: uncharacterized protein LOC100881835                                 | 130         | 7.14E-41  | 1583.69 |
| NA                                                                              | 102         |           | 1567.1  |
| 40S ribosomal protein S18 isoform X1                                            | 101         | 6.94E-67  | 1562.59 |
| eukaryotic initiation factor 4A-I                                               | 218         | 2.49E-159 | 1558.58 |
| NA                                                                              | 102         |           | 1547.47 |
| acidic phospholipase A2 PA4                                                     | 258         | 2.18E-118 | 1546.9  |
| heat shock 70 kDa protein cognate 4                                             | 648         | 0         | 1540.24 |
| 40S ribosomal protein S24                                                       | 130         | 7.01E-78  | 1524.66 |
| 60S ribosomal protein L17                                                       | 185         | 4.64E-128 | 1412.79 |
| PREDICTED: uncharacterized protein LOC107072577 isoform X2                      | 296         | 1.39E-180 | 1408.73 |
| PREDICTED: uncharacterized protein LOC107074702                                 | 109         | 4.28E-12  | 1406.67 |
| NA                                                                              | 144         |           | 1385.15 |
| acidic leucine-rich nuclear phosphoprotein 32 family member B-like              | 115         | 6.91E-09  | 1373.07 |
| acidic leucine-rich nuclear phosphoprotein 32 family member B-like              | 115         | 6.91E-09  | 1373.07 |
| NA                                                                              | 103         |           | 1369.59 |
| eukaryotic translation initiation factor 4E-binding protein 3                   | 114         | 2.03E-54  | 1365.43 |
| translationally-controlled tumor protein homolog                                | 172         | 4.89E-108 | 1347.2  |
| translationally-controlled tumor protein homolog                                | 172         | 4.89E-108 | 1347.2  |

|                                                                     |     |           |         |
|---------------------------------------------------------------------|-----|-----------|---------|
| acidic phospholipase A2 PA4-like isoform X2                         | 228 | 4.29E-143 | 1327.03 |
| peroxiredoxin 1                                                     | 193 | 4.00E-133 | 1304.85 |
| 60S acidic ribosomal protein P0                                     | 317 | 0         | 1304.18 |
| venom serine protease-like                                          | 390 | 1.55E-175 | 1300.86 |
| NA                                                                  | 111 |           | 1299.19 |
| polyubiquitin-B                                                     | 175 | 2.73E-116 | 1266.39 |
| glyceraldehyde-3-phosphate dehydrogenase 1-like                     | 194 | 1.10E-127 | 1266.33 |
| NA                                                                  | 110 |           | 1260.44 |
| NA                                                                  | 110 |           | 1260.44 |
| 40S ribosomal protein S19                                           | 154 | 7.07E-100 | 1252.99 |
| 40S ribosomal protein S17                                           | 168 | 8.45E-92  | 1234.17 |
| 40S ribosomal protein S8                                            | 208 | 8.50E-142 | 1230.63 |
| protein FAM195A-like isoform X2                                     | 106 | 9.86E-68  | 1229.86 |
| 40S ribosomal protein S16-like                                      | 148 | 1.05E-103 | 1216.15 |
| chitinase-like protein Idgf4                                        | 253 | 2.47E-169 | 1206.69 |
| PREDICTED: uncharacterized protein LOC106793063                     | 195 | 8.59E-94  | 1198.74 |
| 40S ribosomal protein S2                                            | 281 | 4.08E-158 | 1190.81 |
| 60S ribosomal protein L13a                                          | 204 | 2.76E-147 | 1189.41 |
| 60S ribosomal protein L30                                           | 114 | 2.38E-80  | 1171.09 |
| bifunctional glutamate/proline--tRNA ligase                         | 103 | 1.22E-35  | 1170.22 |
| icarapin-like                                                       | 220 | 8.96E-99  | 1166.85 |
| NA                                                                  | 100 |           | 1160.17 |
| CCHC-type zinc finger protein CG3800                                | 154 | 2.08E-87  | 1146.23 |
| 40S ribosomal protein S13                                           | 151 | 4.22E-108 | 1141.12 |
| activating transcription factor of chaperone                        | 371 | 0         | 1135.58 |
| NA                                                                  | 100 |           | 1109.51 |
| cytochrome c-2                                                      | 108 | 1.47E-74  | 1090.29 |
| polyadenylate-binding protein 1                                     | 630 | 0         | 1047.46 |
| NA                                                                  | 105 |           | 1037.49 |
| serine-arginine protein 55 isoform X15                              | 112 | 9.96E-54  | 1035.61 |
| ATPase inhibitor mai-2, mitochondrial-like                          | 107 | 4.51E-28  | 1007.3  |
| NA                                                                  | 103 |           | 999     |
| NA                                                                  | 99  |           | 986.527 |
| profilin                                                            | 126 | 1.25E-89  | 980.569 |
| 40S ribosomal protein S5                                            | 215 | 7.31E-157 | 977.662 |
| elongation factor 1-alpha                                           | 462 | 0         | 963.045 |
| 60S ribosomal protein L5                                            | 297 | 0         | 937.6   |
| V-type proton ATPase 16 kDa proteolipid subunit                     | 159 | 4.88E-99  | 929.883 |
| proton-coupled amino acid transporter 1                             | 470 | 0         | 921.511 |
| BCL2/adenovirus E1B 19 kDa protein-interacting protein 3 isoform X2 | 193 | 2.64E-110 | 916.725 |
| NA                                                                  | 99  |           | 910.543 |
| 60S ribosomal protein L4                                            | 430 | 0         | 888.187 |

Table S3

**Table S4.** Annotation of top 100 highly expressed genes in the venom gland of *Vespa simillima*.

| Putative venom protein/peptide                                     | Length (aa) | E-value     | TPM     |
|--------------------------------------------------------------------|-------------|-------------|---------|
| NA                                                                 | 108         |             | 297476  |
| NA                                                                 | 112         |             | 39206.8 |
| NA                                                                 | 112         |             | 39206.8 |
| venom allergen 5 precursor                                         | 225         | 2.76884E-92 | 32241.1 |
| uncharacterized protein LOC105432314                               | 111         | 6.36057E-23 | 29699.6 |
| phospholipase A1-like                                              | 333         | 5.769E-124  | 29422.8 |
| NA                                                                 | 112         |             | 23327.1 |
| NA                                                                 | 106         |             | 14561.6 |
| protein lethal(2)essential for life-like                           | 210         | 3.83287E-73 | 5349.74 |
| tryptophan 5-hydroxylase 1                                         | 528         | 0           | 5193.15 |
| phospholipase A1-like                                              | 336         | 3.97E-125   | 4314.92 |
| phospholipase A1-like                                              | 335         | 1.6524E-135 | 4042.11 |
| polyubiquitin-B                                                    | 194         | 2.0006E-124 | 3749.93 |
| coiled-coil and C2 domain-containing protein 1-like isoform X2     | 154         | 2.29815E-19 | 3534.86 |
| tryptophan 5-hydroxylase 1                                         | 164         | 3.7697E-87  | 3463.45 |
| nuclear protein 1                                                  | 99          | 4.71075E-47 | 2945.97 |
| nuclear protein 1                                                  | 99          | 4.71075E-47 | 2945.97 |
| polyubiquitin                                                      | 147         | 1.995E-102  | 2594.43 |
| ATP synthase lipid-binding protein, mitochondrial                  | 137         | 5.34903E-35 | 2280.9  |
| PREDICTED: uncharacterized protein LOC108691125                    | 125         | 5.10977E-59 | 2245.91 |
| PREDICTED: uncharacterized protein LOC108691125                    | 125         | 5.10977E-59 | 2245.91 |
| PREDICTED: uncharacterized protein LOC106787088                    | 144         | 6.96387E-51 | 2160.93 |
| eukaryotic translation initiation factor 4E-binding protein 3      | 114         | 2.03375E-54 | 1829.19 |
| heat shock 70 kDa protein cognate 4                                | 648         | 0           | 1820.18 |
| heat shock 70 kDa protein cognate 4                                | 648         | 0           | 1820.18 |
| WD repeat domain phosphoinositide-interacting protein 4 isoform X2 | 344         | 0           | 1617.63 |
| fatty acyl-CoA reductase 1                                         | 517         | 0           | 1616.34 |
| translationally-controlled tumor protein homolog                   | 172         | 4.8892E-108 | 1582.16 |
| 40S ribosomal protein S26                                          | 114         | 1.2361E-79  | 1503.24 |
| eukaryotic initiation factor 4A-I                                  | 423         | 0           | 1486.79 |
| peptidyl-prolyl cis-trans isomerase FKBP1A                         | 109         | 6.27042E-73 | 1477.8  |
| hyaluronidase                                                      | 358         | 1.0264E-163 | 1409.24 |
| 60S ribosomal protein L34-like                                     | 90          | 2.95828E-58 | 1398.12 |
| 40S ribosomal protein S25                                          | 119         | 4.39327E-50 | 1385.76 |
| farnesol dehydrogenase-like isoform X2                             | 251         | 6.9847E-123 | 1374.34 |
| PREDICTED: uncharacterized protein LOC106791229 isoform X1         | 564         | 0           | 1374.34 |
| death-associated protein 1                                         | 102         | 1.2317E-67  | 1373.78 |
| ADP,ATP carrier protein                                            | 300         | 0           | 1341.74 |
| uncharacterized protein LOC113563422                               | 230         | 2.39125E-18 | 1291.49 |
| 60S ribosomal protein L31                                          | 123         | 1.13224E-78 | 1218.27 |
| PREDICTED: uncharacterized protein LOC106790403 isoform X1         | 439         | 0           | 1212.27 |
| 60S ribosomal protein L26                                          | 105         | 2.88869E-56 | 1172.2  |
| endocuticle structural glycoprotein SgAbd-1-like                   | 143         | 3.2667E-100 | 1131.83 |
| probable Bax inhibitor 1                                           | 236         | 3.2338E-131 | 1105.94 |
| cytochrome c oxidase subunit 5B, mitochondrial-like                | 119         | 8.11477E-76 | 1105.13 |
| NA                                                                 | 105         |             | 1066.8  |
| elongation factor 1-alpha                                          | 462         | 0           | 1066.8  |
| 60S ribosomal protein L10                                          | 223         | 7.3648E-163 | 1056.64 |
| 28S ribosomal protein S14, mitochondrial                           | 159         | 2.05558E-70 | 1029.53 |
| 60S acidic ribosomal protein P0                                    | 317         | 0           | 1010.46 |
| 60S ribosomal protein L5                                           | 297         | 0           | 980.012 |
| 40S ribosomal protein S20                                          | 121         | 2.89712E-82 | 960.289 |
| acidic phospholipase A2 PA4                                        | 258         | 3.6582E-119 | 951.932 |
| acidic phospholipase A2 PA4                                        | 258         | 3.6582E-119 | 951.932 |
| 40S ribosomal protein S17                                          | 164         | 9.06632E-92 | 949.156 |
| cytochrome c oxidase subunit 6A1, mitochondrial-like               | 106         | 1.73943E-21 | 945.854 |
| gamma-aminobutyric acid receptor-associated protein                | 117         | 3.16001E-82 | 899.93  |
| NADH dehydrogenase subunit 5 (mitochondrion)                       | 212         | 9.45627E-96 | 873.711 |

|                                                                     |     |             |         |
|---------------------------------------------------------------------|-----|-------------|---------|
| splicing factor 3A subunit 2                                        | 273 | 2.2795E-150 | 854.677 |
| small integral membrane protein 14                                  | 107 | 1.8802E-32  | 840.191 |
| zinc finger CCHC domain-containing protein 8 homolog                | 613 | 0           | 840.191 |
| ecdysteroid-regulated 16 kDa protein                                | 155 | 8.72462E-85 | 828.321 |
| superoxide dismutase [Cu-Zn]                                        | 155 | 9.5867E-99  | 827.882 |
| quinone oxidoreductase isoform X2                                   | 402 | 0           | 826.635 |
| PREDICTED: uncharacterized protein LOC106783854                     | 124 | 5.29466E-64 | 820.009 |
| neuromodulin-like                                                   | 123 | 2.23086E-39 | 811.801 |
| peptidyl-prolyl cis-trans isomerase-like                            | 209 | 1.1551E-141 | 800.578 |
| 60S ribosomal protein L36                                           | 115 | 1.67197E-76 | 790.984 |
| NADPH--cytochrome P450 reductase isoform X1                         | 679 | 0           | 789.954 |
| choline/ethanolamine kinase isoform X2                              | 113 | 3.90141E-49 | 778.563 |
| NA                                                                  | 109 |             | 764.437 |
| translation elongation factor 2                                     | 844 | 0           | 731.363 |
| translation elongation factor 2                                     | 844 | 0           | 731.363 |
| PREDICTED: uncharacterized protein LOC106790187                     | 115 | 3.30736E-50 | 726.037 |
| icarapin-like                                                       | 220 | 8.59648E-90 | 724.779 |
| eukaryotic translation initiation factor 5A                         | 160 | 6.0794E-117 | 719.532 |
| aldose reductase-like                                               | 317 | 0           | 718.15  |
| 40S ribosomal protein S14                                           | 151 | 6.07936E-79 | 713.523 |
| 40S ribosomal protein S5                                            | 237 | 3.7218E-156 | 712.872 |
| BCL2/adenovirus E1B 19 kDa protein-interacting protein 3 isoform X2 | 193 | 1.3647E-109 | 702.966 |
| V-type proton ATPase 16 kDa proteolipid subunit                     | 159 | 4.8795E-99  | 698.898 |
| PREDICTED: uncharacterized protein LOC106789874                     | 108 | 1.22085E-55 | 694.133 |
| 60S ribosomal protein L11                                           | 195 | 1.572E-126  | 690.449 |
| ATPase inhibitor mai-2, mitochondrial-like                          | 107 | 3.52276E-27 | 688.704 |
| coiled-coil-helix-coiled-coil-helix domain-containing protein 10    | 154 | 2.09651E-45 | 682.595 |
| coiled-coil-helix-coiled-coil-helix domain-containing protein 10    | 154 | 2.09651E-45 | 682.595 |
| coiled-coil-helix-coiled-coil-helix domain-containing protein 10    | 154 | 2.09651E-45 | 682.595 |
| 40S ribosomal protein S2                                            | 281 | 4.0831E-158 | 675.056 |
| 40S ribosomal protein S16-like                                      | 148 | 1.0513E-103 | 673.385 |
| 60S ribosomal protein L18                                           | 188 | 5.7713E-118 | 653.329 |
| PREDICTED: uncharacterized protein LOC107064284 isoform X5          | 120 | 3.32612E-42 | 653.329 |
| activating transcription factor of chaperone                        | 371 | 0           | 652.104 |
| 60S ribosomal protein L13a                                          | 216 | 9.0683E-147 | 650.813 |
| NA                                                                  | 102 |             | 649     |
| PREDICTED: uncharacterized protein LOC106787992                     | 301 | 0           | 639.07  |
| PREDICTED: uncharacterized protein LOC106787992                     | 301 | 0           | 639.07  |
| PREDICTED: uncharacterized protein LOC106787992                     | 301 | 0           | 639.07  |
| 40S ribosomal protein S13                                           | 152 | 3.4913E-108 | 617.856 |
| 40S ribosomal protein S7                                            | 193 | 1.1818E-118 | 616.557 |
| polyubiquitin-like                                                  | 362 | 0           | 608.42  |

**Table S5.** Annotation of top 100 highly expressed genes in the venom gland of *Parapolybia varia*.

| Putative venom protein/peptide                                                  | Length (aa) | E-value     | TPM     |
|---------------------------------------------------------------------------------|-------------|-------------|---------|
| NA                                                                              | 101         |             | 71487.6 |
| PREDICTED: uncharacterized protein LOC107072057                                 | 99          | 1.27082E-49 | 27704.7 |
| NA                                                                              | 103         |             | 16002.4 |
| myosin light chain alkali isoform X2                                            | 152         | 2.1101E-103 | 14710.7 |
| venom allergen 5 precursor                                                      | 227         | 1.9919E-119 | 13212.1 |
| myosin heavy chain, muscle-like                                                 | 133         | 1.9917E-91  | 9740.15 |
| myosin regulatory light chain 2                                                 | 148         | 2.9942E-105 | 9409.86 |
| vitellogenin-like                                                               | 1748        | 0           | 8934.66 |
| myosin regulatory light chain 2                                                 | 213         | 2.5138E-108 | 6733.3  |
| flexible cuticle protein 12-like                                                | 105         | 1.98352E-61 | 6608.22 |
| cytochrome P450 4g15                                                            | 557         | 0           | 6579.14 |
| phospholipase A1 1                                                              | 335         | 6.7806E-154 | 6440.22 |
| phospholipase A1 1                                                              | 335         | 6.7806E-154 | 6440.22 |
| NA                                                                              | 130         |             | 6382.83 |
| myosin heavy chain, muscle isoform X9                                           | 1427        | 0           | 6306.11 |
| actin, muscle                                                                   | 376         | 0           | 6000.51 |
| actin, muscle                                                                   | 376         | 0           | 6000.51 |
| myosin heavy chain, muscle isoform X10                                          | 490         | 0           | 5856.66 |
| ejaculatory bulb-specific protein 3                                             | 104         | 4.86151E-57 | 5684.88 |
| NA                                                                              | 165         |             | 5475.5  |
| paramyosin, long form                                                           | 876         | 0           | 4916.34 |
| troponin I isoform X11                                                          | 125         | 8.5634E-44  | 4803.56 |
| PREDICTED: uncharacterized protein LOC108778990                                 | 112         | 3.18281E-20 | 4755.63 |
| arginine kinase                                                                 | 375         | 0           | 4687.24 |
| tropomyosin isoform X22                                                         | 283         | 6.29E-146   | 4446.21 |
| endocuticle structural glycoprotein SgAbd-1-like                                | 143         | 4.3555E-99  | 4404.39 |
| cytochrome c-2                                                                  | 108         | 1.09788E-73 | 4203.66 |
| ATP synthase lipid-binding protein, mitochondrial                               | 138         | 1.52976E-34 | 4027.82 |
| troponin T, skeletal muscle isoform X1                                          | 397         | 5.0798E-179 | 3829.37 |
| acidic leucine-rich nuclear phosphoprotein 32 family member B-like              | 115         | 9.03214E-09 | 3246.53 |
| troponin I isoform X5                                                           | 212         | 3.41711E-89 | 3219.33 |
| actin, muscle                                                                   | 376         | 0           | 3175.84 |
| actin, muscle                                                                   | 376         | 0           | 3175.84 |
| actin, muscle                                                                   | 376         | 0           | 3175.84 |
| ADP,ATP carrier protein 2                                                       | 300         | 0           | 3062.33 |
| PREDICTED: uncharacterized protein LOC106785313 isoform X2                      | 253         | 3.8595E-168 | 2961.32 |
| PREDICTED: uncharacterized protein LOC106793063                                 | 195         | 2.741E-119  | 2610.52 |
| protein lethal(2)essential for life-like isoform X2                             | 100         | 2.1468E-61  | 2493.56 |
| NA                                                                              | 107         |             | 2482.63 |
| PREDICTED: uncharacterized protein LOC106787274                                 | 144         | 4.14012E-58 | 2439.31 |
| NADH dehydrogenase subunit 5 (mitochondrion)                                    | 237         | 7.3597E-129 | 2211.34 |
| ejaculatory bulb-specific protein 3-like                                        | 129         | 1.90255E-79 | 2167.36 |
| NA                                                                              | 111         |             | 2080.7  |
| PREDICTED: uncharacterized protein LOC107997824                                 | 116         | 5.75911E-22 | 2023.64 |
| GATA zinc finger domain-containing protein 14-like                              | 126         | 1.76615E-36 | 1977.89 |
| NA                                                                              | 105         |             | 1947.81 |
| tropomyosin-1                                                                   | 284         | 0           | 1924.16 |
| tropomyosin-1                                                                   | 284         | 0           | 1924.16 |
| NA                                                                              | 100         |             | 1913.88 |
| NA                                                                              | 100         |             | 1913.88 |
| death-associated protein 1                                                      | 102         | 8.3872E-68  | 1838.31 |
| endocuticle structural glycoprotein SgAbd-4-like                                | 134         | 5.59819E-71 | 1826.12 |
| PREDICTED: uncharacterized protein LOC106783771                                 | 295         | 8.4168E-162 | 1822.18 |
| ATP synthase subunit g, mitochondrial                                           | 100         | 5.94266E-57 | 1760.04 |
| coiled-coil-helix-coiled-coil-helix domain-containing protein 10, mitochondrial | 151         | 1.27944E-45 | 1749.93 |
| venom serine protease precursor                                                 | 275         | 2.1005E-124 | 1737.2  |
| four and a half LIM domains protein 2 isoform X8                                | 344         | 0           | 1666.69 |
| defensin-1-like                                                                 | 101         | 1.252E-42   | 1652.27 |



|                                                                                |      |             |         |
|--------------------------------------------------------------------------------|------|-------------|---------|
| NA                                                                             | 108  |             | 1648.46 |
| NA                                                                             | 99   |             | 1626.26 |
| V-type proton ATPase 16 kDa proteolipid subunit                                | 159  | 4.3959E-103 | 1570.66 |
| NA                                                                             | 121  |             | 1497.74 |
| NA                                                                             | 103  |             | 1456.95 |
| NA                                                                             | 103  |             | 1456.95 |
| troponin C, isoform 2-like                                                     | 159  | 4.13169E-89 | 1404.8  |
| putative ATP synthase subunit f, mitochondrial                                 | 107  | 1.49423E-66 | 1397.64 |
| ATP-dependent RNA helicase p62-like isoform X2                                 | 117  | 3.71513E-55 | 1396.43 |
| cytochrome c oxidase subunit 5B, mitochondrial-like                            | 120  | 2.40232E-79 | 1368.23 |
| PREDICTED: uncharacterized protein LOC106785155                                | 262  | 2.246E-125  | 1356.79 |
| ferritin subunit                                                               | 219  | 5.875E-108  | 1355.36 |
| CCHC-type zinc finger protein CG3800                                           | 154  | 6.71129E-88 | 1338.05 |
| fructose-bisphosphate aldolase-like                                            | 365  | 0           | 1326.07 |
| calcium-transporting ATPase sarcoplasmic/endoplasmic reticulum type isoform X2 | 1002 | 0           | 1306.83 |
| calcium-transporting ATPase sarcoplasmic/endoplasmic reticulum type isoform X2 | 1002 | 0           | 1306.83 |
| calcium-transporting ATPase sarcoplasmic/endoplasmic reticulum type isoform X2 | 1002 | 0           | 1306.83 |
| PREDICTED: uncharacterized protein LOC107997824                                | 118  | 4.77421E-29 | 1302.54 |
| NA                                                                             | 134  |             | 1251.75 |
| NA                                                                             | 110  |             | 1212.96 |
| elongation of very long chain fatty acids protein 1-like                       | 105  | 2.19376E-31 | 1198.59 |
| probable Bax inhibitor 1                                                       | 237  | 8.998E-150  | 1195.64 |
| neuromodulin-like                                                              | 123  | 1.2022E-40  | 1192.43 |
| NA                                                                             | 100  |             | 1174.61 |
| ATPase inhibitor mai-2, mitochondrial-like                                     | 104  | 2.84229E-53 | 1163.88 |
| peptidyl-prolyl cis-trans isomerase-like                                       | 104  | 1.17655E-67 | 1121.5  |
| polyadenylate-binding protein 1                                                | 630  | 0           | 1120.72 |
| PREDICTED: uncharacterized protein LOC106790187                                | 116  | 3.82666E-61 | 1117.26 |
| NA                                                                             | 101  |             | 1094.29 |
| GATA zinc finger domain-containing protein 14-like                             | 115  | 3.78527E-32 | 1089.43 |
| NA                                                                             | 110  |             | 1089.24 |
| NA                                                                             | 110  |             | 1089.24 |
| NA                                                                             | 110  |             | 1089.24 |
| NA                                                                             | 99   |             | 1075.52 |
| NA                                                                             | 99   |             | 1075.52 |
| leucine-rich repeat-containing protein 15-like                                 | 631  | 0           | 1048.65 |
| ecdysteroid-regulated 16 kDa protein                                           | 156  | 1.87234E-82 | 1044.27 |
| chitinase-like protein Idgf4                                                   | 434  | 0           | 1015.76 |
| acyl-CoA Delta(11) desaturase-like                                             | 354  | 0           | 1015    |
| myosin heavy chain, muscle isoform X9                                          | 1177 | 0           | 1009.84 |
| NA                                                                             | 113  |             | 1002.76 |
| hornerin-like isoform X1                                                       | 123  | 2.34556E-31 | 999.512 |

**Table S6.** Annotation of top 100 highly expressed genes in the venom gland of *Polistes rothneyi*.

| Putative venom protein/peptide                                     | Length (aa) | E-value     | TPM     |
|--------------------------------------------------------------------|-------------|-------------|---------|
| protein AAR2 homolog                                               | 383         | 0           | 6436.25 |
| protein lethal(2)essential for life-like                           | 196         | 2.3236E-117 | 5446.11 |
| RING finger protein 10                                             | 725         | 0           | 5120.23 |
| cytochrome P450 4g15                                               | 364         | 0           | 4499.09 |
| cytochrome P450 4g15                                               | 186         | 2.6801E-130 | 4283.4  |
| uncharacterized protein LOC111674363                               | 104         | 1.87695E-26 | 4110.57 |
| polyubiquitin                                                      | 111         | 3.30796E-74 | 4023.94 |
| CCHC-type zinc finger protein CG3800                               | 154         | 6.71129E-88 | 3920.57 |
| endocuticle structural glycoprotein SgAbd-1-like                   | 143         | 5.8166E-102 | 3779.37 |
| NA                                                                 | 130         |             | 3672.33 |
| protein lethal(2)essential for life-like                           | 259         | 2.421E-112  | 3447.35 |
| 60S acidic ribosomal protein P2                                    | 113         | 8.41733E-36 | 3004.64 |
| maternal effect protein oskar                                      | 408         | 0           | 2908.16 |
| maternal effect protein oskar                                      | 408         | 0           | 2908.16 |
| ATP synthase lipid-binding protein, mitochondrial                  | 138         | 6.2839E-42  | 2889.68 |
| peptidyl-prolyl cis-trans isomerase FKBP1A                         | 109         | 1.61042E-76 | 2875.64 |
| 60S ribosomal protein L44 isoform X2                               | 104         | 6.99126E-59 | 2737.42 |
| neuromodulin-like                                                  | 124         | 1.70975E-32 | 2734.53 |
| acidic leucine-rich nuclear phosphoprotein 32 family member B-like | 115         | 6.91458E-09 | 2694.33 |
| phospholipase A1 1                                                 | 149         | 5.19726E-59 | 2670.99 |
| histone H4                                                         | 103         | 3.0554E-52  | 2583.47 |
| elongation factor 1-alpha-like                                     | 462         | 0           | 2521.73 |
| NA                                                                 | 139         |             | 2473.92 |
| profilin                                                           | 126         | 1.24751E-89 | 2387.71 |
| actin-5C                                                           | 376         | 0           | 2123.81 |
| serine/threonine-protein kinase 17B-like                           | 339         | 3.4039E-141 | 2047.41 |
| 60S acidic ribosomal protein P1                                    | 113         | 4.26991E-44 | 1982.63 |
| thioredoxin-2-like                                                 | 108         | 3.86025E-71 | 1967.86 |
| polyubiquitin-B                                                    | 180         | 2.6767E-110 | 1954.76 |
| heat shock protein 83                                              | 719         | 0           | 1906.72 |
| histidine protein methyltransferase 1 homolog isoform X1           | 281         | 0           | 1868.44 |
| heat shock protein 70 A2-like                                      | 640         | 0           | 1800.44 |
| tubulin alpha-1 chain                                              | 450         | 0           | 1778.78 |
| nuclease-sensitive element-binding protein 1 isoform X3            | 278         | 6.8825E-101 | 1620.37 |
| proliferation-associated protein 2G4                               | 107         | 1.62911E-61 | 1606.61 |
| polyadenylate-binding protein 1                                    | 630         | 0           | 1544.8  |
| NA                                                                 | 125         |             | 1525.37 |
| cytochrome c-2                                                     | 108         | 1.97421E-75 | 1520.72 |
| nuclease-sensitive element-binding protein 1 isoform X2            | 257         | 8.8298E-101 | 1499.03 |
| NA                                                                 | 186         |             | 1459.73 |
| ubiquitin-conjugating enzyme E2-17 kDa                             | 147         | 5.2792E-108 | 1444.65 |
| phospholipase A1-like                                              | 247         | 6.4567E-165 | 1437.65 |
| calcium-binding mitochondrial carrier protein SCaMC-2 isoform X1   | 99          | 2.21536E-44 | 1429.87 |
| NA                                                                 | 117         |             | 1395.9  |
| cytoplasmic polyadenylation element-binding protein 1 isoform X1   | 724         | 0           | 1379.05 |
| NA                                                                 | 113         |             | 1376.8  |
| NA                                                                 | 113         |             | 1376.8  |
| putative ATP-dependent RNA helicase me31b isoform X1               | 444         | 0           | 1376.12 |
| PREDICTED: uncharacterized protein LOC106793063                    | 110         | 1.46813E-52 | 1352.74 |
| phospholipase A1                                                   | 237         | 3.3936E-154 | 1335.53 |
| 40S ribosomal protein S24                                          | 130         | 3.37939E-91 | 1320.79 |
| uncharacterized protein LOC113219351                               | 127         | 2.06939E-61 | 1311.63 |
| tubulin beta-1 chain-like                                          | 447         | 0           | 1308.91 |
| peroxiredoxin 1-like                                               | 193         | 1.7059E-140 | 1294.58 |
| maternal protein exuperantia                                       | 432         | 0           | 1294.21 |
| elongation factor 1-alpha                                          | 462         | 0           | 1293.16 |
| hyaluronidase                                                      | 321         | 0           | 1275.32 |
| 40S ribosomal protein S20                                          | 121         | 4.1396E-84  | 1268.25 |

|                                                                                 |      |             |         |
|---------------------------------------------------------------------------------|------|-------------|---------|
| PREDICTED: uncharacterized protein LOC107068002                                 | 128  | 3.15289E-79 | 1264.41 |
| phospholipase A1-like                                                           | 338  | 0           | 1245.99 |
| dnaJ homolog subfamily A member 4                                               | 135  | 2.90697E-92 | 1245.55 |
| dnaJ homolog subfamily A member 4                                               | 135  | 2.90697E-92 | 1245.55 |
| high mobility group protein DSP1-like                                           | 200  | 4.1447E-116 | 1233.87 |
| 60S ribosomal protein L8                                                        | 257  | 3.5675E-171 | 1225    |
| 60S ribosomal protein L8                                                        | 176  | 2.4748E-108 | 1225    |
| vitellogenin-like                                                               | 1753 | 0           | 1201.48 |
| histone H2A-like                                                                | 124  | 3.23327E-73 | 1192.35 |
| heat shock 70 kDa protein cognate 3 isoform X1                                  | 659  | 0           | 1168.33 |
| coiled-coil-helix-coiled-coil-helix domain-containing protein 10, mitochondrial | 151  | 3.30855E-45 | 1166.59 |
| 40S ribosomal protein S2                                                        | 281  | 1.4491E-162 | 1154.64 |
| multiple epidermal growth factor-like domains protein 10                        | 156  | 3.48494E-82 | 1150.43 |
| 60S ribosomal protein L36                                                       | 115  | 1.16071E-77 | 1147.82 |
| death-associated protein 1                                                      | 102  | 4.29303E-55 | 1131.13 |
| death-associated protein 1                                                      | 102  | 4.29303E-55 | 1131.13 |
| 4-coumarate--CoA ligase 1-like                                                  | 540  | 0           | 1115.37 |
| polyubiquitin-B                                                                 | 275  | 0           | 1108.97 |
| small integral membrane protein 14                                              | 107  | 1.25171E-62 | 1108.7  |
| NA                                                                              | 102  |             | 1067.6  |
| NA                                                                              | 102  |             | 1066.52 |
| 60S ribosomal protein L22-like                                                  | 139  | 2.6337E-75  | 1065.29 |
| guanine nucleotide-binding protein G(I)/G(S)/G(T) subunit beta-1                | 340  | 0           | 1059.19 |
| phospholipase A1-like                                                           | 151  | 2.80069E-94 | 1058.56 |
| PREDICTED: uncharacterized protein LOC107071063                                 | 112  | 4.51628E-46 | 1052.12 |
| multiple epidermal growth factor-like domains protein 10                        | 450  | 0           | 1041.45 |
| nucleoplasmn-like protein isoform X1                                            | 180  | 7.53694E-86 | 1027.96 |
| RNA-binding protein squid-like                                                  | 288  | 3.1323E-162 | 1026.92 |
| NA                                                                              | 124  |             | 1023.58 |
| NA                                                                              | 101  |             | 1020.68 |
| V-type proton ATPase 16 kDa proteolipid subunit                                 | 158  | 9.3708E-105 | 1015.34 |
| eukaryotic translation initiation factor 5A                                     | 160  | 6.0794E-117 | 1009.54 |
| 40S ribosomal protein S10-like                                                  | 159  | 2.3886E-101 | 1007.51 |
| 40S ribosomal protein S11                                                       | 125  | 8.46688E-77 | 996.721 |
| triosephosphate isomerase                                                       | 247  | 7.595E-180  | 991.605 |
| 40S ribosomal protein S26                                                       | 114  | 1.2361E-79  | 986.479 |
| 60S ribosomal protein L13a                                                      | 204  | 3.6209E-148 | 986.124 |
| KIF1-binding protein                                                            | 609  | 0           | 984.809 |
| aromatic-L-amino-acid decarboxylase isoform X2                                  | 480  | 0           | 973.187 |
| NA                                                                              | 100  |             | 963.428 |
| 60S acidic ribosomal protein P0                                                 | 317  | 0           | 948.082 |
| venom serine protease precursor                                                 | 276  | 8.819E-148  | 947.08  |

**Table S7.** Annotation of top 100 highly expressed genes in the venom gland of *Polistes snelleni*.

| Putative venom protein/peptide                                     | Length (aa) | E-value     | TPM     |
|--------------------------------------------------------------------|-------------|-------------|---------|
| NA                                                                 | 100         |             | 27570.9 |
| 60S ribosomal protein L44 isoform X2                               | 104         | 6.99126E-59 | 4758.78 |
| PREDICTED: uncharacterized protein LOC105556196                    | 130         | 1.57216E-21 | 4751.47 |
| protein lethal(2)essential for life-like                           | 196         | 4.2543E-130 | 4315.87 |
| NA                                                                 | 99          |             | 3838.97 |
| acidic leucine-rich nuclear phosphoprotein 32 family member B-like | 115         | 6.91458E-09 | 3823.34 |
| histone H4                                                         | 103         | 3.0554E-52  | 3791.88 |
| uncharacterized protein LOC112694992                               | 102         | 4.5849E-16  | 3473.16 |
| heat shock 70 kDa protein cognate 4                                | 651         | 0           | 3346.65 |
| osteomodulin-like                                                  | 108         | 1.98351E-29 | 3197.85 |
| protein LSM14 homolog B isoform X2                                 | 484         | 0           | 2965.88 |
| CCHC-type zinc finger protein CG3800                               | 154         | 6.71129E-88 | 2746.42 |
| myosin regulatory light chain sqh                                  | 174         | 3.32E-108   | 2534.73 |
| PREDICTED: uncharacterized protein LOC106750966                    | 105         | 2.93777E-47 | 2497.82 |
| 60S acidic ribosomal protein P2                                    | 113         | 1.40776E-35 | 2457.65 |
| NA                                                                 | 103         |             | 2448.35 |
| maternal effect protein oskar                                      | 405         | 0           | 2351.24 |
| maternal effect protein oskar                                      | 405         | 0           | 2351.24 |
| maternal effect protein oskar                                      | 405         | 0           | 2351.24 |
| death-associated protein 1                                         | 102         | 4.29303E-55 | 2131.21 |
| neuromodulin-like                                                  | 125         | 8.09347E-31 | 2019.99 |
| NA                                                                 | 116         |             | 1972.77 |
| RNA-binding protein 1-like isoform X1                              | 101         | 7.82736E-58 | 1890.25 |
| NA                                                                 | 270         |             | 1877.5  |
| histone H2A-like                                                   | 135         | 4.05999E-66 | 1741.64 |
| protein lethal(2)essential for life-like                           | 269         | 1.1758E-103 | 1677.86 |
| histone H2B-like                                                   | 123         | 6.41587E-61 | 1654.78 |
| cofilin/actin-depolymerizing factor homolog                        | 148         | 1.2444E-106 | 1619.77 |
| histone H2A-like                                                   | 124         | 3.23327E-73 | 1610.83 |
| NA                                                                 | 138         |             | 1582.04 |
| 60S acidic ribosomal protein P1                                    | 115         | 3.67313E-40 | 1497.99 |
| NA                                                                 | 150         |             | 1492.14 |
| NA                                                                 | 107         |             | 1475.97 |
| something about silencing protein 10                               | 464         | 0           | 1471.54 |
| calmodulin-like                                                    | 149         | 4.5592E-104 | 1427.86 |
| serine-arginine protein 55 isoform X15                             | 112         | 9.95766E-54 | 1398.12 |
| NA                                                                 | 102         |             | 1390.67 |
| cytochrome c-2                                                     | 108         | 8.59688E-75 | 1372.89 |
| heat shock protein 83                                              | 123         | 9.41377E-79 | 1369.18 |
| histone H3.3-like isoform X1                                       | 136         | 6.60532E-95 | 1342.56 |
| gamma-aminobutyric acid receptor-associated protein                | 117         | 3.16001E-82 | 1336.57 |
| chaoptin-like                                                      | 121         | 3.74509E-39 | 1326.87 |
| nucleoplasmin-like protein isoform X1                              | 180         | 1.51941E-85 | 1320.83 |
| histone H4                                                         | 103         | 3.0554E-52  | 1296.89 |
| 60S ribosomal protein L14                                          | 152         | 7.69376E-75 | 1284.48 |
| profilin                                                           | 126         | 1.24751E-89 | 1277.44 |
| heterogeneous nuclear ribonucleoprotein K-like isoform X1          | 100         | 3.49929E-62 | 1273.93 |
| eukaryotic translation initiation factor 5                         | 448         | 0           | 1268.73 |
| 60S ribosomal protein L37                                          | 110         | 1.04509E-52 | 1264.17 |
| NA                                                                 | 102         |             | 1251.16 |
| NA                                                                 | 104         |             | 1239.18 |
| NA                                                                 | 113         |             | 1236.89 |
| nuclease-sensitive element-binding protein 1 isoform X4            | 257         | 1.20632E-95 | 1218.56 |
| nuclease-sensitive element-binding protein 1 isoform X4            | 257         | 1.20632E-95 | 1218.56 |
| 40S ribosomal protein S9 isoform X2                                | 137         | 2.53581E-94 | 1218.11 |
| 60S ribosomal protein L34-like                                     | 119         | 2.37791E-70 | 1217.68 |
| NA                                                                 | 100         |             | 1198.83 |
| 14-3-3 protein zeta isoform X2                                     | 247         | 1.1652E-170 | 1196.85 |

|                                                                              |      |             |         |
|------------------------------------------------------------------------------|------|-------------|---------|
| NA                                                                           | 127  |             | 1169.05 |
| ATPase inhibitor mai-2, mitochondrial-like                                   | 104  | 2.41622E-58 | 1148.33 |
| ubiquitin-conjugating enzyme E2-17 kDa                                       | 147  | 5.2792E-108 | 1146.41 |
| guanine nucleotide-binding protein subunit beta-like protein-like isoform X2 | 111  | 6.45701E-73 | 1142    |
| protein CDV3 homolog                                                         | 101  | 1.11836E-69 | 1137.59 |
| NA                                                                           | 103  |             | 1133.44 |
| actin-5C                                                                     | 376  | 0           | 1132.88 |
| actin-5C                                                                     | 376  | 0           | 1132.88 |
| putative fatty acyl-CoA reductase CG5065                                     | 205  | 1.8918E-111 | 1130.34 |
| tubulin alpha-1 chain                                                        | 450  | 0           | 1105.36 |
| cytoplasmic polyadenylation element-binding protein 1 isoform X2             | 506  | 0           | 1103.52 |
| NA                                                                           | 114  |             | 1103.52 |
| NA                                                                           | 111  |             | 1096.02 |
| eukaryotic initiation factor 4A-I                                            | 424  | 0           | 1089.43 |
| uncharacterized protein LOC113219351                                         | 122  | 1.46801E-61 | 1087.41 |
| heat shock protein 83                                                        | 599  | 0           | 1070.21 |
| putative ATP synthase subunit f, mitochondrial                               | 107  | 4.87724E-71 | 1069.15 |
| 40S ribosomal protein S24                                                    | 130  | 3.37939E-91 | 1065.57 |
| tubulin beta-1 chain-like                                                    | 447  | 0           | 1062.4  |
| NA                                                                           | 99   |             | 1058.83 |
| 40S ribosomal protein S15Aa                                                  | 130  | 2.12552E-92 | 1051.47 |
| putative ATP-dependent RNA helicase me31b isoform X1                         | 444  | 0           | 1048.03 |
| 60S ribosomal protein L36                                                    | 115  | 1.16071E-77 | 1042.85 |
| 60S ribosomal protein L36                                                    | 115  | 1.16071E-77 | 1042.85 |
| PREDICTED: uncharacterized protein LOC106784792 isoform X4                   | 122  | 1.02265E-53 | 1041.07 |
| polyadenylate-binding protein-interacting protein 2 isoform X1               | 154  | 8.36777E-81 | 1039.94 |
| NA                                                                           | 133  |             | 1030.98 |
| DNA-directed RNA polymerase I subunit RPA1                                   | 1701 | 0           | 1029.07 |
| DNA-directed RNA polymerase I subunit RPA1                                   | 1686 | 0           | 1029.07 |
| NA                                                                           | 127  |             | 998.34  |
| elongation factor 1-alpha-like                                               | 462  | 0           | 998.34  |
| PREDICTED: uncharacterized protein LOC107071462 isoform X1                   | 114  | 9.92706E-24 | 992.701 |
| polyadenylate-binding protein 1                                              | 630  | 0           | 983.885 |
| nuclease-sensitive element-binding protein 1 isoform X2                      | 278  | 5.12495E-97 | 975.057 |
| zinc finger CCCH domain-containing protein 11A-like                          | 180  | 5.6233E-118 | 965.472 |
| V-type proton ATPase 16 kDa proteolipid subunit                              | 158  | 9.3708E-105 | 961.406 |
| polyubiquitin-B                                                              | 193  | 1.7E-114    | 953.371 |
| cytoplasmic polyadenylation element-binding protein 1 isoform X3             | 686  | 0           | 925.739 |
| upstream activation factor subunit spp27                                     | 261  | 6.56107E-65 | 891.394 |
| ATP synthase-coupling factor 6, mitochondrial isoform X2                     | 102  | 1.1481E-56  | 891.144 |
| short-chain specific acyl-CoA dehydrogenase, mitochondrial                   | 374  | 0           | 886.294 |
| uncharacterized protein LOC105432314                                         | 110  | 1.6379E-15  | 873.66  |

**Table S8.** Annotation of top 100 highly expressed genes in the venom gland of *Eumenes decoratus*.

| Putative venom protein/peptide                       | Length (aa) | E-value     | TPM     |
|------------------------------------------------------|-------------|-------------|---------|
| NA                                                   | 127         |             | 156798  |
| phospholipase A2-like                                | 184         | 6.17849E-18 | 55093.1 |
| neprilysin-4                                         | 727         | 4.1271E-127 | 29479.9 |
| neprilysin-1 isoform X2                              | 161         | 8.29179E-13 | 22484.6 |
| neprilysin-4                                         | 431         | 4.97005E-51 | 22484.6 |
| chymotrypsin-2                                       | 257         | 6.88856E-86 | 22354.5 |
| hyaluronidase                                        | 131         | 4.10134E-36 | 13836.2 |
| NA                                                   | 105         |             | 11934.3 |
| NA                                                   | 117         |             | 11257.4 |
| heat shock 70 kDa protein cognate 3 isoform X1       | 663         | 0           | 9684.18 |
| hyaluronidase                                        | 372         | 2.9394E-146 | 8510.5  |
| bromodomain-containing protein 7 isoform X2          | 499         | 0           | 8022.82 |
| protein disulfide-isomerase A3                       | 492         | 0           | 6598.28 |
| calreticulin                                         | 439         | 0           | 6324.36 |
| zinc finger CCHC domain-containing protein 8 homolog | 619         | 0           | 5569.94 |
| NA                                                   | 105         |             | 5569.94 |
| small integral membrane protein 14                   | 107         | 2.71472E-43 | 5569.94 |
| NA                                                   | 121         |             | 4993.46 |
| tachykinins isoform X2                               | 296         | 1.043E-127  | 4758.35 |
| hyaluronidase                                        | 248         | 3.97446E-97 | 4627.23 |
| NA                                                   | 116         |             | 4404.85 |
| neprilysin-11-like                                   | 100         | 6.60277E-12 | 4174.16 |
| protein disulfide-isomerase                          | 495         | 0           | 4038.13 |
| 60S acidic ribosomal protein P2                      | 113         | 6.87784E-33 | 3451    |
| uncharacterized protein LOC111694314                 | 126         | 3.97218E-55 | 3107.4  |
| uncharacterized protein LOC111694314                 | 126         | 3.97218E-55 | 3107.4  |
| NA                                                   | 108         |             | 3021.46 |
| NA                                                   | 105         |             | 2956.33 |
| membrane metallo-endopeptidase-like 1                | 261         | 8.56933E-28 | 2845.82 |
| NA                                                   | 114         |             | 2824.35 |
| NA                                                   | 116         |             | 2824.35 |
| membrane metallo-endopeptidase-like 1                | 705         | 2.47594E-78 | 2769.52 |
| endothelin-converting enzyme 1 isoform X2            | 266         | 1.14487E-23 | 2749.87 |
| neprilysin-4                                         | 511         | 3.3985E-41  | 2733.02 |
| 60S ribosomal protein L9                             | 113         | 4.84104E-78 | 2675.6  |
| protein dimmed-like isoform X2                       | 204         | 2.5615E-92  | 2551.17 |
| DNA-directed RNA polymerase I subunit RPA1           | 555         | 0           | 2509.63 |
| endothelin-converting enzyme 1-like                  | 145         | 2.28021E-28 | 2497.57 |
| neprilysin-4                                         | 711         | 2.19471E-74 | 2482.39 |
| neuroligin 5 isoform X2                              | 100         | 1.90663E-07 | 2473.33 |
| transmembrane protein 14C                            | 110         | 4.72221E-42 | 2400.84 |
| NA                                                   | 101         |             | 2342.63 |
| NA                                                   | 106         |             | 2342.63 |
| NA                                                   | 124         |             | 2342.63 |
| NA                                                   | 124         |             | 2342.63 |
| NA                                                   | 109         |             | 2342.63 |
| NA                                                   | 109         |             | 2342.63 |
| NA                                                   | 117         |             | 2244.04 |
| NA                                                   | 117         |             | 2244.04 |
| NA                                                   | 117         |             | 2244.04 |
| NA                                                   | 117         |             | 2244.04 |
| endothelin-converting enzyme 1                       | 276         | 7.66949E-42 | 2205.84 |
| 40S ribosomal protein S25                            | 119         | 1.94623E-43 | 2126.65 |
| neprilysin-4                                         | 735         | 2.5462E-84  | 2044.96 |
| NA                                                   | 136         |             | 1950.15 |
| NA                                                   | 136         |             | 1950.15 |
| NA                                                   | 136         |             | 1950.15 |

|                                                             |     |             |         |
|-------------------------------------------------------------|-----|-------------|---------|
| NA                                                          | 136 |             | 1950.15 |
| neprilysin-4                                                | 450 | 1.83907E-53 | 1947.92 |
| NA                                                          | 110 |             | 1846.22 |
| alpha-amylase-like                                          | 489 | 0           | 1844.15 |
| mesencephalic astrocyte-derived neurotrophic factor homolog | 175 | 4.99E-103   | 1757.36 |
| mesencephalic astrocyte-derived neurotrophic factor homolog | 175 | 4.99E-103   | 1757.36 |
| mesencephalic astrocyte-derived neurotrophic factor homolog | 175 | 4.99E-103   | 1757.36 |
| 60S ribosomal protein L31                                   | 123 | 1.13224E-78 | 1722.53 |
| von Hippel-Lindau-like protein                              | 184 | 2.76941E-56 | 1712.92 |
| 40S ribosomal protein S24                                   | 130 | 1.78742E-75 | 1641.4  |
| NA                                                          | 105 |             | 1624.04 |
| probable Bax inhibitor 1                                    | 237 | 2.6442E-124 | 1597.12 |
| NA                                                          | 99  |             | 1595.14 |
| 40S ribosomal protein SA                                    | 311 | 1.7763E-174 | 1556.49 |
| death-associated protein 1                                  | 102 | 8.15391E-52 | 1547.97 |
| neprilysin-4                                                | 415 | 4.34837E-58 | 1542.72 |
| neprilysin-11-like                                          | 673 | 1.24782E-76 | 1542.7  |
| 60S ribosomal protein L36                                   | 115 | 3.02459E-76 | 1495.46 |
| elongation factor 1-alpha                                   | 310 | 0           | 1462.86 |
| 40S ribosomal protein S17                                   | 130 | 3.29733E-92 | 1449.19 |
| NA                                                          | 146 |             | 1444.44 |
| NA                                                          | 119 |             | 1431.77 |
| NA                                                          | 119 |             | 1431.77 |
| 60S ribosomal protein L28                                   | 138 | 2.76087E-58 | 1430.19 |
| neuromodulin-like                                           | 125 | 4.78893E-26 | 1424.61 |
| neprilysin-4                                                | 523 | 8.71117E-37 | 1422.08 |
| protein disulfide-isomerase A6                              | 435 | 0           | 1411.18 |
| NA                                                          | 124 |             | 1403.25 |
| 40S ribosomal protein S3a                                   | 267 | 4.5317E-175 | 1396.8  |
| 40S ribosomal protein S10-like                              | 176 | 2.7434E-103 | 1381.97 |
| 60S ribosomal protein L22-like                              | 139 | 2.16366E-69 | 1357.27 |
| 40S ribosomal protein S19                                   | 154 | 1.4626E-109 | 1341.13 |
| neprilysin-4                                                | 514 | 3.08126E-38 | 1318.2  |
| heat shock 70 kDa protein cognate 4                         | 651 | 0           | 1304.39 |
| 60S ribosomal protein L23                                   | 140 | 3.81261E-97 | 1292.79 |
| ras-related protein Rab-2                                   | 214 | 1.2708E-142 | 1270.27 |
| 60S ribosomal protein L27a                                  | 147 | 3.14724E-84 | 1259.73 |
| NA                                                          | 103 |             | 1232.92 |
| elongation factor 1-alpha-like                              | 158 | 1.4291E-110 | 1210.05 |
| elongation factor 1-alpha-like                              | 158 | 1.4291E-110 | 1210.05 |
| 60S ribosomal protein L30                                   | 114 | 1.68095E-79 | 1209.45 |
| polyubiquitin-like                                          | 106 | 3.41699E-69 | 1184.87 |

**Table S9.** Annotation of top 100 highly expressed genes in the venom gland of *Sphecidae* sp.

| Putative venom protein/peptide                                | Length (aa) | E-value     | TPM     |
|---------------------------------------------------------------|-------------|-------------|---------|
| ejaculatory bulb-specific protein 3-like                      | 105         | 2.43611E-40 | 38623.6 |
| PREDICTED: uncharacterized protein LOC106744880 isoform X1    | 103         | 4.93001E-13 | 25626.7 |
| PREDICTED: uncharacterized protein LOC108576964               | 104         | 2.89939E-06 | 12293.1 |
| NA                                                            | 106         |             | 9508.08 |
| PREDICTED: uncharacterized protein LOC107224416               | 115         | 7.76162E-18 | 8758.77 |
| transmembrane and TPR repeat-containing protein CG4341-like   | 432         | 0           | 8481.03 |
| eukaryotic translation initiation factor 4 gamma 2 isoform X1 | 867         | 0           | 6591.7  |
| NA                                                            | 255         |             | 6168    |
| NA                                                            | 190         |             | 5352.56 |
| fibrous sheath CABYR-binding protein                          | 462         | 9.00398E-09 | 5213.69 |
| NA                                                            | 111         |             | 5172.02 |
| PREDICTED: uncharacterized protein LOC108576964               | 140         | 2.74545E-15 | 5137.12 |
| endocuticle structural glycoprotein SgAbd-1-like              | 143         | 3.45001E-89 | 4846.7  |
| NA                                                            | 117         |             | 4375.28 |
| PREDICTED: uncharacterized protein LOC108573181               | 138         | 5.22269E-71 | 4371.14 |
| rap1 GTPase-activating protein 1 isoform X1                   | 126         | 3.92449E-12 | 4250.01 |
| PREDICTED: uncharacterized protein LOC108553831 isoform X1    | 390         | 3.06622E-98 | 3751.49 |
| PREDICTED: uncharacterized protein LOC107186552               | 131         | 3.07513E-20 | 3751.49 |
| PREDICTED: uncharacterized protein LOC100878814               | 287         | 3.56032E-72 | 3751.49 |
| ATP synthase lipid-binding protein, mitochondrial             | 138         | 1.32986E-55 | 3662.05 |
| chitinase-like protein EN03 isoform X2                        | 434         | 0           | 3108.74 |
| NA                                                            | 111         |             | 3101.49 |
| icarapin-like                                                 | 231         | 3.57886E-71 | 2857.12 |
| uncharacterized protein LOC105276036                          | 233         | 1.34838E-49 | 2750.53 |
| ADP/ATP translocase                                           | 300         | 0           | 2701.61 |
| V-type proton ATPase subunit G                                | 118         | 4.7656E-49  | 2673.97 |
| thioredoxin-2                                                 | 105         | 4.83586E-56 | 2661.08 |
| U1 small nuclear ribonucleoprotein 70 kDa-like isoform X1     | 264         | 1.48391E-66 | 2471.08 |
| neprilysin-11-like                                            | 725         | 0           | 2409.32 |
| NA                                                            | 99          |             | 2359.79 |
| NA                                                            | 120         |             | 2359.79 |
| PREDICTED: uncharacterized protein LOC107998437               | 134         | 2.5225E-79  | 2359.79 |
| NA                                                            | 120         |             | 2359.79 |
| NA                                                            | 175         |             | 2252.88 |
| NA                                                            | 120         |             | 2252.88 |
| NA                                                            | 175         |             | 2252.88 |
| NA                                                            | 120         |             | 2219.95 |
| NA                                                            | 99          |             | 2219.95 |
| NA                                                            | 99          |             | 2219.95 |
| NA                                                            | 120         |             | 2219.95 |
| PREDICTED: uncharacterized protein LOC107998437               | 134         | 2.5225E-79  | 2209.55 |
| RING-type E3 ubiquitin-protein ligase PPIL2                   | 521         | 0           | 2209.55 |
| carbonic anhydrase 2 isoform X2                               | 273         | 0           | 2182.06 |
| uncharacterized protein LOC112455139                          | 105         | 1.20122E-23 | 2174.22 |
| uncharacterized protein LOC112455139                          | 105         | 1.20122E-23 | 2174.22 |
| uncharacterized protein LOC112455139                          | 105         | 1.20122E-23 | 2174.22 |
| actin-5, muscle-specific                                      | 376         | 0           | 2163.23 |
| protein translation factor SUI1 homolog                       | 110         | 1.11081E-78 | 2100.58 |
| NA                                                            | 100         |             | 1990.61 |
| uncharacterized protein LOC105259235 isoform X3               | 104         | 8.00196E-50 | 1929.93 |
| death-associated protein 1                                    | 102         | 3.0827E-56  | 1918.24 |
| sodium/potassium-transporting ATPase subunit alpha-like       | 122         | 1.5971E-62  | 1883.62 |
| NA                                                            | 129         |             | 1868.09 |
| ferritin-1 heavy chain-like                                   | 169         | 9.542E-102  | 1856.18 |
| troponin C-like isoform X1                                    | 158         | 2.85462E-94 | 1849.43 |
| 60S ribosomal protein L44 isoform X2                          | 104         | 6.99126E-59 | 1802.73 |
| adenylosuccinate lyase isoform X1                             | 485         | 0           | 1762.78 |
| arginine kinase                                               | 374         | 0           | 1742.3  |



|                                                                   |      |             |         |
|-------------------------------------------------------------------|------|-------------|---------|
| arginine kinase                                                   | 374  | 0           | 1742.3  |
| elongation factor 1-alpha                                         | 461  | 0           | 1710.8  |
| PREDICTED: uncharacterized protein LOC106792090                   | 870  | 0           | 1676.08 |
| tropomyosin isoform X7                                            | 256  | 3.2402E-123 | 1673.86 |
| heat shock 70 kDa protein cognate 4                               | 651  | 0           | 1655.18 |
| heat shock 70 kDa protein cognate 4                               | 651  | 0           | 1655.18 |
| PREDICTED: uncharacterized protein LOC107186552                   | 131  | 3.07513E-20 | 1616.03 |
| PREDICTED: uncharacterized protein LOC108553831 isoform X1        | 390  | 3.06622E-98 | 1616.03 |
| cyclin-dependent kinase 2-like isoform X2                         | 197  | 9.2424E-136 | 1607.55 |
| myosin light chain alkali isoform X2                              | 152  | 1.2952E-100 | 1607.55 |
| PREDICTED: uncharacterized protein LOC100878241 isoform X2        | 262  | 2.5372E-149 | 1584.25 |
| actin-5C                                                          | 376  | 0           | 1511.69 |
| V-type proton ATPase 16 kDa proteolipid subunit NA                | 108  | 1.69071E-52 | 1502.57 |
| NA                                                                | 115  |             | 1489.38 |
| translationally-controlled tumor protein homolog                  | 172  | 2.0329E-116 | 1488.15 |
| retinoic acid receptor RXR-alpha-B isoform X1                     | 427  | 0           | 1488.15 |
| polyubiquitin-A isoform X3                                        | 340  | 0           | 1485    |
| putative ATP synthase subunit f, mitochondrial                    | 107  | 2.91427E-56 | 1447.32 |
| 60S acidic ribosomal protein P2 isoform X1                        | 113  | 1.92376E-34 | 1400.17 |
| chitinase-like protein Idgf4                                      | 127  | 8.6145E-77  | 1393.47 |
| chitinase-like protein Idgf4                                      | 127  | 8.6145E-77  | 1393.47 |
| chitinase-like protein Idgf4                                      | 127  | 8.6145E-77  | 1393.47 |
| paramyosin, long form                                             | 876  | 0           | 1380.32 |
| small integral membrane protein 14                                | 104  | 1.55694E-33 | 1348.01 |
| NA                                                                | 110  |             | 1338.86 |
| lysosomal aspartic protease                                       | 106  | 2.54104E-46 | 1324.53 |
| fructose-bisphosphate aldolase isoform X2                         | 365  | 0           | 1309.84 |
| cytochrome b-c1 complex subunit 7                                 | 109  | 8.04268E-47 | 1273.98 |
| NA                                                                | 101  |             | 1235.26 |
| polyubiquitin-B                                                   | 170  | 4.6681E-118 | 1228.37 |
| 60S ribosomal protein L18                                         | 136  | 1.95494E-79 | 1221.69 |
| uncharacterized protein LOC105829392, partial                     | 118  | 5.56258E-20 | 1203.05 |
| 1-phosphatidylinositol 4,5-bisphosphate phosphodiesterase gamma-1 | 1021 | 0           | 1185.52 |
| PREDICTED: uncharacterized protein LOC108570283                   | 136  | 3.58796E-46 | 1179.63 |
| ATPase inhibitor mai-2, mitochondrial isoform X1                  | 103  | 3.61954E-31 | 1171.57 |
| 40S ribosomal protein S24-like isoform X2                         | 132  | 1.24409E-79 | 1127.32 |
| NA                                                                | 104  |             | 1099.75 |
| PREDICTED: uncharacterized protein LOC107997824                   | 133  | 1.25068E-43 | 1087.64 |
| alpha-crystallin B chain isoform X1                               | 229  | 3.1588E-133 | 1084.07 |
| actin                                                             | 185  | 5.3788E-137 | 1076.72 |
| NA                                                                | 111  |             | 1072.24 |
| otopetrin-3-like                                                  | 107  | 4.42075E-36 | 1063.28 |

**Table S10.** Annotation of top 100 highly expressed genes in the venom gland of *Anterhynchium flavomarginatum*.

| Putative venom protein/peptide                                                     | Length (aa) | E-value   | TPM     |
|------------------------------------------------------------------------------------|-------------|-----------|---------|
| NA                                                                                 | 102         |           | 83726   |
| ejaculatory bulb-specific protein 3                                                | 125         | 1.37E-66  | 71655.8 |
| NA                                                                                 | 103         |           | 60403   |
| REDICTED: LOW QUALITY PROTEIN: uncharacterized protein LOC108577999                | 113         | 5.82E-07  | 42531.2 |
| REDICTED: uncharacterized protein LOC108691125                                     | 112         | 1.78E-42  | 29237.4 |
| circadian clock-controlled protein-like                                            | 104         | 1.39E-39  | 22754.8 |
| circadian clock-controlled protein-like                                            | 250         | 1.75E-121 | 21481.7 |
| NA                                                                                 | 137         |           | 15361.2 |
| NA                                                                                 | 137         |           | 15361.2 |
| ejaculatory bulb-specific protein 3-like                                           | 128         | 8.16E-63  | 12043.5 |
| troponin C, isoform 1-like isoform X2                                              | 153         | 1.98E-102 | 9197.34 |
| Arginine kinase                                                                    | 355         | 0         | 7674.27 |
| REDICTED: uncharacterized protein LOC108691125                                     | 111         | 5.91E-62  | 7170.48 |
| NA                                                                                 | 137         |           | 6795.39 |
| troponin I isoform X5                                                              | 206         | 4.69E-95  | 6155.26 |
| paramyosin, long form                                                              | 877         | 0         | 5390.28 |
| myosin light chain alkali isoform X2                                               | 152         | 1.01E-87  | 4188.18 |
| DP/ATP translocase                                                                 | 300         | 0         | 4146.41 |
| NA                                                                                 | 286         |           | 3884.58 |
| myosin heavy chain, muscle                                                         | 1428        | 0         | 3870.17 |
| ropinin T isoform X8                                                               | 287         | 1.81E-122 | 3383.11 |
| uncharacterized abhydrolase domain-containing protein DDB_G0269086-like isoform X3 | 503         | 8.98E-26  | 3150.27 |
| actin, clone 205-like isoform X1                                                   | 294         | 0         | 2810.13 |
| myosin type-2 heavy chain 2-like                                                   | 133         | 1.87E-34  | 2727.44 |
| ropomyosin-1                                                                       | 284         | 0         | 2673.92 |
| myophilin                                                                          | 169         | 2.17E-118 | 2610.04 |
| cathepsin L                                                                        | 113         | 3.66E-36  | 2482.56 |
| cavenger receptor class B member 1                                                 | 539         | 0         | 2416.73 |
| putative beta-carotene-binding protein                                             | 242         | 8.24E-76  | 2393.76 |
| NA                                                                                 | 158         |           | 2161.15 |
| REDICTED: uncharacterized protein LOC106790187                                     | 117         | 1.71E-46  | 2161    |
| lpha-tocopherol transfer protein-like isoform X2                                   | 257         | 8.58E-155 | 2142.27 |
| protein NPC2 homolog                                                               | 154         | 1.89E-60  | 2138.37 |
| leucine-rich repeat extensin-like protein 5                                        | 207         | 6.09E-78  | 2084.03 |
| icarapin-like                                                                      | 227         | 3.58E-58  | 2080.75 |
| polyubiquitin-B                                                                    | 232         | 2.77E-165 | 2063.9  |
| NA                                                                                 | 105         |           | 2019    |
| ncharacterized protein LOC112588553                                                | 129         | 3.52E-40  | 1944.27 |
| heat shock protein beta-1 isoform X2                                               | 189         | 6.35E-117 | 1918.84 |
| NA                                                                                 | 120         |           | 1879.48 |
| ADH dehydrogenase subunit 4 (mitochondrion)                                        | 112         | 2.09E-17  | 1852.74 |
| cytochrome c oxidase subunit 5B, mitochondrial-like                                | 120         | 1.54E-71  | 1812.25 |
| fructose-bisphosphate aldolase-like                                                | 365         | 0         | 1796.07 |
| fructose-bisphosphate aldolase-like                                                | 365         | 0         | 1796.07 |
| REDICTED: uncharacterized protein LOC106785313 isoform X2                          | 120         | 1.99E-81  | 1722.14 |
| REDICTED: uncharacterized protein LOC106785313 isoform X2                          | 120         | 1.99E-81  | 1722.14 |
| REDICTED: uncharacterized protein LOC106785313 isoform X2                          | 120         | 1.99E-81  | 1722.14 |
| REDICTED: uncharacterized protein LOC106785313 isoform X2                          | 120         | 1.99E-81  | 1722.14 |
| actin, clone 205-like isoform X1                                                   | 294         | 0         | 1671.34 |
| ATP synthase lipid-binding protein, mitochondrial                                  | 137         | 1.38E-39  | 1585.69 |
| tropomyosin isoform X11                                                            | 283         | 1.32E-145 | 1541.22 |
| four and a half LIM domains protein 2 isoform X8                                   | 397         | 0         | 1501.53 |
| NA                                                                                 | 156         |           | 1466.24 |
| iron-sulfur cluster assembly enzyme ISCU, mitochondrial isoform X2                 | 166         | 2.20E-106 | 1372.9  |
| REDICTED: uncharacterized protein LOC106787607                                     | 419         | 0         | 1340.55 |
| REDICTED: uncharacterized protein LOC106787274                                     | 143         | 1.74E-18  | 1322.24 |
| lyceraldehyde-3-phosphate dehydrogenase 1                                          | 333         | 0         | 1281.02 |

|                                                                                |      |           |         |
|--------------------------------------------------------------------------------|------|-----------|---------|
| 60S acidic ribosomal protein P1 isoform X1                                     | 113  | 3.38E-38  | 1250.25 |
| NA                                                                             | 111  |           | 1205.95 |
| gamma-aminobutyric acid receptor-associated protein                            | 117  | 4.44E-82  | 1192.03 |
| ATPase inhibitor mai-2, mitochondrial-like                                     | 104  | 2.32E-40  | 1189.36 |
| cAMP-responsive element-binding protein-like 2                                 | 119  | 7.71E-59  | 1174.9  |
| muscle LIM protein 1-like isoform X3                                           | 248  | 2.19E-108 | 1157.47 |
| myosin regulatory light chain 2                                                | 214  | 4.88E-103 | 1157.45 |
| myosin regulatory light chain 2                                                | 214  | 4.88E-103 | 1157.45 |
| myosin regulatory light chain 2                                                | 214  | 4.88E-103 | 1157.45 |
| myosin regulatory light chain 2                                                | 214  | 4.88E-103 | 1157.45 |
| NA                                                                             | 130  |           | 1149.21 |
| NA                                                                             | 107  |           | 1140.2  |
| troponin I isoform X2                                                          | 212  | 4.40E-88  | 1114.17 |
| heat shock 70 kDa protein cognate 4                                            | 650  | 0         | 1112.72 |
| ranslation elongation factor 2                                                 | 857  | 0         | 1087.94 |
| 4-3-3 protein zeta isoform X1                                                  | 247  | 1.36E-169 | 1066.49 |
| glutamine synthetase 2 cytoplasmic                                             | 405  | 0         | 1057.76 |
| calcium-transporting ATPase sarcoplasmic/endoplasmic reticulum type isoform X3 | 1002 | 0         | 1023.63 |
| calcium-transporting ATPase sarcoplasmic/endoplasmic reticulum type isoform X3 | 1002 | 0         | 1023.63 |
| REDICTED: uncharacterized protein LOC106791603 isoform X2                      | 150  | 3.10E-83  | 1018.4  |
| alpha-tocopherol transfer protein-like isoform X1                              | 128  | 7.60E-30  | 1017.26 |
| polyadenylate-binding protein 1                                                | 630  | 0         | 1001.44 |
| filamin-A-like                                                                 | 364  | 0         | 966.368 |
| glycerol-3-phosphate dehydrogenase, mitochondrial isoform X1                   | 719  | 0         | 949.545 |
| lpha-tocopherol transfer protein-like isoform X2                               | 300  | 0         | 944.777 |
| lpha-tocopherol transfer protein-like isoform X2                               | 300  | 0         | 944.777 |
| henoloxidase-activating factor 2 isoform X1                                    | 120  | 3.02E-26  | 944.135 |
| translationally-controlled tumor protein homolog                               | 172  | 8.20E-106 | 928.534 |
| translationally-controlled tumor protein homolog                               | 172  | 8.20E-106 | 928.534 |
| elongation factor 1-alpha-like                                                 | 462  | 0         | 922.267 |
| uscle LIM protein Mlp84B isoform X2                                            | 493  | 0         | 912.828 |
| probable Bax inhibitor 1                                                       | 237  | 2.04E-136 | 908.641 |
| activating transcription factor of chaperone                                   | 367  | 5.99E-159 | 908.023 |
| NADH dehydrogenase [ubiquinone] 1 alpha subcomplex subunit 6                   | 123  | 5.99E-66  | 904.946 |
| troponin T, skeletal muscle isoform X5                                         | 356  | 1.90E-153 | 904.143 |
| 40S ribosomal protein S24                                                      | 133  | 2.17E-69  | 902.085 |
| cytochrome c oxidase subunit NDUFA4                                            | 143  | 2.00E-36  | 887.371 |
| NADH-ubiquinone oxidoreductase 49 kDa subunit-like                             | 468  | 0         | 886.52  |
| muscle-specific protein 20                                                     | 184  | 2.14E-131 | 880.847 |
| ATP-dependent RNA helicase p62-like isoform X1                                 | 431  | 0         | 877.98  |
| REDICTED: uncharacterized protein LOC106793063                                 | 193  | 5.50E-74  | 865.288 |
| succinate dehydrogenase [ubiquinone] iron-sulfur subunit, mitochondrial-like   | 280  | 0         | 863.137 |
| peroxisomal hydratase-dehydrogenase-epimerase-like                             | 263  | 2.08E-121 | 857.585 |

**Table S11.** Annotation of top 100 highly expressed genes in the venom gland of *Sceliphron deforme*.

| Putative venom protein/peptide                             | Length (aa) | E-value     | TPM     |
|------------------------------------------------------------|-------------|-------------|---------|
| neural/ectodermal development factor IMP-L2                | 299         | 3.0879E-99  | 52188.9 |
| PREDICTED: uncharacterized protein LOC108729897            | 127         | 2.25273E-12 | 48220   |
| PREDICTED: uncharacterized protein LOC108729897            | 127         | 2.25273E-12 | 48220   |
| NA                                                         | 170         |             | 48220   |
| NA                                                         | 124         |             | 48220   |
| venom acid phosphatase Acph-1-like isoform X1              | 384         | 8.5473E-160 | 39252.3 |
| NA                                                         | 104         |             | 39144.5 |
| NA                                                         | 234         |             | 25249.4 |
| endothelin-converting enzyme 1-like isoform X2             | 136         | 2.93187E-16 | 16846.1 |
| NA                                                         | 118         |             | 15881.2 |
| NA                                                         | 118         |             | 15881.2 |
| NA                                                         | 118         |             | 15881.2 |
| NA                                                         | 161         |             | 13676.1 |
| probable serine/threonine-protein kinase DDB_G0282963      | 134         | 3.03299E-20 | 12757.8 |
| MAGUK p55 subfamily member 6 isoform X1                    | 602         | 0           | 9351.47 |
| NA                                                         | 192         |             | 9351.47 |
| MAGUK p55 subfamily member 6 isoform X1                    | 602         | 0           | 9351.47 |
| venom acid phosphatase Acph-1-like isoform X1              | 197         | 1.74681E-63 | 8875.85 |
| PREDICTED: uncharacterized protein LOC108555132 isoform X1 | 108         | 1.22989E-17 | 8703.35 |
| C2 domain-containing protein 5-like isoform X5             | 441         | 0           | 8355.46 |
| membrane metallo-endopeptidase-like 1                      | 253         | 4.54588E-21 | 6167.2  |
| neprilysin-4                                               | 392         | 2.30117E-45 | 5713.35 |
| neprilysin-4                                               | 708         | 7.99094E-74 | 5333.2  |
| neprilysin-4                                               | 138         | 4.69959E-13 | 5070.86 |
| C2 domain-containing protein 5-like isoform X5             | 441         | 0           | 4930.89 |
| C2 domain-containing protein 5                             | 1053        | 0           | 4930.89 |
| C2 domain-containing protein 5                             | 1053        | 0           | 4930.89 |
| histidine decarboxylase                                    | 206         | 2.339E-115  | 4492.63 |
| CAPA peptides-like                                         | 362         | 1.87447E-05 | 4491.06 |
| NA                                                         | 105         |             | 4233.02 |
| glucose dehydrogenase [FAD, quinone]-like                  | 616         | 0           | 3783.38 |
| NA                                                         | 102         |             | 3773.29 |
| neprilysin-like isoform X2                                 | 137         | 2.84624E-13 | 3349.66 |
| membrane metallo-endopeptidase-like 1                      | 187         | 7.59906E-29 | 3029.67 |
| glucose dehydrogenase [FAD, quinone]                       | 237         | 3.73384E-73 | 2817.55 |
| NA                                                         | 188         |             | 2630.57 |
| NA                                                         | 339         |             | 2630.57 |
| NA                                                         | 261         |             | 2630.57 |
| NA                                                         | 186         |             | 2630.57 |
| NA                                                         | 339         |             | 2630.57 |
| NA                                                         | 101         |             | 2630.57 |
| death-associated protein 1                                 | 102         | 2.52883E-61 | 2502.01 |
| PREDICTED: uncharacterized protein LOC108553804            | 301         | 3.1033E-113 | 2298.88 |
| calreticulin                                               | 403         | 0           | 2068.53 |
| NA                                                         | 164         |             | 2040.35 |
| NA                                                         | 117         |             | 1902.61 |
| neprilysin-4                                               | 707         | 2.40541E-77 | 1894.93 |
| neprilysin-4                                               | 540         | 1.75637E-57 | 1738.36 |
| neprilysin-2-like                                          | 122         | 7.6461E-07  | 1654.21 |
| PREDICTED: uncharacterized protein LOC100881064            | 132         | 3.21775E-59 | 1586.51 |
| neprilysin-like isoform X2                                 | 123         | 7.58499E-10 | 1550.89 |
| protein disulfide-isomerase                                | 504         | 0           | 1538.15 |
| PREDICTED: uncharacterized protein LOC107187631            | 225         | 1.87858E-23 | 1538.15 |
| membrane metallo-endopeptidase-like 1                      | 168         | 6.95225E-20 | 1451.48 |
| membrane metallo-endopeptidase-like 1                      | 150         | 3.34105E-21 | 1435.2  |
| neprilysin-4                                               | 572         | 6.89348E-50 | 1435.2  |
| neprilysin-4 isoform X2                                    | 140         | 1.10265E-10 | 1394.74 |
| PHD finger protein 20 isoform X2                           | 1392        | 0           | 1387.61 |

|                                                           |     |             |         |
|-----------------------------------------------------------|-----|-------------|---------|
| NA                                                        | 133 |             | 1361.48 |
| endothelin-converting enzyme 1                            | 131 | 6.45751E-08 | 1349.09 |
| NA                                                        | 152 |             | 1339.18 |
| 60S acidic ribosomal protein P2                           | 113 | 3.67988E-37 | 1267.48 |
| neprilysin-4                                              | 392 | 2.30117E-45 | 1265.5  |
| neprilysin-4                                              | 203 | 1.16279E-32 | 1265.5  |
| heat shock 70 kDa protein cognate 3                       | 656 | 0           | 1247.21 |
| heat shock 70 kDa protein cognate 3                       | 656 | 0           | 1247.21 |
| NA                                                        | 114 |             | 1209.18 |
| neprilysin-like isoform X1                                | 132 | 5.70826E-20 | 1179.24 |
| NA                                                        | 130 |             | 1166.55 |
| NA                                                        | 186 |             | 1155    |
| NA                                                        | 186 |             | 1155    |
| NA                                                        | 339 |             | 1155    |
| NA                                                        | 101 |             | 1155    |
| PREDICTED: uncharacterized protein LOC107185637           | 477 | 0           | 1155    |
| NA                                                        | 261 |             | 1155    |
| PREDICTED: uncharacterized protein LOC107185637           | 477 | 0           | 1155    |
| NA                                                        | 261 |             | 1155    |
| NA                                                        | 339 |             | 1155    |
| uncharacterized protein LOC105666132                      | 118 | 1.90938E-28 | 1140.95 |
| teasome subunit beta type-2                               | 207 | 1.6514E-136 | 1136.26 |
| translationally-controlled tumor protein homolog          | 173 | 3.0197E-103 | 1116.7  |
| PREDICTED: uncharacterized protein LOC100865315           | 102 | 9.53299E-50 | 1114.2  |
| endothelin-converting enzyme 1 isoform X2                 | 188 | 1.25392E-14 | 1073.77 |
| NA                                                        | 158 |             | 1049.55 |
| NA                                                        | 196 |             | 1049.55 |
| NA                                                        | 158 |             | 1049.55 |
| endothelin-converting enzyme 1 isoform X1                 | 225 | 1.53327E-18 | 1025.81 |
| 40S ribosomal protein S20                                 | 121 | 1.45085E-82 | 1008.57 |
| NA                                                        | 113 |             | 1007.37 |
| cAMP-responsive element-binding protein-like 2 isoform X2 | 119 | 6.5382E-59  | 983.368 |
| endothelin-converting enzyme 1 isoform X1                 | 247 | 2.03091E-26 | 957.137 |
| endoplasmic                                               | 800 | 0           | 888.071 |
| endothelin-converting enzyme 1                            | 145 | 9.82295E-07 | 880.543 |
| PREDICTED: uncharacterized protein LOC100881997           | 166 | 5.582E-113  | 871.591 |
| neprilysin-like                                           | 541 | 1.57794E-52 | 871.005 |
| 40S ribosomal protein S3a-like                            | 267 | 7.4299E-166 | 869.767 |
| endothelin-converting enzyme 1                            | 118 | 1.57129E-06 | 853.558 |
| NA                                                        | 339 |             | 844.701 |
| uncharacterized protein LOC725241 isoform X3              | 863 | 0           | 844.701 |
| uncharacterized protein LOC725241 isoform X3              | 863 | 0           | 844.701 |

**Table S12.** Annotation of top 100 highly expressed genes in the venom gland of *Bombus ardens*.

| Putative venom protein/peptide                                   | Length (aa) | E-value     | TPM     |
|------------------------------------------------------------------|-------------|-------------|---------|
| ejaculatory bulb-specific protein 3                              | 100         | 8.59474E-58 | 112009  |
| 60S ribosomal protein L44 isoform X2                             | 104         | 6.99126E-59 | 7273.83 |
| omega-conotoxin-like protein 1                                   | 100         | 1.37925E-39 | 7234.29 |
| uncharacterized protein PF11_0213                                | 295         | 7.6278E-162 | 6802.27 |
| ejaculatory bulb-specific protein 3                              | 116         | 8.2804E-80  | 6456.8  |
| NA                                                               | 195         |             | 5928.69 |
| 60S ribosomal protein L36                                        | 115         | 1.44569E-77 | 5129.55 |
| 60S acidic ribosomal protein P1                                  | 111         | 1.63922E-47 | 4955.26 |
| protein lethal(2)essential for life                              | 137         | 3.74392E-57 | 4587.67 |
| hydroxymethylglutaryl-CoA synthase 1                             | 453         | 0           | 4015.31 |
| NA                                                               | 105         |             | 4015.31 |
| hydroxymethylglutaryl-CoA synthase 1                             | 453         | 0           | 4015.31 |
| isopentenyl-diphosphate Delta-isomerase 1                        | 241         | 1.9222E-172 | 3834.15 |
| uncharacterized protein LOC100745189                             | 99          | 1.88266E-59 | 3494.51 |
| uncharacterized protein LOC105681061 isoform X2                  | 96          | 4.36007E-35 | 3375.59 |
| protein translation factor SUI1 homolog                          | 110         | 1.11081E-78 | 3340.62 |
| acyl-CoA Delta(11) desaturase isoform X4                         | 351         | 0           | 3298.59 |
| coiled-coil-helix-coiled-coil-helix domain-containing protein 10 | 142         | 2.73484E-48 | 3156.71 |
| polyubiquitin-B                                                  | 163         | 2.2526E-113 | 3137.15 |
| NA                                                               | 103         |             | 3022.84 |
| NA                                                               | 120         |             | 2943.36 |
| NA                                                               | 99          |             | 2912.03 |
| formin-like protein CG32138 isoform X4                           | 716         | 0           | 2890.72 |
| 60S acidic ribosomal protein P2                                  | 114         | 9.53553E-39 | 2730.64 |
| formin-like protein CG32138 isoform X4                           | 716         | 0           | 2690.67 |
| 40S ribosomal protein S26 isoform X1                             | 114         | 1.81523E-79 | 2690.3  |
| ecdysteroid-regulated 16 kDa protein                             | 156         | 5.66734E-83 | 2598.96 |
| 40S ribosomal protein S23-like                                   | 143         | 1.3693E-101 | 2550.75 |
| 40S ribosomal protein S17-like                                   | 131         | 1.15688E-93 | 2549.74 |
| protein APCDD1-like                                              | 444         | 0           | 2515.02 |
| 40S ribosomal protein S25                                        | 119         | 2.7424E-50  | 2415.31 |
| farnesol dehydrogenase                                           | 251         | 1.1068E-153 | 2360.59 |
| thioredoxin-2                                                    | 105         | 3.51002E-73 | 2326.23 |
| profilin                                                         | 126         | 8.04157E-90 | 2306.51 |
| uncharacterized protein LOC100644161                             | 123         | 6.4862E-26  | 2099.92 |
| icarapin-like                                                    | 135         | 1.01974E-74 | 2039.12 |
| 14-3-3 protein zeta-like isoform X1                              | 156         | 2.47619E-97 | 2027.93 |
| icarapin-like                                                    | 230         | 4.2435E-134 | 2012.05 |
| calmodulin-like                                                  | 149         | 4.5592E-104 | 2007.58 |
| SET and MYND domain-containing protein DDB_G0273589              | 183         | 7.10985E-70 | 1980.12 |
| NA                                                               | 248         |             | 1980.12 |
| NA                                                               | 248         |             | 1980.12 |
| 60S ribosomal protein L35                                        | 123         | 6.40636E-64 | 1959.54 |
| uncharacterized protein LOC100749740                             | 244         | 0           | 1872.15 |
| NA                                                               | 136         |             | 1858.79 |
| NA                                                               | 101         |             | 1825.65 |
| uncharacterized protein LOC100644176 isoform X1                  | 140         | 3.89853E-88 | 1799.96 |
| uncharacterized protein LOC100644176 isoform X1                  | 140         | 3.89853E-88 | 1799.96 |
| embryonic polarity protein dorsal isoform X2                     | 599         | 0           | 1796.69 |
| embryonic polarity protein dorsal isoform X2                     | 624         | 0           | 1796.69 |
| apoptosis-resistant E3 ubiquitin protein ligase 1 isoform X1     | 951         | 0           | 1796.69 |
| heterogeneous nuclear ribonucleoprotein A1 isoform X2            | 320         | 1.2252E-110 | 1755.6  |
| Na(+)/H(+) exchange regulatory cofactor NHE-RF1                  | 115         | 1.30675E-37 | 1743.41 |
| 40S ribosomal protein S15Aa-like isoform X1                      | 127         | 1.22E-89    | 1738.69 |
| 40S ribosomal protein S12                                        | 141         | 2.3573E-100 | 1735.21 |
| ATP synthase lipid-binding protein, mitochondrial                | 144         | 1.40492E-53 | 1719.03 |
| NA                                                               | 177         |             | 1719.01 |
| uncharacterized protein LOC113219351                             | 130         | 5.64173E-14 | 1660.21 |

|                                                             |     |             |         |
|-------------------------------------------------------------|-----|-------------|---------|
| 60S ribosomal protein L30-like                              | 114 | 3.03211E-80 | 1656.65 |
| 60S ribosomal protein L27                                   | 134 | 1.05114E-94 | 1655.22 |
| NA                                                          | 99  |             | 1608.05 |
| NA                                                          | 123 |             | 1575.57 |
| ubiquitin-60S ribosomal protein L40-like isoform X1         | 128 | 5.68352E-91 | 1572.18 |
| 40S ribosomal protein S20-like                              | 121 | 5.81772E-84 | 1569.79 |
| trithorax group protein osa                                 | 116 | 7.29131E-54 | 1533.07 |
| elongation factor 1-alpha                                   | 461 | 0           | 1523    |
| elongation factor 1-alpha                                   | 461 | 0           | 1523    |
| NA                                                          | 134 |             | 1469.13 |
| RNA-directed DNA polymerase from mobile element jockey-like | 99  | 7.55869E-34 | 1447.64 |
| 60S ribosomal protein L14                                   | 149 | 6.61887E-92 | 1419.77 |
| small integral membrane protein 14                          | 106 | 3.15243E-63 | 1414.75 |
| cGMP-dependent 3',5'-cyclic phosphodiesterase isoform X2    | 101 | 9.49078E-55 | 1393.84 |
| 40S ribosomal protein S10                                   | 159 | 3.95312E-83 | 1385.98 |
| gamma-aminobutyric acid receptor-associated protein-like    | 117 | 3.8084E-82  | 1370.67 |
| four and a half LIM domains protein 2 isoform X8            | 102 | 2.29244E-13 | 1359.97 |
| NA                                                          | 102 |             | 1353.49 |
| death-associated protein 1                                  | 102 | 2.2461E-68  | 1353.49 |
| 40S ribosomal protein S24                                   | 132 | 3.922E-81   | 1350.84 |
| 14-3-3 protein zeta isoform X2                              | 114 | 1.2771E-73  | 1323.18 |
| NA                                                          | 191 |             | 1317.33 |
| 40S ribosomal protein S9 isoform X2                         | 138 | 1.20252E-94 | 1317.28 |
| protein lethal(2)essential for life                         | 173 | 4.6401E-126 | 1316.41 |
| NA                                                          | 100 |             | 1292.66 |
| 10 kDa heat shock protein, mitochondrial                    | 104 | 1.10131E-69 | 1262.92 |
| heat shock 70 kDa protein cognate 4                         | 646 | 0           | 1228.82 |
| NA                                                          | 104 |             | 1214.83 |
| 40S ribosomal protein S8                                    | 208 | 1.0331E-132 | 1205.13 |
| 40S ribosomal protein S16                                   | 148 | 1.5437E-103 | 1204.82 |
| 60S ribosomal protein L31                                   | 148 | 1.01464E-68 | 1180.52 |
| uncharacterized protein LOC100642642                        | 169 | 1.778E-124  | 1176.12 |
| defensin-1                                                  | 158 | 5.09188E-91 | 1163.46 |
| NA                                                          | 103 |             | 1148.43 |
| 60S ribosomal protein L8                                    | 257 | 7.7442E-176 | 1123.52 |
| serine-arginine protein 55 isoform X13                      | 145 | 1.23313E-83 | 1104.5  |
| NA                                                          | 108 |             | 1079.25 |
| NA                                                          | 105 |             | 1000.55 |
| polyubiquitin                                               | 119 | 1.40968E-52 | 987.363 |
| 40S ribosomal protein S15-like                              | 147 | 1.76236E-92 | 984.901 |
| NA                                                          | 124 |             | 978.588 |
| 60S ribosomal protein L11 isoform X1                        | 191 | 1.1922E-126 | 970.792 |

**Table S13.** Annotation of top 100 highly expressed genes in the venom gland of *Bombus consobrinus*.

| Putative venom protein/peptide                                   | Length (aa) | E-value   | TPM     |
|------------------------------------------------------------------|-------------|-----------|---------|
| ejaculatory bulb-specific protein 3 isoform X2                   | 181         | 7.27E-57  | 44088.4 |
| elongation of very long chain fatty acids protein 6-like         | 109         | 1.78E-59  | 13702.2 |
| 60S acidic ribosomal protein P1                                  | 111         | 3.03E-52  | 11502.7 |
| coiled-coil-helix-coiled-coil-helix domain-containing protein 10 | 142         | 3.35E-47  | 9201.64 |
| ejaculatory bulb-specific protein 3 isoform X2                   | 206         | 7.45E-85  | 8887.83 |
| 60S acidic ribosomal protein P2                                  | 114         | 9.54E-39  | 8555.36 |
| 40S ribosomal protein S17-like                                   | 131         | 1.16E-93  | 8086.35 |
| uncharacterized protein LOC113219351                             | 244         | 7.52E-92  | 7944.94 |
| ecdysteroid-regulated 16 kDa protein                             | 156         | 2.26E-83  | 7869.22 |
| heat shock 70 kDa protein cognate 4                              | 646         | 0         | 7683.65 |
| uncharacterized protein LOC105680602                             | 106         | 4.71E-73  | 6955.11 |
| 60S ribosomal protein L30-like                                   | 114         | 3.03E-80  | 6534.1  |
| 60S ribosomal protein L36                                        | 115         | 2.82E-78  | 6526.81 |
| 40S ribosomal protein S24                                        | 132         | 3.92E-81  | 5809.66 |
| acyl-CoA Delta(11) desaturase isoform X4                         | 163         | 3.66E-103 | 5688.97 |
| acyl-CoA Delta(11) desaturase isoform X4<br>NA                   | 163         | 3.66E-103 | 5688.97 |
| 40S ribosomal protein S15Aa-like isoform X1                      | 105         |           | 5372.74 |
| 40S ribosomal protein S15Aa-like isoform X1                      | 130         | 3.37E-92  | 4897.34 |
| 2-acylglycerol O-acyltransferase 1                               | 348         | 0         | 4845.65 |
| icarapin-like                                                    | 265         | 5.85E-125 | 4623.14 |
| 40S ribosomal protein S20-like                                   | 121         | 5.82E-84  | 4535.15 |
| 40S ribosomal protein S26 isoform X1                             | 114         | 1.82E-79  | 4491.54 |
| protein translation factor SU11 homolog                          | 110         | 1.11E-78  | 4419.41 |
| 40S ribosomal protein S12                                        | 141         | 1.15E-99  | 4374.9  |
| ATP synthase subunit g, mitochondrial                            | 99          | 3.86E-63  | 4097.42 |
| 40S ribosomal protein S8                                         | 208         | 2.18E-132 | 3902.96 |
| microsomal glutathione S-transferase 1                           | 150         | 6.17E-100 | 3892.81 |
| 40S ribosomal protein S18-like                                   | 152         | 5.10E-94  | 3869.92 |
| farnesol dehydrogenase                                           | 264         | 4.54E-153 | 3843.13 |
| farnesol dehydrogenase                                           | 264         | 4.54E-153 | 3843.13 |
| 40S ribosomal protein S3-like                                    | 242         | 3.26E-178 | 3785.39 |
| ATPase inhibitor mai-2, mitochondrial                            | 103         | 2.01E-46  | 3766.32 |
| 40S ribosomal protein S13-like                                   | 151         | 1.83E-108 | 3624.08 |
| 40S ribosomal protein S11                                        | 155         | 2.83E-88  | 3616.81 |
| ubiquitin-like                                                   | 109         | 4.33E-74  | 3522.77 |
| ubiquitin-40S ribosomal protein S27a                             | 156         | 2.36E-83  | 3450.36 |
| 60S ribosomal protein L32                                        | 134         | 3.18E-95  | 3399.41 |
| cytochrome b-c1 complex subunit 8                                | 109         | 1.58E-52  | 3205.92 |
| 60S ribosomal protein L31                                        | 123         | 5.22E-71  | 3150.06 |
| 60S ribosomal protein L31                                        | 123         | 5.22E-71  | 3150.06 |
| 60S ribosomal protein L31                                        | 123         | 5.22E-71  | 3150.06 |
| 60S ribosomal protein L9 isoform X2                              | 190         | 3.77E-139 | 3130.64 |
| 40S ribosomal protein S2                                         | 284         | 5.18E-166 | 3129.93 |
| 40S ribosomal protein S19                                        | 154         | 2.90E-95  | 3127.25 |
| 40S ribosomal protein S4 isoform X1                              | 262         | 0         | 3118.61 |
| 40S ribosomal protein S3a-like                                   | 267         | 3.93E-172 | 2855.04 |
| elongation factor 1-alpha                                        | 461         | 0         | 2852.75 |
| NA                                                               | 101         |           | 2777.73 |
| 60S ribosomal protein L17                                        | 185         | 1.74E-122 | 2733.3  |
| 60S ribosomal protein L35                                        | 123         | 5.25E-66  | 2706.99 |
| 60S ribosomal protein L26                                        | 121         | 9.13E-56  | 2631.13 |
| 60S ribosomal protein L35a                                       | 146         | 6.31E-82  | 2485.6  |
| 40S ribosomal protein S5-like isoform X1                         | 216         | 2.80E-157 | 2454.9  |
| glutathione S-transferase                                        | 201         | 8.84E-146 | 2449.13 |
| enolase                                                          | 107         | 7.90E-72  | 2325.18 |
| gamma-aminobutyric acid receptor-associated protein-like         | 117         | 3.81E-82  | 2243.34 |
| 60S ribosomal protein L21                                        | 183         | 1.51E-111 | 2221.87 |
| 60S ribosomal protein L24                                        | 154         | 3.37E-62  | 2211.5  |



|                                                      |     |           |         |
|------------------------------------------------------|-----|-----------|---------|
| polyubiquitin-B                                      | 229 | 5.76E-164 | 2208.19 |
| 40S ribosomal protein SA                             | 309 | 0         | 2174.23 |
| CD63 antigen isoform X2                              | 103 | 2.32E-53  | 2165.92 |
| 60S ribosomal protein L23a                           | 241 | 2.78E-96  | 2153.22 |
| 40S ribosomal protein S16                            | 148 | 1.54E-103 | 2131.83 |
| apidaecins type 73 isoform X2                        | 104 | 3.88E-14  | 2121.97 |
| 60S ribosomal protein L8                             | 257 | 7.74E-176 | 2102.15 |
| ubiquitin-60S ribosomal protein L40-like isoform X1  | 128 | 5.68E-91  | 2072.61 |
| ubiquitin-60S ribosomal protein L40-like isoform X1  | 128 | 5.68E-91  | 2072.61 |
| superoxide dismutase [Cu-Zn], chloroplatic           | 176 | 6.26E-118 | 2028.76 |
| 60S ribosomal protein L27                            | 134 | 1.05E-94  | 1973.83 |
| 60S ribosomal protein L27                            | 134 | 1.05E-94  | 1973.83 |
| 40S ribosomal protein S15-like                       | 147 | 1.76E-92  | 1926.45 |
| uncharacterized protein LOC100650183                 | 453 | 0         | 1923.12 |
| cytochrome b-c1 complex subunit 7                    | 109 | 4.05E-63  | 1896.99 |
| acetyl-CoA acetyltransferase, cytosolic              | 275 | 0         | 1894.62 |
| nucleoside diphosphate kinase                        | 154 | 1.20E-109 | 1892.4  |
| 60S ribosomal protein L10a                           | 217 | 1.94E-144 | 1865.18 |
| 40S ribosomal protein S9-like                        | 193 | 3.78E-137 | 1839.88 |
| 60S ribosomal protein L13a-like                      | 204 | 1.03E-149 | 1829.83 |
| aquaporin AQPAn.G isoform X2                         | 109 | 4.46E-74  | 1813.83 |
| uncharacterized protein LOC100742137 isoform X1      | 167 | 1.93E-123 | 1805.05 |
| 40S ribosomal protein S10                            | 159 | 5.65E-96  | 1801.3  |
| 40S ribosomal protein S10                            | 159 | 5.65E-96  | 1801.3  |
| 60S ribosomal protein L13                            | 219 | 2.95E-152 | 1799.4  |
| elongation of very long chain fatty acids protein 6  | 275 | 0         | 1774.65 |
| ferritin-3, chloroplatic                             | 225 | 1.73E-165 | 1750.22 |
| reticulon-1-A isoform X6                             | 117 | 8.14E-79  | 1712.28 |
| nose resistant to fluoxetine protein 6               | 114 | 1.01E-36  | 1708.8  |
| cytochrome c oxidase subunit 6A1, mitochondrial-like | 112 | 4.76E-69  | 1707.98 |
| glyceraldehyde-3-phosphate dehydrogenase 2           | 128 | 3.27E-71  | 1679.48 |
| 60S ribosomal protein L19-like                       | 200 | 2.07E-124 | 1656.21 |
| uncharacterized protein LOC100745189                 | 132 | 1.70E-82  | 1638.94 |
| hydroxymethylglutaryl-CoA synthase 1                 | 453 | 0         | 1627.22 |
| hydroxymethylglutaryl-CoA synthase 1                 | 453 | 0         | 1627.22 |
| hydroxymethylglutaryl-CoA synthase 1                 | 453 | 0         | 1627.22 |
| hydroxymethylglutaryl-CoA synthase 1                 | 453 | 0         | 1627.22 |
| 60S ribosomal protein L4                             | 434 | 0         | 1614.61 |
| myelin P2 protein isoform X2                         | 132 | 1.68E-92  | 1555.04 |
| myelin P2 protein isoform X2                         | 132 | 1.68E-92  | 1555.04 |
| myelin P2 protein isoform X2                         | 132 | 1.68E-92  | 1555.04 |
| very-long-chain enoyl-CoA reductase                  | 300 | 0         | 1550.35 |

**Table S14.** Annotation of top 100 highly expressed genes in the venom gland of *Bombus ussurensis*.

| Putative venom protein/peptide                                   | Length (aa) | E-value     | TPM     |
|------------------------------------------------------------------|-------------|-------------|---------|
| uncharacterized protein LOC105681061 isoform X2                  | 103         | 6.71623E-29 | 18373.6 |
| farnesol dehydrogenase                                           | 123         | 6.12275E-65 | 11840.2 |
| ejaculatory bulb-specific protein 3 isoform X1                   | 125         | 1.17987E-82 | 9576.21 |
| heat shock 70 kDa protein cognate 4                              | 646         | 0           | 8631    |
| glutathione S-transferase                                        | 111         | 8.41342E-69 | 7578.26 |
| icarapin-like                                                    | 241         | 3.6009E-126 | 6943.3  |
| omega-conotoxin-like protein 1                                   | 100         | 2.02743E-38 | 6744.55 |
| coiled-coil-helix-coiled-coil-helix domain-containing protein 10 | 142         | 2.82107E-46 | 6741.51 |
| NA                                                               | 104         |             | 6196.83 |
| acyl-CoA Delta(11) desaturase isoform X4                         | 163         | 2.1297E-118 | 5306.83 |
| 60S ribosomal protein L17                                        | 101         | 4.22728E-71 | 5114.04 |
| farnesol dehydrogenase                                           | 123         | 1.11866E-72 | 4950.47 |
| NA                                                               | 101         |             | 4653.28 |
| uncharacterized protein LOC105681061 isoform X2                  | 129         | 5.17499E-34 | 4634.01 |
| polyubiquitin                                                    | 103         | 2.22011E-69 | 4626.54 |
| elongation factor 1-alpha                                        | 461         | 0           | 4296.7  |
| ecdysteroid-regulated 16 kDa protein                             | 156         | 2.25633E-83 | 4132.73 |
| protein lethal(2)essential for life                              | 173         | 3.2588E-127 | 4080.28 |
| NA                                                               | 103         |             | 3606.31 |
| NA                                                               | 99          |             | 3361.47 |
| acyl-CoA Delta(11) desaturase isoform X2                         | 351         | 0           | 3236.66 |
| icarapin-like                                                    | 231         | 6.4083E-113 | 3118.95 |
| 2-acylglycerol O-acyltransferase 1-like                          | 220         | 9.2831E-120 | 3019.46 |
| elongation of very long chain fatty acids protein 6              | 288         | 0           | 2931.62 |
| 14-3-3 protein zeta isoform X1                                   | 106         | 7.126E-74   | 2917.18 |
| 40S ribosomal protein S17-like                                   | 131         | 1.15688E-93 | 2618.88 |
| uncharacterized protein LOC100644161                             | 123         | 8.86119E-28 | 2528.83 |
| farnesyl pyrophosphate synthase-like isoform X1                  | 106         | 1.11918E-66 | 2494.59 |
| gamma-aminobutyric acid receptor-associated protein-like         | 117         | 3.8084E-82  | 2407.79 |
| heat shock protein beta-1 isoform X2                             | 189         | 7.1374E-124 | 2325.31 |
| 60S ribosomal protein L30-like                                   | 114         | 3.03211E-80 | 2313.36 |
| 60S ribosomal protein L36                                        | 115         | 2.81645E-78 | 2216.85 |
| CD63 antigen isoform X1                                          | 234         | 5.986E-124  | 2196.9  |
| SPARC                                                            | 307         | 4.0824E-173 | 1997.69 |
| transferrin                                                      | 707         | 0           | 1908.42 |
| 40S ribosomal protein S26 isoform X1                             | 114         | 1.81523E-79 | 1863.12 |
| putative fatty acyl-CoA reductase CG5065                         | 282         | 3.2473E-164 | 1862.4  |
| translationally-controlled tumor protein homolog                 | 172         | 6.9976E-111 | 1856.09 |
| 2-acylglycerol O-acyltransferase 1                               | 348         | 0           | 1838.05 |
| fructose-bisphosphate aldolase isoform X2                        | 365         | 0           | 1746.69 |
| fructose-bisphosphate aldolase isoform X2                        | 365         | 0           | 1746.69 |
| uncharacterized protein LOC100644176 isoform X1                  | 140         | 3.85767E-73 | 1741.12 |
| ADP,ATP carrier protein 2                                        | 300         | 0           | 1739.24 |
| 40S ribosomal protein S2                                         | 284         | 1.6719E-165 | 1690.02 |
| 60S ribosomal protein L9 isoform X2                              | 190         | 3.7683E-139 | 1675.71 |
| small integral membrane protein 14                               | 106         | 2.37526E-62 | 1664.45 |
| LOW QUALITY PROTEIN: uncharacterized protein LOC105667095        | 310         | 0           | 1653.37 |
| superoxide dismutase [Cu-Zn]                                     | 151         | 1.7044E-106 | 1644.33 |
| NA                                                               | 120         |             | 1634.32 |
| probable phospholipid hydroperoxide glutathione peroxidase       | 131         | 1.90071E-92 | 1564.06 |
| LOW QUALITY PROTEIN: uncharacterized protein LOC110120277        | 120         | 6.66008E-49 | 1550.01 |
| LOW QUALITY PROTEIN: uncharacterized protein LOC110120277        | 120         | 6.66008E-49 | 1550.01 |
| uncharacterized protein LOC100742137 isoform X1                  | 167         | 1.9265E-123 | 1536.92 |
| protein translation factor SUI1 homolog                          | 110         | 1.11081E-78 | 1524.43 |
| icarapin-like                                                    | 135         | 2.30378E-75 | 1522.5  |
| peroxiredoxin 1                                                  | 195         | 1.9306E-144 | 1522.23 |
| neurofilament heavy polypeptide                                  | 474         | 1.12485E-86 | 1514.63 |
| ABC transporter G family member 20 isoform X1                    | 767         | 0           | 1503.88 |

|                                                           |     |             |         |
|-----------------------------------------------------------|-----|-------------|---------|
| actin-5C                                                  | 376 | 0           | 1499.81 |
| actin-5C                                                  | 376 | 0           | 1499.81 |
| cAMP-responsive element-binding protein-like 2 isoform X2 | 119 | 1.71162E-62 | 1494.78 |
| tubulin beta-1 chain-like                                 | 447 | 0           | 1491.54 |
| death-associated protein 1                                | 102 | 1.21452E-68 | 1480.85 |
| 14-3-3 protein zeta isoform X1                            | 247 | 0           | 1477.16 |
| elongation of very long chain fatty acids protein 6       | 275 | 0           | 1476.24 |
| elongation of very long chain fatty acids protein 6       | 275 | 0           | 1476.24 |
| 40S ribosomal protein S15Aa-like isoform X1               | 130 | 3.37052E-92 | 1454.84 |
| NA                                                        | 99  |             | 1454.7  |
| heat shock protein 83                                     | 725 | 0           | 1433.89 |
| cytochrome b-c1 complex subunit 8                         | 108 | 6.20885E-40 | 1419.22 |
| chitinase-like protein Idgf4 isoform X2                   | 434 | 0           | 1416.7  |
| 40S ribosomal protein S8                                  | 208 | 1.0331E-132 | 1410.75 |
| 40S ribosomal protein S12                                 | 141 | 1.1452E-99  | 1410.1  |
| V-type proton ATPase 16 kDa proteolipid subunit           | 159 | 2.777E-103  | 1345.93 |
| 40S ribosomal protein S23-like                            | 143 | 1.3693E-101 | 1345.87 |
| 60S acidic ribosomal protein P1                           | 109 | 7.34118E-50 | 1341.44 |
| 60S acidic ribosomal protein P1                           | 109 | 7.34118E-50 | 1341.44 |
| NA                                                        | 106 |             | 1336.03 |
| ATP synthase subunit g, mitochondrial                     | 99  | 3.00139E-63 | 1316.38 |
| profilin                                                  | 126 | 8.04157E-90 | 1281.64 |
| profilin                                                  | 126 | 8.04157E-90 | 1281.64 |
| uncharacterized protein LOC100741859 isoform X5           | 296 | 0           | 1273.27 |
| 40S ribosomal protein S3a-like                            | 267 | 3.3733E-172 | 1272.52 |
| 14-3-3 protein zeta                                       | 148 | 2.50849E-97 | 1253.37 |
| NA                                                        | 105 |             | 1230.69 |
| reticulon-1-A isoform X3                                  | 191 | 2.1813E-140 | 1219.88 |
| 40S ribosomal protein S13-like                            | 151 | 1.8321E-108 | 1218.81 |
| hydroxymethylglutaryl-CoA synthase 1                      | 453 | 0           | 1211.72 |
| hydroxymethylglutaryl-CoA synthase 1                      | 453 | 0           | 1211.72 |
| hydroxymethylglutaryl-CoA synthase 1                      | 453 | 0           | 1211.72 |
| NA                                                        | 106 |             | 1191.71 |
| ferritin subunit                                          | 156 | 6.9363E-112 | 1175.64 |
| 2-acylglycerol O-acyltransferase 1                        | 348 | 0           | 1161.43 |
| acidic phospholipase A2 PA4 isoform X2                    | 230 | 7.7919E-165 | 1157.25 |
| farnesol dehydrogenase                                    | 115 | 1.2892E-68  | 1154.19 |
| cytochrome c                                              | 108 | 8.20212E-76 | 1131.15 |
| fatty acyl-CoA reductase 1 isoform X1                     | 511 | 0           | 1127.57 |
| polyadenylate-binding protein 1                           | 630 | 0           | 1121.62 |
| uncharacterized protein LOC100647597                      | 117 | 3.95836E-71 | 1120.78 |
| uncharacterized protein LOC112212744                      | 101 | 2.56176E-32 | 1109.41 |

**Table S15.** TPM values of reference housekeeping gene dimethyladenosine transferase in 14 Aculeate bee and wasp species.

| <b>Species</b>                       | <b>TPM value</b> |
|--------------------------------------|------------------|
| <i>Vespa analis</i>                  | 23.03            |
| <i>Vespa crabro</i>                  | 16.58            |
| <i>Vespa dybowskii</i>               | 35.43            |
| <i>Vespa simillima</i>               | 38.66            |
| <i>Parapolybia varia</i>             | 22.75            |
| <i>Polistes rothneyi</i>             | 27.29            |
| <i>Polistes snelleni</i>             | 32.33            |
| <i>Eumenes decoratus</i>             | 20.39            |
| Sphecidae sp.                        | 7.38             |
| <i>Anterhynchium flavomarginatum</i> | 36.27            |
| <i>Sceliphron deforme</i>            | 32.26            |
| <i>Bombus ardens</i>                 | 14.78            |
| <i>Bombus consobrinus</i>            | 18.23            |
| <i>Bombus ussurensis</i>             | 57.24            |

**Table S16.** Primers used in quantitative real-time PCR.

| Name                                 | Sequence              | Length (bp) | T <sub>m</sub> (°C) | %GC  |
|--------------------------------------|-----------------------|-------------|---------------------|------|
| Arginine kinase-Prot-F               | GTGGCAAACCTTGGCAGTCG  | 20          | 55                  | 60.5 |
| Arginine kinase-Prot-R               | CAGTGCCGAGATTGGTCGAA  | 20          | 55                  | 60.5 |
| Defensin 1-Prot-F                    | TCGTCGTAGTGACAGTCAAC  | 20          | 50                  | 58.4 |
| Defensin 1-Prot-R                    | ACTCGACGTTGTCTATCAGC  | 20          | 50                  | 58.4 |
| Dipeptidyl peptidase 4-Prot-F        | CTTCATTACGGAGAACCCGG  | 20          | 55                  | 60.5 |
| Dipeptidyl peptidase 4-Prot-R        | GATCGTGAAGATCGACGAGC  | 20          | 55                  | 60.5 |
| Hyaluronidase-Prot-F                 | GTGGAGACCGATTTTCCGAC  | 20          | 55                  | 60.5 |
| Hyaluronidase-Prot-R                 | CGTAGCTTCCGCTTCGATCA  | 20          | 55                  | 60.5 |
| Icarapin-Prot-F                      | TGTCCTCGTCCTTCCTGGAT  | 20          | 55                  | 60.5 |
| Icarapin-Prot-R                      | AGGAGCTTGGCCTAAACGAG  | 20          | 55                  | 60.5 |
| Phospholipase A2-Prot-F              | TCGAACACCAGGAGGTGGAT  | 20          | 55                  | 60.5 |
| Phospholipase A2-Prot-R              | ATGATCGTGTTCCCTGCAGC  | 20          | 55                  | 60.5 |
| Serine protease inhibitor-Prot-F     | GGTCGCCTCATCAAACAATG  | 20          | 50                  | 58.4 |
| Serine protease inhibitor-Prot-R     | CGGAAGATTGAGAACCCTTC  | 20          | 50                  | 58.4 |
| Tachykinin-Prot-F                    | GCGGAACGTCGTACAACCTT  | 20          | 50                  | 58.4 |
| Tachykinin-Prot-R                    | CGGAATCCGAAATATCGG    | 20          | 50                  | 58.4 |
| Vitellogenin-Prot-F                  | GCGTTTGTGTTGACACTGG   | 20          | 50                  | 58.4 |
| Vitellogenin-Prot-R                  | ACGTTGAGGTACGTTTCATGC | 20          | 50                  | 58.4 |
| Dimethyladenosine transferase-Prot-F | CCGACGATGCAGTCATCATG  | 20          | 55                  | 60.5 |
| Dimethyladenosine transferase-Prot-R | CTCCTTGGAGATGGTGAGTG  | 20          | 55                  | 60.5 |
| Arginine kinase-Psne-F               | CGATGCTAAGACCTTCCTTG  | 20          | 50                  | 58.4 |
| Arginine kinase-Psne-R               | GATGTCGTTAACGGCGGTTA  | 20          | 50                  | 58.4 |
| Hyaluronidase-Psne-F                 | CGATAACGGCAAATACGAGG  | 20          | 50                  | 58.4 |
| Hyaluronidase-Psne-R                 | AATCGATTACGCCGATGCCA  | 20          | 50                  | 58.4 |
| Icarapin-Psne-F                      | TCGATACCGTTCTCGTCCTT  | 20          | 50                  | 58.4 |
| Icarapin-Psne-R                      | CCTGATCTACACAAGGACCA  | 20          | 50                  | 58.4 |
| Phospholipase A2-Psne-F              | TCGGCAAATGCCAAGCAATC  | 20          | 50                  | 58.4 |
| Phospholipase A2-Psne-R              | AGAACTTGCCACGTTTCCAG  | 20          | 50                  | 58.4 |
| Serine protease inhibitor-Psne-F     | CTCAAGATAGACCCTTCCAC  | 20          | 50                  | 58.4 |
| Serine protease inhibitor-Psne-R     | CACCTTTGTATGGAAGCTCG  | 20          | 50                  | 58.4 |
| Tachykinin-Psne-F                    | CGTGCAATGGCAATGGGATT  | 20          | 50                  | 58.4 |
| Tachykinin-Psne-R                    | GACTTCTTTCCCCTCATACC  | 20          | 50                  | 58.4 |
| Vitellogenin-Psne-F                  | TGGGAATCCGGCAAACAAAGT | 20          | 50                  | 58.4 |
| Vitellogenin-Psne-R                  | CCAGACCAGTGTCAACAACA  | 20          | 50                  | 58.4 |
| Dimethyladenosine transferase-Psne-F | CATGGTCGTATGGTAGGACG  | 20          | 55                  | 60.5 |
| Dimethyladenosine transferase-Psne-R | GTTGTGACCATGCTTGTGCC  | 20          | 55                  | 60.5 |
| Arginine kinase-Edec-F               | TGACCAGGGAAGTGTTTCGAC | 20          | 55                  | 60.5 |
| Arginine kinase-Edec-R               | CAGGGGCGTAGATTCCAACA  | 20          | 55                  | 60.5 |
| Icarapin-Edec-F                      | GTTGATACGGTCGTGGTCCT  | 20          | 55                  | 60.5 |
| Icarapin-Edec-R                      | GTGTAGCTATCGGAGTCGTC  | 20          | 55                  | 60.5 |
| Serine protease inhibitor-Edec-F     | CTGCTTCCGTTCAACCTCT   | 20          | 50                  | 58.4 |
| Serine protease inhibitor-Edec-R     | ATGAGGTCCTTGATACGGTG  | 20          | 50                  | 58.4 |
| Tachykinin-Edec-F                    | TGCACCGATGGGCTTTCAAG  | 20          | 55                  | 60.5 |
| Tachykinin-Edec-R                    | GTACGTTTGCTTACCCCTCG  | 20          | 55                  | 60.5 |
| Neprilysin-Edec-F                    | TGGCAAGCGAGATATCCCGT  | 20          | 55                  | 60.5 |

|                                      |                      |    |    |      |
|--------------------------------------|----------------------|----|----|------|
| Neprilysin-Edec-R                    | CAATGCCGTTGCTCGCTTCA | 20 | 55 | 60.5 |
| Dimethyladenosine transferase-Edec-F | GGCCCATGGTCATATGGTAG | 20 | 55 | 60.5 |
| Dimethyladenosine transferase-Edec-R | CCACGTTTGTGCCATCACTG | 20 | 55 | 60.5 |
| Defensin 1-Bard-F                    | CTTCTCTTTGTGGCTGTAGC | 20 | 50 | 58.4 |
| Defensin 1-Bard-R                    | AAGGTCACAGGTCACCTTC  | 20 | 50 | 58.4 |
| Dipeptidyl peptidase 4-Bard-F        | GCGAACAGCTTCAATGCTAC | 20 | 50 | 58.4 |
| Dipeptidyl peptidase 4-Bard-R        | CAAAGGACCCAAGTGGTTC  | 20 | 50 | 58.4 |
| Hyaluronidase-Bard-F                 | GGCATCCTACAGAATTCGAG | 20 | 50 | 58.4 |
| Hyaluronidase-Bard-R                 | ACCACCGTTTCTCGTCACTA | 20 | 50 | 58.4 |
| Icarapin-Bard-F                      | CACCGTCGTTGTTTTACCGT | 20 | 50 | 58.4 |
| Icarapin-Bard-R                      | CCTGTTCCAATTCCAGGTTG | 20 | 50 | 58.4 |
| Phospholipase A2-Bard-F              | CTTCTCGTGACAAGGGAAAG | 20 | 50 | 58.4 |
| Phospholipase A2-Bard-R              | GTCGTCGTACGATTTTGCCA | 20 | 50 | 58.4 |
| Serine protease inhibitor-Bard-F     | GCTCGCGCTAATTTTTCTGG | 20 | 50 | 58.4 |
| Serine protease inhibitor-Bard-R     | AAGCAAACCAGTTGCAGCAG | 20 | 50 | 58.4 |
| Tachykinin-Bard-F                    | TTGAAACGTGCGATCATGGG | 20 | 50 | 58.4 |
| Tachykinin-Bard-R                    | CTTGCCTCTCATGCCTTGAA | 20 | 50 | 58.4 |
| Vitellogenin-Bard-F                  | GCCAGCAGGATGAATCTAAC | 20 | 50 | 58.4 |
| Vitellogenin-Bard-R                  | GTTCTGCGTTCCTCGAAATC | 20 | 50 | 58.4 |
| Dimethyladenosine transferase-Bard-F | GCCGACGTTAGAAATGTTGG | 20 | 50 | 58.4 |
| Dimethyladenosine transferase-Bard-R | CAGTTCGTGGGAGAACAGTA | 20 | 50 | 58.4 |

Table S16
